# Supplementary material for: Ester vs. amide on folding: a case study with a 2-residue synthetic peptide
Source: Royal Society of Chemistry journal article supplement (doi:10.1039/c3ob41967c), 2013-01-01
Supplement: c3ob41967c.pdf [file c3ob41967c.pdf]

## Electronic Supplementary Information

### Ester vs. amide on folding: A case study with a 2-residue synthetic peptide

*Kuruppanthara N. Vijayadas,<sup>†</sup> Roshna V. Nair,<sup>†</sup> Rupesh L. Gawade,<sup>‡</sup>  
Amol S. Kotmale,<sup>§</sup> Panchami Prabhakaran,<sup>†,‡</sup> Rajesh G. Gonnade,<sup>‡</sup>  
Vedavati G. Puranik,<sup>‡</sup> Pattuparambil. R. Rajamohanan,<sup>§</sup> and Gangadhar J. Sanjayan<sup>\*,†</sup>*

*<sup>†</sup>Division of Organic Chemistry, <sup>§</sup>Central NMR Facility, <sup>‡</sup>Center for Materials  
Characterization, National Chemical Laboratory, Dr. Homi Bhabha Road, Pune 411  
008, India.*

*<sup>‡</sup>Department of Chemistry & Biology, University of Leeds, LS2 9JT, UK.*

|                                                                        |          |
|------------------------------------------------------------------------|----------|
| Contents                                                               | S1       |
| General methods                                                        | S2       |
| Synthetic Scheme                                                       | S3       |
| Experimental procedures                                                | S4-S12   |
| Mass spectra of compounds                                              | S13-S19  |
| <sup>1</sup> H NMR spectra of compounds                                | S20-S26  |
| <sup>13</sup> C and DEPT-135 spectra of compounds                      | S27-S39  |
| 2D COSY and TOCSY spectra of compounds <b>1</b> and <b>5</b> (amides)  | S40-S43  |
| 2D COSY and TOCSY spectra of compounds <b>6</b> and <b>10</b> (esters) | S44-S48  |
| 2D NOESY spectra of compounds <b>1</b> and <b>5</b> (amides)           | S49-S50  |
| 2D NOESY spectra of compound <b>6</b> and <b>10</b> (esters)           | S51-S52  |
| NMR titration studies of compounds <b>1</b> , <b>5</b> , <b>10</b>     | S53-S55  |
| Crystal Data Table-Hydrogen bonding parameters and Crystal Data        | S56- S61 |
| References                                                             | S61      |

### General Methods.

Unless otherwise stated, all the chemicals and reagents were obtained commercially. Dry solvents were prepared by the standard procedures. Analytical Thin Layer Chromatography was done on pre-coated silica gel plates (Kieselgel 60F<sub>254</sub>, Merck). Column Chromatographic purifications were done with 100-200 or 230-400 Mesh Silica gel. NMR spectra were recorded in CDCl<sub>3</sub> or DMSO-*d*<sub>6</sub> on AV 200 MHz, AV 400 MHz or AV 500 MHz spectrometers. All chemical shifts are reported in  $\delta$  ppm downfield to TMS and peak multiplicities as singlet (s), doublet (d), quartet (q), broad singlet (bs), and multiplet (m). The DMSO-*d*<sub>6</sub> titration studies were done in CDCl<sub>3</sub>. Elemental analyses were performed on an Elementar-Vario-EL (Heraeus Company Ltd., Germany). IR spectra were recorded in CHCl<sub>3</sub> using Shimadzu FTIR-8400 spectrophotometer. Melting points were determined on a Buchi Melting Point B-540. Electron Scattered Ionization (ESI) Mass Spectrometric measurements were done with API QSTAR Pulsar mass Spectrometer. Single crystal X-ray data were collected on a *Bruker SMART APEX* CCD Area diffractometer with graphite monochromatized (Mo Ka = 0.71073Å) radiation at room temperature or less.

## Synthetic Scheme

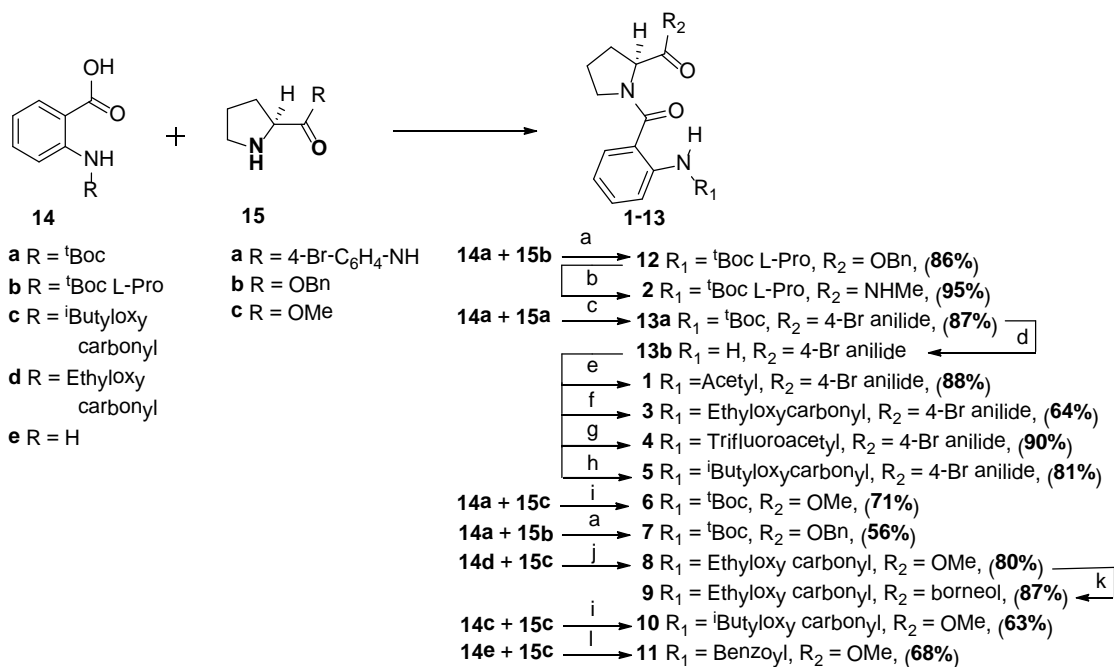

## Reagents and Conditions

(a) DCC, HOBT, DCM, rt, 12h; (b) methanolic MeNH<sub>2</sub>, rt, 3h; (c) EDC.HCl, HOBT, DCM, rt, 12h; (d) TFA, DCM, rt, 3h; (e) AcCl, Et<sub>3</sub>N, DCM, rt, 12h; (f) Ethyl chloroformate, Et<sub>3</sub>N, DCM, rt, 12h; (g) Trifluoroacetic anhydride, Et<sub>3</sub>N, DCM, rt, 12h; (h) Isobutyl chloroformate, Et<sub>3</sub>N, DCM, rt, 12h; (i) EDC.HCl, DMAP, DCM, rt, 12h; (j) HBTU, DIPEA, MeCN, rt, 12h; (k) (i) LiOH.H<sub>2</sub>O, MeOH, H<sub>2</sub>O, rt, 12h, (ii) DCC, DMAP, Borneol, rt, 12h; (l) (i) Na<sub>2</sub>CO<sub>3</sub>, BzCl, THF, rt, 12h, (ii) DBU, DMF, 4A mol. sieves, rt, 3h.

## Experimental Procedures

### 2-((Tert-butoxycarbonylamino)benzoic acid, **14a**:<sup>1</sup>

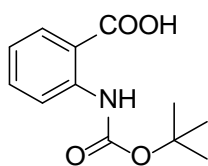

To a solution of anthranilic acid (1g, 6.6mmoles) in dioxane (15mL) and water (7.5mL), NaOH (0.528, 13.2 mmoles) was added followed by the addition of <sup>t</sup>Boc-anhydride (1.7g, 7.9mmoles). The reaction mixture was stirred at room temperature for 3 hours. The solvents were evaporated under reduced pressure. The residue was acidified with saturated potassium bisulphate solution, followed by extraction with DCM (10mL X 3). Evaporation under reduced pressure afforded the crude product **14a**, which was used for further reactions, without purification.

### 2-((Isobutoxycarbonyl)amino)benzoic acid, **14c**:<sup>2</sup>

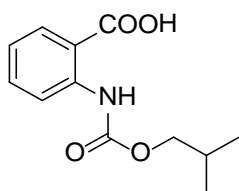

To a solution of anthranilic acid (1g, 6.6mmoles) in dioxane (15mL) and water (7.5mL), NaOH (0.528, 13.2 mmoles) was added followed by the addition of isobutyl chloroformate (1.7g, 7.9mmoles). The reaction mixture was stirred at room temperature for 3 hours, after which the solvents were evaporated under reduced pressure. The residue was acidified with saturated potassium bisulphate solution, followed by extraction with DCM (10mL X 3). Evaporation under reduced pressure afforded the crude product **14c**, which was used for further reactions, without purification.

### Methyl 2-((ethoxycarbonyl)amino)benzoate, **16**:

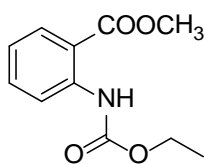

To a solution of anthranilic methyl ester (0.5g, 3.3mmoles) in dry DCM (10mL) containing DIPEA (1.25g, 1.7mL, 9.92 mmoles) was added ethyl chloroformate (0.43g, 3.92 mmoles), drop wise with vigorous stirring. The reaction mixture was stirred at room temperature for 12 h. The reaction mixture was diluted with DCM and the organic layer was washed sequentially with saturated sodium bicarbonate, potassium bisulphate and water. The organic layer was dried over anhydrous Na<sub>2</sub>SO<sub>4</sub> solution and evaporated under reduced pressure to furnish the crude product which was purified by column chromatography, (85:15 pet. ether/ethyl acetate, R<sub>f</sub>: 0.5) affording **16** as a white solid (0.63g, 93%), mp: 60-61°C; IR (CHCl<sub>3</sub>, ν (cm<sup>-1</sup>): 3310, 3021, 2401, 1731, 1694,

1591, 1529, 1453, 1315, 1245, 1216;  $^1\text{H}$  NMR ( $\text{CDCl}_3/200\text{MHz}$ ):  $\delta$  ppm 10.47 (s, 1H), 8.42-8.46 (d,  $J=8.23\text{Hz}$ , 1H), 7.97-8.01 (dd,  $J=7.98\text{Hz}$ ,  $J=1.63\text{Hz}$  1H), 7.47-7.56 (m, 1H), 6.96-7.05 (m, 1H), 4.17-4.27 (q, 2H), 3.90 (s, 3H), 1.28-1.35 (t, 1H,  $J=7.07$ ),  $^{13}\text{C}$  NMR ( $\text{CDCl}_3, 125\text{MHz}$ ):  $\delta$  ppm 168.4, 153.6, 141.8, 134.5, 130.8, 121.3, 118.7, 114.3, 61.1, 52.1, 14.4; LC-MS: 247.06 ( $\text{M}+23$ ) $^+$ ; Elemental Analysis calculated for  $\text{C}_{11}\text{H}_{13}\text{NO}_4$ : C, 59.19; H, 5.87; N, 6.27; Found: 58.65; H, 5.16; N, 5.94.

### Representative procedure for ester hydrolysis:

#### 2-((Ethoxycarbonyl)amino)benzoic acid, **14d**

To a solution of **16** (0.5g) in methanol (5mL), LiOH (0.18, 0.008mmol) in water (5mL) was added. After stirring for 12h, the reaction mixture was stripped of the solvent under reduced pressure, acidified using saturated  $\text{KHSO}_4$  solution and then extracted with ethyl acetate (3x5mL). The organic layer was evaporated under reduced pressure to obtain the free acid **14d** which was used for next reaction, without further purification.

**Representative procedure for peptide coupling** (for specific coupling agents, see scheme-1):

#### (S)-tert-butyl 2-(2-(4-bromophenylcarbonyl)pyrrolidine-1-carbonyl)phenylcarbamate, **13a**:

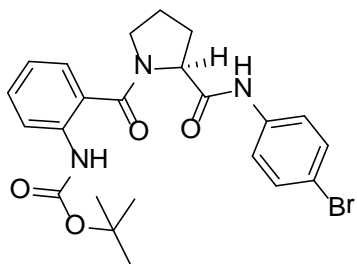

To a solution of **15a** (0.25g, 0.9949mmole) in dry DCM (5mL), Boc-Ant-OH (0.5g, 1.8903mmoles), EDC.HCl (0.286g, 1.4924) and HOBT (0.062g, 25wt %) were added. After stirring at room temperature for 12 hours, the reaction mixture was diluted with DCM and washed sequentially with saturated sodium bicarbonate, potassium bisulphate solution and water. The washings were extracted with DCM (10mLx2) and dried with anhydrous  $\text{Na}_2\text{SO}_4$  and evaporated under reduced pressure. The crude residue thus obtained was purified by column chromatography, (50:50 pet ether/ethyl acetate,  $R_f$ : 0.5) furnishing **13a** as a white solid (0.4181g, 87%), mp: 97-101°C;  $[\alpha]_D^{28}$ : -28.89° ( $c = 1.066$ ,  $\text{CHCl}_3$ ); IR ( $\text{CHCl}_3$ ,  $\nu$  ( $\text{cm}^{-1}$ ): 3279, 3018, 2359, 1730, 1681, 1614, 1537, 1429, 1367, 1300, 1247, 1159, 1074;  $^1\text{H}$  NMR ( $\text{CDCl}_3/500\text{MHz}$ ):  $\delta$  ppm 9.59 (s, 1H), 8.46(s, 1H), 8.26-8.28 (d,  $J=8.26\text{Hz}$ , 1H), 7.43 (t,  $J=7.43\text{Hz}$ , 1H), 7.36-7.37 (d,  $J=7.43\text{Hz}$ , 1H), 7.25-7.26 (d,  $J=8.8\text{Hz}$ , 2H), 7.15-7.16 (d, 2H,  $J=8.8\text{Hz}$ ), 7.07 (t,

1H,  $J=7.43\text{Hz}$ ), 5.01-5.04 (m, 1H), 3.60-3.65 (m, 1H), 3.49-3.53(m, 1H), 2.23-2.37 (m, 2H) 2.03-2.11 (m, 1H) 1.85-1.93 (m, 1H) 1.55(s, 9H);  $^{13}\text{C}$  NMR ( $\text{CDCl}_3$ ,125MHz):  $\delta$  ppm 169.7, 153.1, 137.2, 136.7, 131.3, 131.1, 126.8, 123.9, 122.0, 120.8, 120.1, 116.1, 80.6, 60.7, 50.5, 28.9, 25.1; ESI-MS: 490.3465 ( $\text{M}+2\text{H}$ ) $^+$ ; 510.3085 ( $\text{M}+\text{Na}$ ) $^+$ ; 428.2927 ( $\text{M}+\text{K}$ ) $^+$ ; Elemental Analysis calculated for  $\text{C}_{23}\text{H}_{26}\text{BrN}_3\text{O}_4$ : C, 56.56; H, 5.37; N, 8.60; Found: C, 56.18; H, 5.87; N, 8.10.

### Representative procedure for $^t$ Boc deprotection using TFA/DCM.

#### (S)-1-(2-aminobenzoyl)-N-(4-bromophenyl)pyrrolidine-2-carboxamide, **13b**:

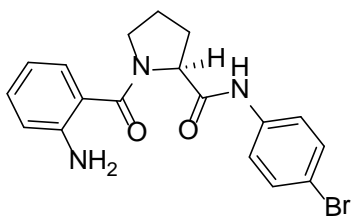

To a solution of **13a** (0.1, 0.2577mmol) in DCM (1mL) maintained at  $0^\circ\text{C}$ , trifluoroacetic acid (1 mL) was added drop wise. The reaction mixture was stirred at  $0^\circ\text{C}$  for 10 minutes and then at RT for 3 h. The residue obtained after evaporating the volatiles was neutralized using saturated solution of sodium bicarbonate and extracted repeatedly using DCM (3x5mL). The organic layer was dried over anhydrous  $\text{Na}_2\text{SO}_4$  and evaporated under reduced pressure to obtain the amine **13b** which was used for next reaction, without further purification.

#### (S)-1-(2-acetamidobenzoyl)-N-(4-bromophenyl)pyrrolidine-2-carboxamide, **1**:

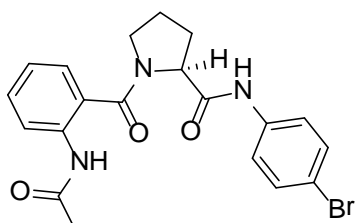

To a solution of **13b** (0.1 gm, 0.2583mmol) in DCM (5 mL),  $\text{Et}_3\text{N}$  (0.11mL, 0.77507mmol) and acetyl chloride (0.03mL, 0.3875mmol) were added. After stirring for 12 hours, the reaction mixture was diluted with DCM (5 mL) and the organic layer was washed with saturated sodium bicarbonate (5mL), potassium bisulphate (5mL) and water (5mL). The organic layer was dried over anhydrous  $\text{Na}_2\text{SO}_4$  solution and evaporated under reduced pressure to get the crude product which was purified by column chromatography, (20:80 pet. ether/ethyl acetate,  $R_f$ : 0.5) affording **1** as a white solid (0.98g, 88%), crystallized from a solution of methanol and dichloromethane, mp:  $226-229^\circ\text{C}$ ;  $[\alpha]_D^{24}$ :  $-90^\circ$  ( $c = 0.4$ ,  $\text{CHCl}_3$ ); IR ( $\text{CHCl}_3$ )  $\nu$  ( $\text{cm}^{-1}$ ) 3261, 3020, 2401, 2360, 2343, 1716, 1697, 1683, 1653, 1647, 1635, 1620;  $^1\text{H}$  NMR( $\text{CDCl}_3$ /200MHz):  $\delta$  ppm 9.47 (s, 1H), 9.29 (s, 1H), 8.35-8.39 (d,

1H,  $J=8.06\text{Hz}$ ), 7.38-7.47 (dd, 1H,  $J=15.62\text{ Hz}$ ,  $J=1.59\text{ Hz}$ ), 7.11-7.32 (m, 6H), 4.95-5.01 (m, 1H), 3.39-3.63 (m, 2H), 2.24 (s, 3H), 1.87-2.46 (m, 4H),  $^{13}\text{C}$  NMR (DMSO- $d_6$ , 100MHz):  $\delta$  ppm 171.3, 168.9, 167.5, 138.4, 135.0, 131.9, 129.9, 128.5, 126.8, 123.9, 121.9, 121.5, 115.4, 60.4, 49.3, 30.2, 24.9, 24.1; LC-MS: 454.05 (M+Na) $^+$ ; Elemental Analysis calculated for  $\text{C}_{20}\text{H}_{20}\text{BrN}_3\text{O}_3$ : C, 55.83; H, 4.68; N, 9.77; Found: C, 57.36; H, 5.14; N, 8.96.

**(S)-1-(2-Trifluoroacetamidobenzoyl)-N-(4-bromophenyl)pyrrolidine-2-carboxamide,**

**4:**

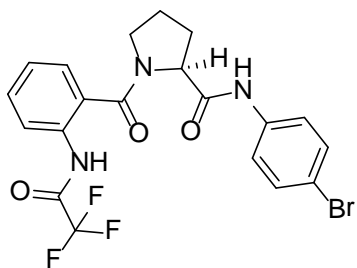

Compound **4**, obtained by following the procedure used for preparation of **1** (*vide supra*), except using trifluoroacetic anhydride as the acylating agent, was purified by column chromatography (20:80 pet. ether/ethyl acetate,  $R_f$ : 0.5), white solid (0.112g, 90%), crystallized from methanol, mp: 210-217°C;  $[\alpha]_D^{27}$ : -199° ( $c = 0.1$ ,

$\text{CHCl}_3$ ); IR ( $\text{CHCl}_3$ )  $\nu$  ( $\text{cm}^{-1}$ ) 3310, 3020, 2400, 1733, 1698, 1621, 1531, 1422, 1215;  $^1\text{H}$  NMR ( $\text{CDCl}_3$ /200MHz):  $\delta$  ppm 10.63 (s, 1H), 9.04 (s, 1H), 8.33-8.38 (d, 1H,  $J=8.03\text{Hz}$ ), 7.52-7.60 (m, 2H), 7.26-7.42 (m, 6H), 4.90-4.97 (m, 1H), 3.61-3.80 (m, 2H), 1.87-2.55 (m, 4H),  $^{13}\text{C}$  NMR (50 MHz,  $\text{CDCl}_3$ )  $\delta$ : ppm 169.6, 168.7, 136.8, 134.5, 131.9, 131.7, 128.1, 125.0, 124.4, 122.3, 121.2, 116.8, 61.0, 51.2, 27.8, 25.4; ESI-MS: 508.6183 (M+Na) $^+$ ; 524.6121 (M+K) $^+$ . Elemental Analysis calculated for  $\text{C}_{20}\text{H}_{17}\text{BrF}_3\text{N}_3\text{O}_3$ : C, 49.60; H, 3.54; N, 8.68; Found: C, 47.37; H, 6.46; N, 8.16.

**(S)-ethyl 2-(2-(4-bromophenylcarbamoyl)pyrrolidine-1-carbonyl)phenylcarbamate,**

**3:**

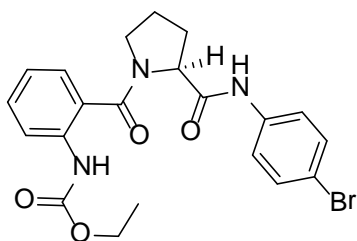

Compound **3**, obtained by following the procedure used for preparation of **1** (*vide supra*), except using ethyl chloroformate as the acylating agent, was purified by column chromatography (30:70 pet. ether/ethyl acetate,  $R_f$ : 0.5), white solid (0.076g, 64%), crystallized from a solution of methanol and dichloromethane, mp: 201-

203°C;  $[\alpha]_D^{26}$ : -141° ( $c = 0.1$ ,  $\text{CHCl}_3$ ); IR ( $\text{CHCl}_3$ )  $\nu$  ( $\text{cm}^{-1}$ ): 3421, 3020, 2400, 1733, 1687, 1616, 1541, 1427, 1398, 1302, 1215;  $^1\text{H}$  NMR ( $\text{CDCl}_3$ /400MHz):  $\delta$  ppm 9.58 (s,

1H), 8.66(s, 1H), 8.25-8.27 (d,  $J=8.18\text{Hz}$ , 1H), 7.43-1.47 (t,  $J=7.77\text{Hz}$ , 1H), 7.38-7.39 (d,  $J=7.40\text{Hz}$ , 1H), 7.25-7.27 (d,  $J=8.7\text{Hz}$ , 2H), 7.15-7.18 (d, 2H,  $J=8.51\text{Hz}$ ), 7.08-7.12 (t, 1H,  $J=7.40\text{Hz}$ ), 5.00-5.03 (m, 1H), 4.22-4.27 (m, 2H), 3.60-3.70 (m, 1H), 3.50-3.56 (m, 1H), 2.23-2.39 (m, 2H), 2.04-2.14 (m, 1H) 1.84-1.94 (m, 1H), 1.32-1.35 (t, 3H,  $J=7.15$ );  $^{13}\text{C}$  NMR ( $\text{CDCl}_3$ , 125MHz):  $\delta$  ppm 169.8, 153.9, 137.2, 136.5, 131.3, 131.2, 126.8, 123.9, 122.3, 120.8, 120.3, 116.2, 61.3, 60.9, 50.7, 28.9, 25.1, 14.4; LC-MS: 482.08 ( $\text{M}+\text{Na}^+$ ); Elemental Analysis calculated for  $\text{C}_{21}\text{H}_{22}\text{BrN}_3\text{O}_4$ : C, 54.79; H, 4.82; 9.13; Found: C, 58.16; H, 4.38; N, 8.92.

### (S)-Isobutyl 2-(2-(4-bromophenylcarbamoyl)pyrrolidine-1-carbonyl)phenyl

#### Carbamate, 5:

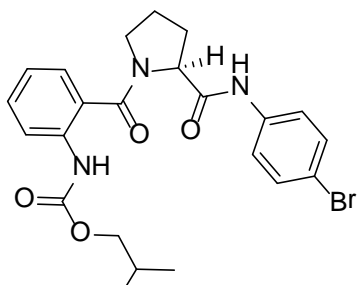

Compound **5**, obtained by following the procedure used for preparation of **1** (*vide supra*), except using isobutyl chloroformate as the acylating agent, was purified by column chromatography (30:70 pet. ether/ethyl acetate,  $R_f$ : 0.55), white solid (0.102g, 81%), mp: 200-203°C;  $[\alpha]_D^{27}$ :  $-142^\circ$  ( $c = 0.1$ ,  $\text{CHCl}_3$ ); IR ( $\text{CHCl}_3$ ,  $\nu$  ( $\text{cm}^{-1}$ ):

3316, 3020, 2400, 1734, 1686, 1617, 1541, 1457, 1398, 1302, 1215;  $^1\text{H}$  NMR ( $\text{CDCl}_3$ /200MHz):  $\delta$  ppm 9.45 (s, 1H), 8.61 (s, 1H), 8.19-8.23 (d,  $J=8.27\text{Hz}$ , 1H), 6.99-7.41 (m, 7H), 4.91-4.97 (m, 1H), 3.89-3.92 (d, 1H,  $J=6.54$ ), 3.36-3.61 (m, 2H), 1.75-2.25 (m, 5H), 0.91-0.94 (d, 6H,  $J=6.54$ );  $^{13}\text{C}$  NMR ( $\text{CDCl}_3$ , 125MHz):  $\delta$  ppm 169.7, 153.1, 137.2, 136.7, 131.3, 131.1, 126.8, 123.9, 122.0, 120.8, 120.1, 116.1, 80.6, 60.7, 50.5, 28.9, 25.1; ESI-MS: 488.4006 ( $\text{M}+\text{H}^+$ ); 510.2612; ( $\text{M}+\text{Na}^+$ ); Elemental Analysis calculated for  $\text{C}_{23}\text{H}_{26}\text{BrN}_3\text{O}_4$ : C, 56.56; H, 5.37; Br, 16.36; N, 8.60; Found: C, 56.19; H, 5.85; N, 8.98.

### (S)-Tert-butyl 2-(2-((S)-2-(benzyloxycarbonyl)pyrrolidine-1-carbonyl)phenyl carbamoyl)pyrrolidine-1-carboxylate, 12

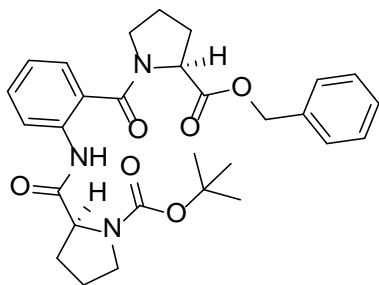

Compound **12**, obtained by following the coupling procedure used for the preparation of **13a** (*vide supra*), was purified by column chromatography (50% ethyl acetate/pet. ether,  $R_f$ : 0.4), waxy liquid (1.34 g, 86%);  $[\alpha]_D^{26}$ :  $-74.6^\circ$  ( $c$  0.34,  $\text{CHCl}_3$ ); IR ( $\nu$ ) neat ( $\text{cm}^{-1}$



<sup>1</sup>) 3307, 3066, 2978, 1743, 1692, 1627, 1596, 1525, 1404, 1215, 1165, 1121, 1088, 1031;  
<sup>1</sup>H NMR (400 MHz, CDCl<sub>3</sub>) δ: 9.76<sub>rotamer</sub> (0.55H), 9.67<sub>rotamer</sub> (0.45H), 8.50-8.35 (m, 1H),  
7.5-7.0 (m, 8H), 5.28-5.19 (m, 1H), 4.78-4.75 (m, 1H), 4.43<sub>rotamer</sub> (0.55H), 4.26<sub>rotamer</sub>  
(0.45H), 3.80-3.42 (m, 4H), 2.38-1.8 (m, 8H), 1.48<sub>rotamer</sub> (4.3H), 1.40<sub>rotamer</sub> (4.7H); <sup>13</sup>C  
NMR (100 MHz, CDCl<sub>3</sub>) δ: 171.6, 171.3, 168.1, 154.7, 153.7, 136.6, 135.97, 135.3,  
130.9, 130.5, 128.2, 127.98, 127.7, 127.1, 126.9, 124.4, 123.3, 122.9, 122.5, 122.8, 122.5,  
121.3, 120.6, 79.5, 66.7, 66.6, 61.9, 61.1, 58.7, 49.8, 49.6, 46.8, 46.4, 31.0, 29.9, 28.8,  
28.1, 27.9, 24.8, 24.0, 23.5; ESI MS: 522.5042 (M+H)<sup>+</sup>, 544.5149 (M+Na)<sup>+</sup>, 560.5602  
(M+K)<sup>+</sup>; Elemental analyses calculated for C<sub>29</sub>H<sub>35</sub>N<sub>3</sub>O<sub>6</sub>: C, 66.78; H, 6.76; N, 8.06;  
Found: C, 67.01; H, 6.93; N, 7.69.

**(S)-tert-butyl 2-(2-((S)-2-(methylcarbamoyl)pyrrolidine-1-carbonyl) phenyl  
carbamoyl)pyrrolidine-1-carboxylate, 2:**

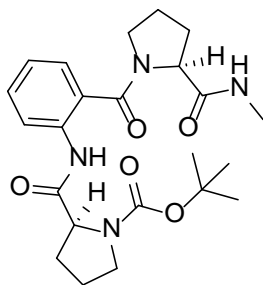

The ester **12** (0.45 g, 0.86 mmol) was converted into its corresponding methyl amide **2** by stirring the compound in methanolic methyl amine at room temperature. After completion of the reaction (3 h), the solvent was stripped off and the product was taken in dichloromethane, washed with water and the organic layer was dried over anhydrous sodium sulfate. Evaporation under reduced pressure and purification by column chromatography afforded **12** (5% methanol /ethyl acetate, R<sub>f</sub>: 0.5), 0.36 g, 95%, ; mp: 185-187 °C; [α]<sub>D</sub><sup>26</sup>: -120° (c 0.2, CHCl<sub>3</sub>); IR (ν) nujol (cm<sup>-1</sup>): 3273, 2726, 1698, 1655, 1618, 1586, 1460, 1377, 1307, 1215, 1156; <sup>1</sup>H NMR (400 MHz, CDCl<sub>3</sub>) δ: 10.01<sub>rotamer</sub> (0.5H), 9.71-9.56<sub>rotamer</sub> (0.5H), 8.44-8.13 (m, 1H), 7.41 (b, 2H), 7.13-7.09 (t, J = 7.41 Hz, 1H), 6.70 (bs, 1H), 4.7-4.63 (b, 1H), 4.42<sub>rotamer</sub> (0.4H), 4.29<sub>rotamer</sub> (0.6H), 3.8-3.4 (m, 4H), 4.85-4.84 (d, J = 4.72 Hz, 3H), 2.4-1.8 (m, 8H), 1.48<sub>rotamer</sub> (s, 4H), 1.38<sub>rotamer</sub> (s, 5H); <sup>13</sup>C NMR (100 MHz, CDCl<sub>3</sub>) δ: 172.2, 171.9, 171.8, 169.2, 168.9, 155, 154.2, 136.6, 136.0, 135.3, 131.1, 130.5, 130.3, 126.8, 123.9, 123.5, 123.3, 122.9, 122.5, 120.9, 80.1, 79.9, 62.0, 60.96, 60.1, 50.3, 49.7, 47.1, 46.7, 31.8, 31.3, 29.9, 28.9, 28.2, 26.2, 25.1, 24.3, 23.7, 22.8; ESI MS: 445.3834 (M+H)<sup>+</sup>, 467.3785 (M+Na)<sup>+</sup>, 483.36 (M+K)<sup>+</sup>; Elemental analyses calculated for C<sub>23</sub>H<sub>32</sub>N<sub>4</sub>O<sub>5</sub>: C, 62.14; H, 7.26; N, 12.60; Found: C, 61.86; H, 7.14; N, 12.98.

**(S)-Benzyl 1-(2-(*tert*-butoxycarbonylamino)benzoyl)pyrrolidine-2-carboxylate, 7:**

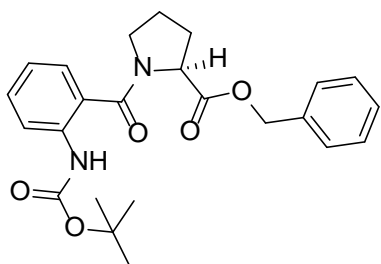

Preparation of this compound is reported.<sup>1</sup> **7** was crystallized from a mixture of ethylacetate and pet. ether.

**(S)-Methyl 1-(2-(*tert*-butoxycarbonylamino)benzoyl)pyrrolidine-2-carboxylate, 6:**

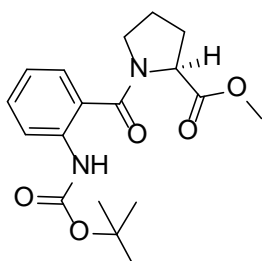

Compound **6**, obtained by following the coupling procedure used for the preparation of **13a** (*vide supra*), was purified by column chromatography (30:70 pet. ether/ethyl acetate,  $R_f$ : 0.5), 3.7 g, 71%, white solid, crystallized from a solution of methanol and dichloromethane; mp: 94-96 °C;  $[\alpha]_D^{27}$ : -91° ( $c = 0.1$ ,  $\text{CHCl}_3$ ); IR ( $\text{CHCl}_3$ )  $\nu$  ( $\text{cm}^{-1}$ ) 3368, 3020, 2982, 1724, 1625, 1596, 1522, 1454, 1414, 1216, 1159, 1052, 1026;  $^1\text{H}$  NMR (200 MHz,  $\text{CDCl}_3$ )  $\delta$ : 8.33 (s, 1H), 8.13-8.18 (d,  $J = 8.36$  Hz, 1H), 7.32-7.39 (m, 2H), 6.95-7.03 (t,  $J = 7.22$  Hz, 1H), 4.63-4.70 (m, 1H), 3.77 (s, 3H) 3.40-3.65 (m, 2H), 2.25-2.42 (m, 1H), 1.79-2.10 (m, 3H), 1.48 (s, 9H);  $^{13}\text{C}$  NMR (50 MHz,  $\text{CDCl}_3$ )  $\delta$  172.4, 168.7, 152.9, 137.2, 130.9, 128.6, 127.1, 123.3, 121.5, 120.0, 80.2, 59.0, 52.3, 49.9, 29.2, 28.2, 25.2; LC-MS: 371.02 ( $\text{M}+\text{Na}$ )<sup>+</sup>; Elemental analyses calculated for  $\text{C}_{18}\text{H}_{24}\text{N}_2\text{O}_5$ : C, 62.05; H, 6.94; N, 8.04; Found: C, 61.99; H, 7.07; N, 8.58.

**(S)-Methyl 1-(2-(*iso*-butoxycarbonylamino)benzoyl)pyrrolidine-2-carboxylate, 10:**

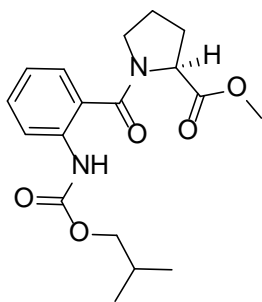

Compound **10**, obtained by following the coupling procedure used for the preparation of **13a** (*vide supra*), was purified by column chromatography (35:65 pet. ether/ethyl acetate,  $R_f$ : 0.5), 0.32g, 63%, white solid, crystallized from a solution of diethyl ether and pet-ether; mp: 76-80 °C;  $[\alpha]_D^{27}$ : -92° ( $c = 0.1$ ,  $\text{CHCl}_3$ ); IR ( $\text{CHCl}_3$ )  $\nu$  ( $\text{cm}^{-1}$ ) 3366, 3020, 2959, 1733, 1625, 1597, 1524, 1456, 1415, 1216, 1113, 1058;  $^1\text{H}$  NMR (400 MHz,  $\text{CDCl}_3$ )  $\delta$ : 8.54 (s, 1H), 8.17-8.21 (d,  $J = 8.28$  Hz, 1H), 7.31-7.43 (m, 2H), 7.00-

7.08 (m, 1H), 4.66-4.73 (m, 1H), 3.91-3.95 (m, 2H), 3.79 (s, 3H), 3.42-3.65 (m, 2H), 2.27-2.44 (m, 1H), 1.78-2.16 (m, 4H), 0.95-0.98 (d,  $J=6.61$ , 6H);  $^{13}\text{C}$  NMR (50 MHz,  $\text{CDCl}_3$ )  $\delta$ : 172.6, 168.7, 153.9, 136.9, 131.1, 127.1, 123.7, 121.9, 120.1, 71.2, 59.0, 52.4, 49.9, 29.3, 27.9, 25.2, 18.9; LC-MS: 371.11 ( $\text{M}+\text{Na}^+$ ); Elemental analyses calculated for  $\text{C}_{18}\text{H}_{24}\text{N}_2\text{O}_5$ : C, 62.05; H, 6.94; N, 8.04; Found: C, 62.37; H, 6.67; N, 8.35.

**(S)-Methyl 1-(2-(Ethoxyxycarbonylamino)benzoyl)pyrrolidine-2-carboxylate, 8:**

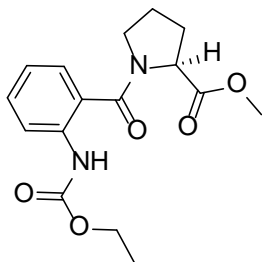

Compound **8**, obtained by following the coupling procedure used for the preparation of **13a** (*vide supra*), was purified by column chromatography (50:50 pet. ether/ethyl acetate,  $R_f$ : 0.5), 0.32g, 80%, white solid, crystallized from a solution of ethyl acetate and pet-ether; mp: 76-80 °C;  $[\alpha]_D^{26}$ :  $-103^\circ$  ( $c = 0.1$ ,  $\text{CHCl}_3$ ); IR ( $\text{CHCl}_3$ )  $\nu$  ( $\text{cm}^{-1}$ ) 3378, 3020, 2400, 1732,

1626, 1597, 1525, 1416, 1215;  $^1\text{H}$  NMR (200 MHz,  $\text{CDCl}_3$ )  $\delta$ : 8.49 (s, 1H), 8.14-8.19 (d,  $J = 8.58$  Hz, 1H), 7.33-7.41 (m, 2H), 6.98-7.05 (t,  $J = 7.20$  Hz, 1H), 4.63-4.70 (m, 1H), 4.12-4.23 (m, 2H), 3.77 (s, 3H), 3.40-3.64 (m, 2H), 2.25-2.46 (m, 1H), 1.79-2.10 (m, 3H), 1.23-1.30 (t,  $J=7.18$ , 3H);  $^{13}\text{C}$  NMR (50 MHz,  $\text{CDCl}_3$ )  $\delta$ : 172.4, 168.6, 153.7, 136.8, 131.0, 127.1, 123.4, 121.9, 120.0, 61.01, 59.0, 52.3, 49.9, 29.3, 25.2, 14.3; LC-MS: 343.06 ( $\text{M}+\text{Na}^+$ ); Elemental analyses calculated for  $\text{C}_{16}\text{H}_{20}\text{N}_2\text{O}_5$ : C, 59.99; H, 6.24; N, 8.74; Found: C, 59.37; H, 5.67; N, 9.12.

**(2S)-((2R)-1,7,7-trimethylbicyclo[2.2.1]heptan-2-yl) 1-(2-(ethoxycarbonylamino)benzoyl)pyrrolidine-2-carboxylate, 9:**

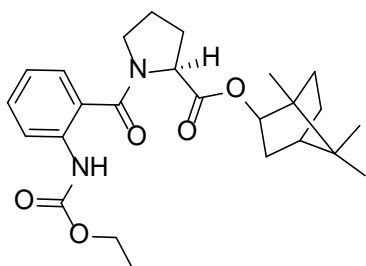

Compound **8** (0.2 g, 0.625 mmol) was first subjected to ester hydrolysis following the general procedure (*vide supra*). The free acid thus obtained was subjected to peptide coupling as mentioned in the representative procedure for **13a** (70:30 pet. ether/ethyl acetate,  $R_f$ : 0.5) to afford **9** (0.242g, 87%) as a white solid, crystallized from a solution of ethyl acetate and pet-ether; mp: 127-128 °C;  $[\alpha]_D^{27}$ :  $-93^\circ$  ( $c = 0.1$ ,  $\text{CHCl}_3$ ); IR ( $\text{CHCl}_3$ )  $\nu$  ( $\text{cm}^{-1}$ ) 3448, 3020, 1726, 1626, 1597, 1524, 1455, 1418, 1216;  $^1\text{H}$  NMR (200 MHz,  $\text{CDCl}_3$ )  $\delta$ : 8.70 (s, 1H), 8.13-8.29 (m, 1H), 7.36-7.43 (m, 2H), 6.93-7.06 (m, 1H), 4.99-5.06 (m, 1H), 4.67-4.83 (m, 1H), 4.13-4.23 (m, 2H), 3.48-3.86

(m, 2H), 2.28-2.47 (m, 2H), 1.85-2.11 (m, 4H), 1.63-1.82 (m, 3H), 1.12-1.40 (m, 5H), 0.84-0.91 (m, 9H);  $^{13}\text{C}$  NMR (50 MHz,  $\text{CDCl}_3$ )  $\delta$ : 172.2, 168.5, 153.8, 137.3, 131.1, 127.2, 123.2, 121.7, 120.0, 80.7, 61.0, 59.5, 50.0, 49.0, 47.9, 44.8, 36.4, 29.3, 27.9, 27.1, 25.3, 19.6, 18.7, 14.4, 13.5; LC-MS: 465.23 ( $\text{M}+\text{Na}$ ) $^+$ , 481.21 ( $\text{M}+\text{K}$ ) $^+$ ; Elemental analyses calculated for  $\text{C}_{25}\text{H}_{34}\text{N}_2\text{O}_5$ : 67.85; H, 7.74; N, 6.33; Found: 67.69; H, 7.52; N, 6.52.

**(S)-Methyl 1-(2-benzamidobenzoyl)pyrrolidine-2-carboxylate, 11:**

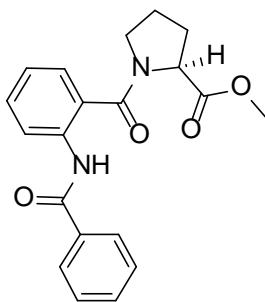

To an ice cold solution of 2-phenyl benzoxazinone<sup>3</sup> (1 g, 4.48 mmol) and proline methyl ester (1 g, 5.83 mmol) in dry DMF (20 ml) containing 4Å molecular sieves, DBU (2.05g, 2ml, 13.44mmol) was added drop wise. The reaction mixture was allowed to stir at 0 °C for 10 minutes and then for 3 h at room temperature. The reaction mixture was diluted with DCM, and the organic layer was washed with water and dried using an.  $\text{Na}_2\text{SO}_4$ . The crude product obtained after the removal of solvent under reduced pressure was purified by column chromatography (50:50 pet. ether/ethyl acetate,  $R_f$ : 0.5) to afford **11** (1.08 g, 68%), white solid, crystallized from a solution of diethyl ether and pet-ether; mp: 116-120 °C;  $[\alpha]_D^{25}$ :  $-50^\circ$  ( $c = 0.1$ ,  $\text{CHCl}_3$ ); IR ( $\text{CHCl}_3$ )  $\nu$  ( $\text{cm}^{-1}$ ) 3337, 3015, 2445, 1743, 1668, 1594, 1520, 1416, 1216;  $^1\text{H}$  NMR (400 MHz,  $\text{CDCl}_3$ )  $\delta$ : 10.32 (s, 1H), 8.53-8.57 (d,  $J = 8.49$  Hz, 1H), 7.90-7.95 (m, 2H), 7.34-7.53 (m, 5H), 7.06-7.13 (m, 1H), 4.61-4.67 (m, 1H), 3.51-3.73 (m, 2H), 3.66 (s, 3H), 2.20-2.38 (m, 1H), 1.73-2.06 (m, 3H);  $^{13}\text{C}$  NMR (50 MHz,  $\text{CDCl}_3$ )  $\delta$ : 172.2, 168.9, 165.2, 162.4, 137.2, 134.3, 131.7, 131.2, 128.4, 127.4, 127.2, 123.6, 122.6, 121.7, 59.1, 52.1, 50.3, 36.3, 31.2, 29.0, 25.0; LC-MS: 375.05 ( $\text{M}+\text{Na}$ ) $^+$ ; Elemental analyses calculated for  $\text{C}_{20}\text{H}_{20}\text{N}_2\text{O}_4$ : C, 68.17; H, 5.72; N, 7.95; Found: C, 68.43; H, 5.43; N, 7.68.

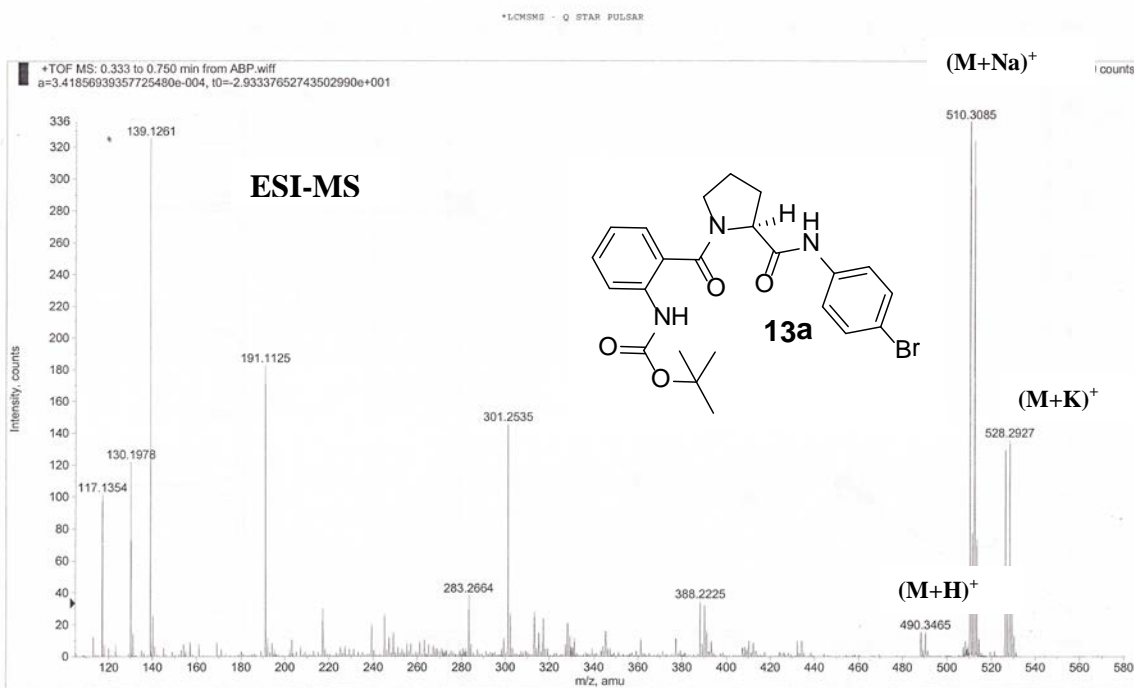

F:\DATA\Sanjayan\Sanjayan-Nov2011\AABP

11/4/2011 3:42:44 PM

AABP #13-77 RT: 0.11-0.67 AV: 65 SB: 18 0.00-0.08, 0.84-0.90 NL: 2.91FR  
T: (0,0) + c ESI corona sid=80.00 det=1200.00 Full ms [ 50.00-700.00]

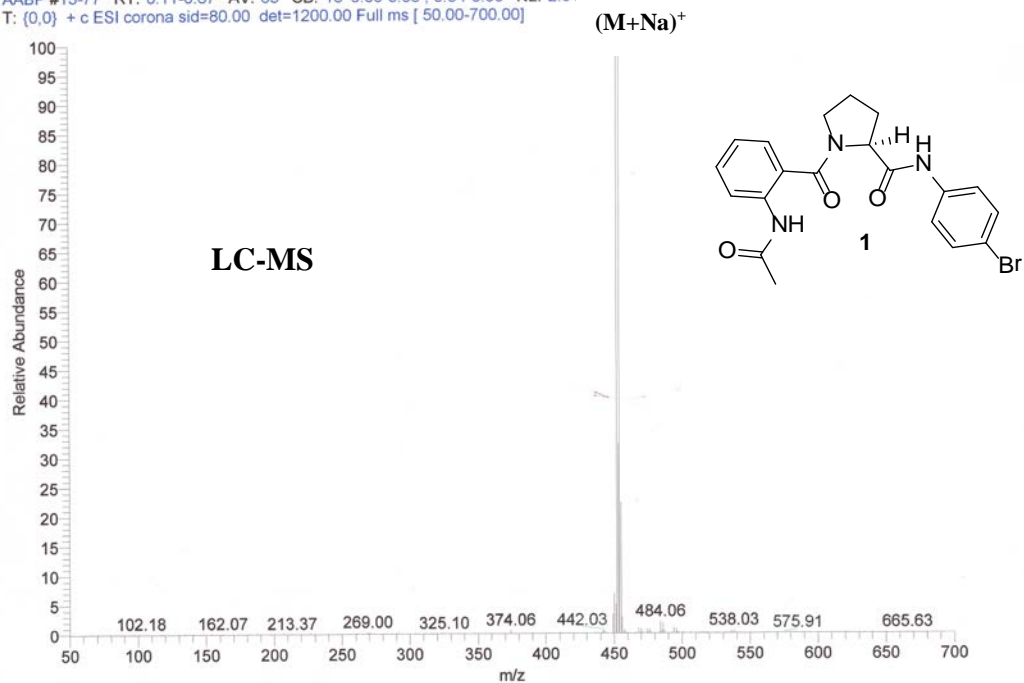

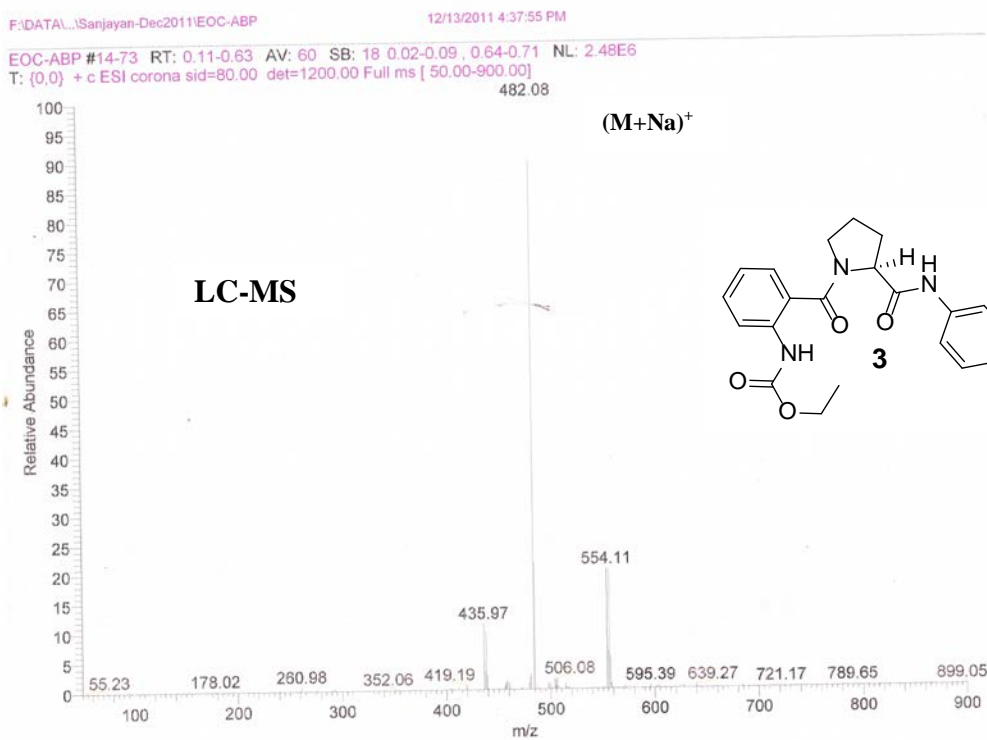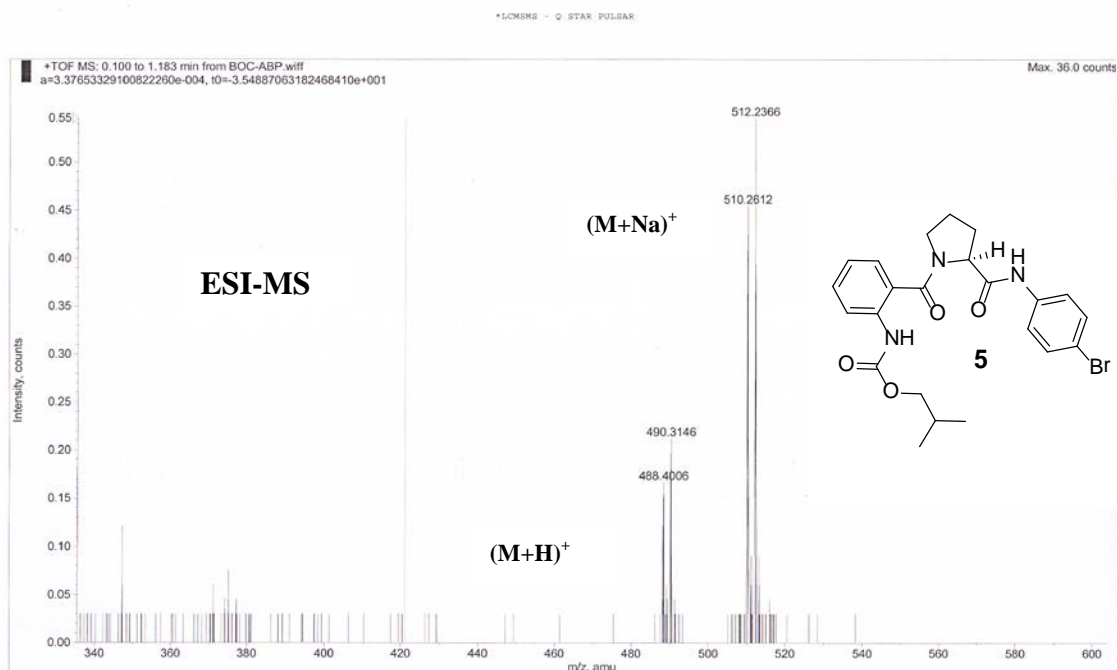

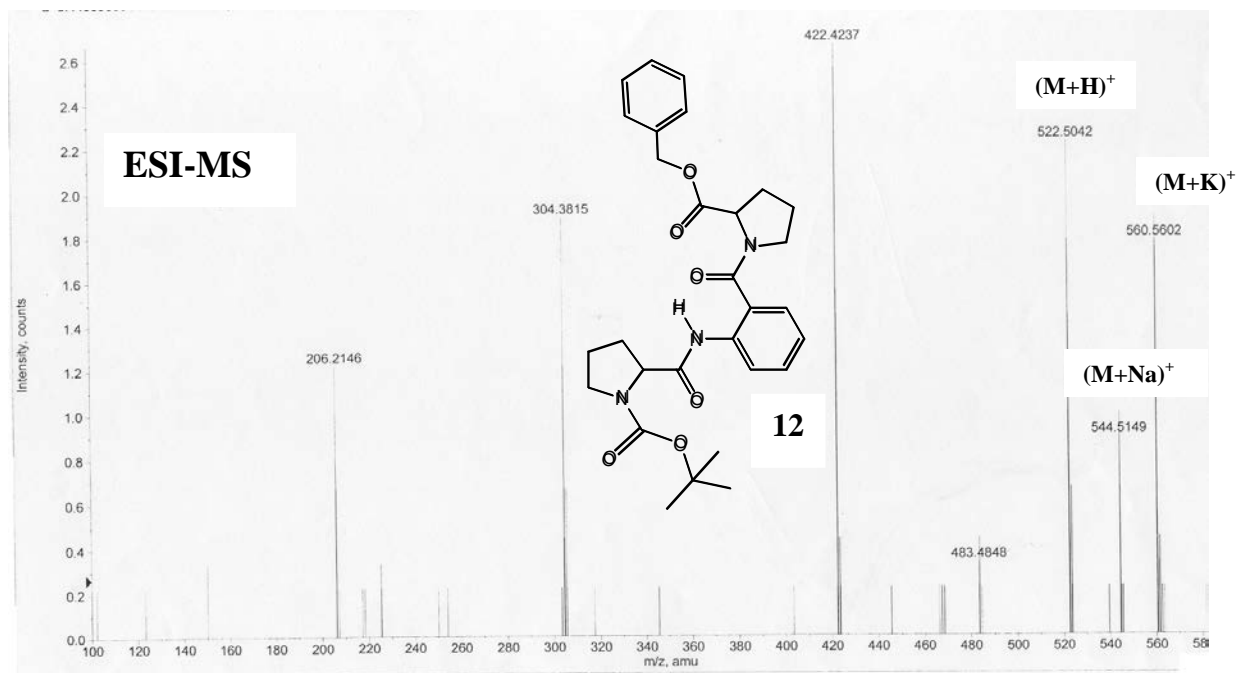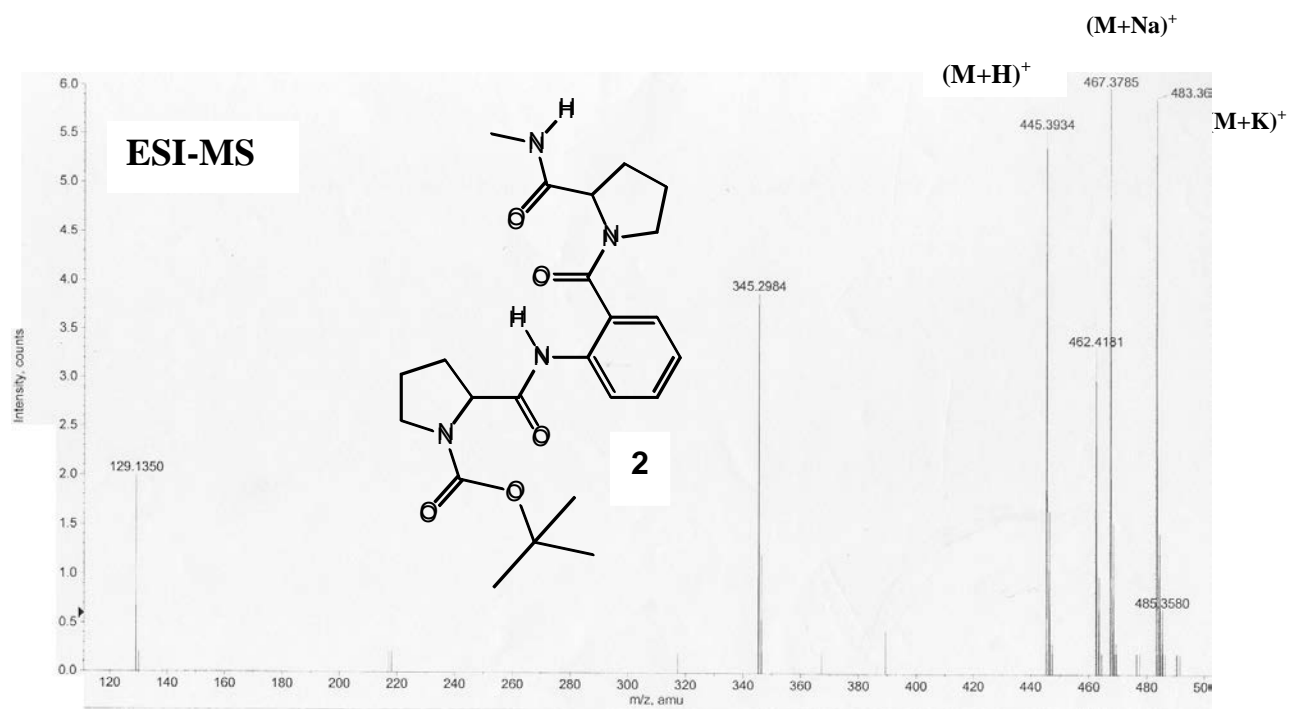

F:\DATA\...\Sanjayan-Nov2011\BOC-AP-OMe

11/8/2011 3:15:29 PM

BOC-AP-OMe #12-76 RT: 0.10-0.67 AV: 65 SB: 17 0.00-0.09, 0.67-0.71 NL: 1.01E7  
T: {0,0} + c ESI corona sid=80.00 det=1200.00 Full ms [ 100.00-800.00]

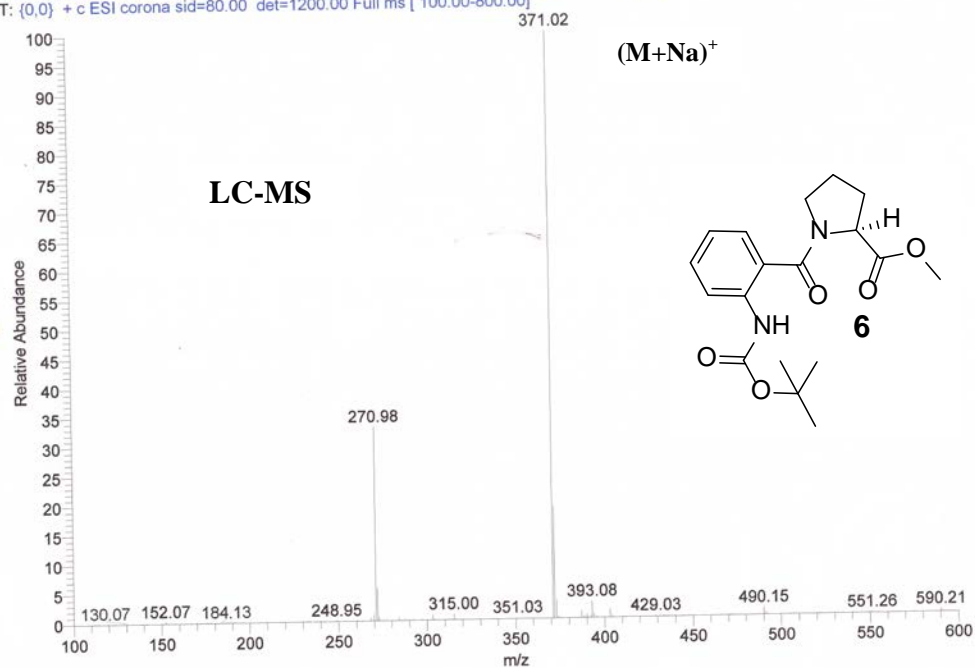

F:\DATA\...\Sanjayan-Nov2011\10C-AP-OMe

11/4/2011 3:53:14 PM

10C-AP-OMe #14-69 RT: 0.12-0.60 AV: 56 SB: 15 0.00-0.08, 0.71-0.74 NL: 1.98E7  
T: {0,0} + c ESI corona sid=80.00 det=1200.00 Full ms [ 50.00-700.00]

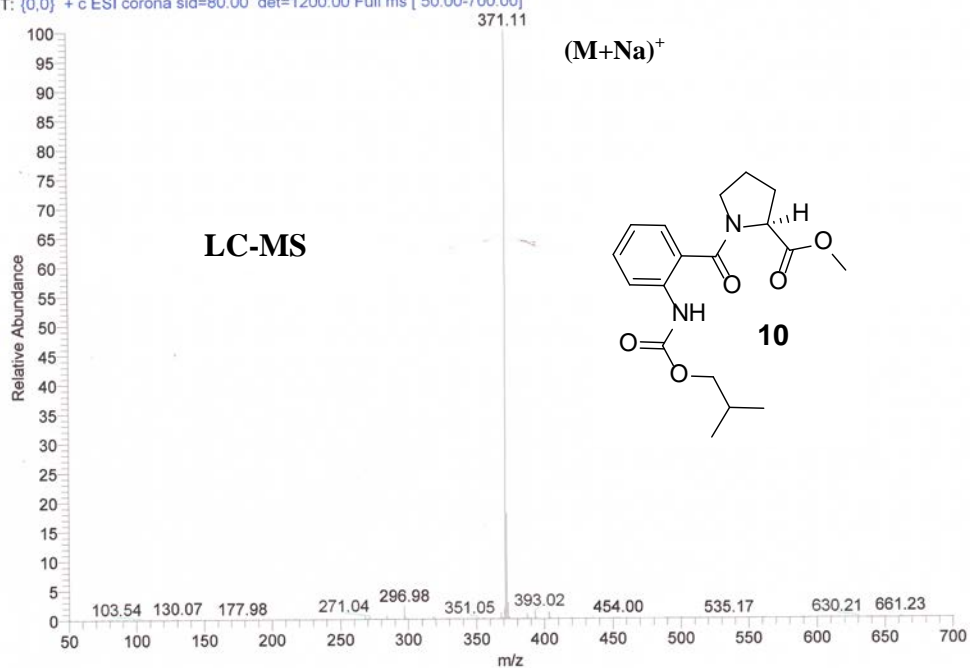



F:\DATA\...\Sanjayan-Dec2011\EOC-A

12/9/2011 3:58:14 PM

EOC-AP-OJFE #15-52 RT: 0.12-0.45 AV: 38 SB: 17 0.00-0.08 , 0.53-0.58 NL: 3.86E6  
T: (0,0) + c ESI corona sid=80.00 det=1200.00 Full ms [ 50.00-900.00]

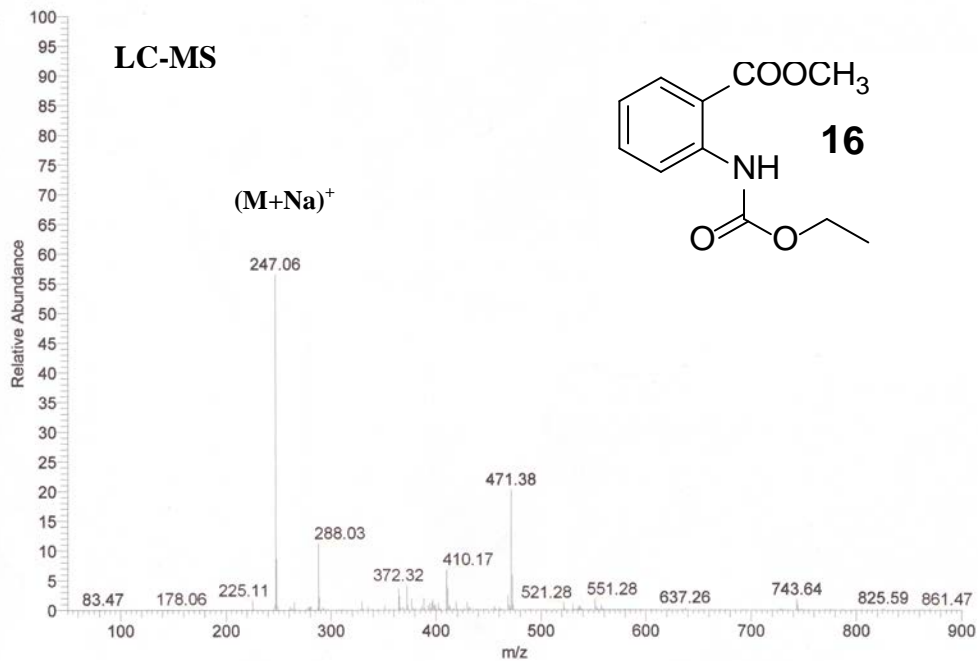

F:\DATA\...\Sanjayan-Nov2011\EOC-AP-OMe

11/3/2011 5:23:55 PM

EOC-AP-OMe #14-61 RT: 0.11-0.53 AV: 48 SB: 15 0.00-0.08 , 0.55-0.59 NL: 1.26E7  
T: (0,0) + c ESI corona sid=80.00 det=1200.00 Full ms [ 100.00-1000.00]

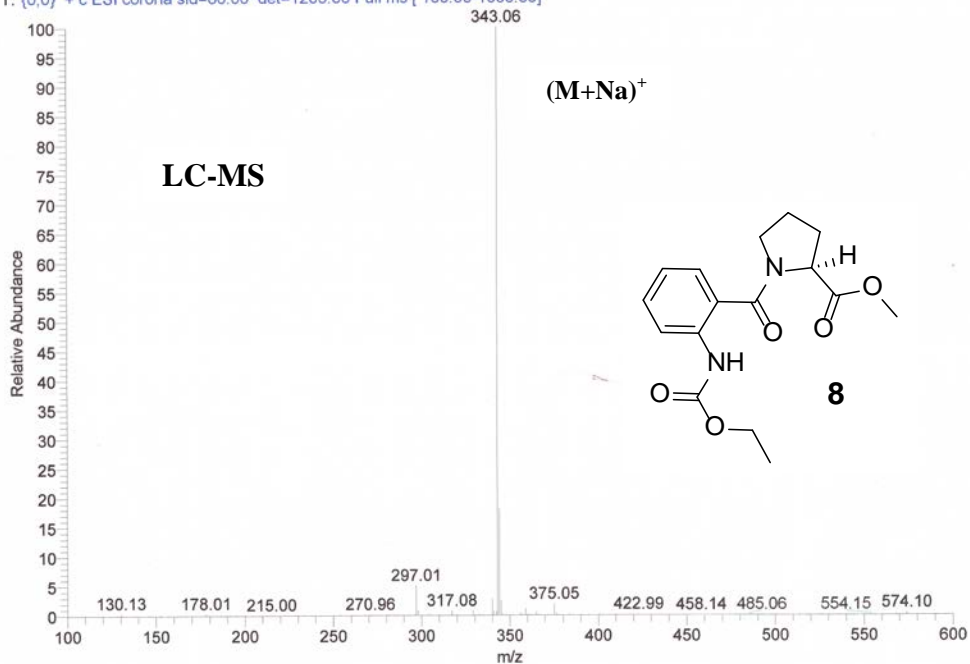

## ESI-MS

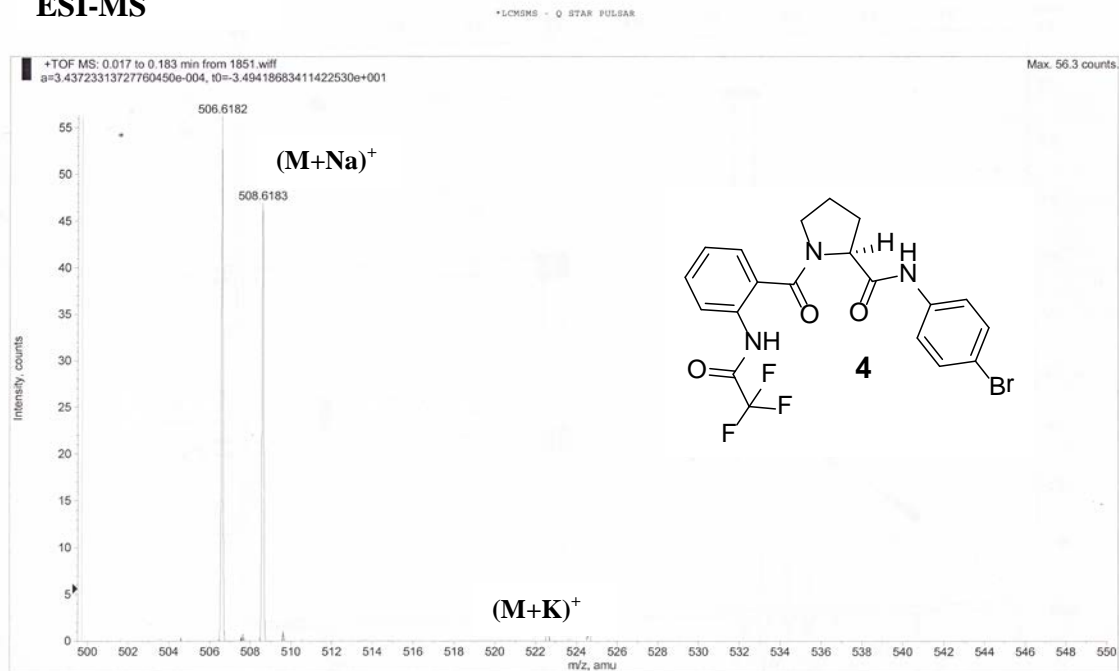

F:\DATA\...Sanjayan-Nov2011\ABP-OMe

11/8/2011 3:23:59 PM

ABP-OMe #14-78 RT: 0.12-0.68 AV: 65 SB: 17 0.02-0.08 0.80-0.87 NL: 1.22E7  
T: {0,0} + c ESI corona sid=80.00 det=1200.00 Full ms [ 100.00-800.00]

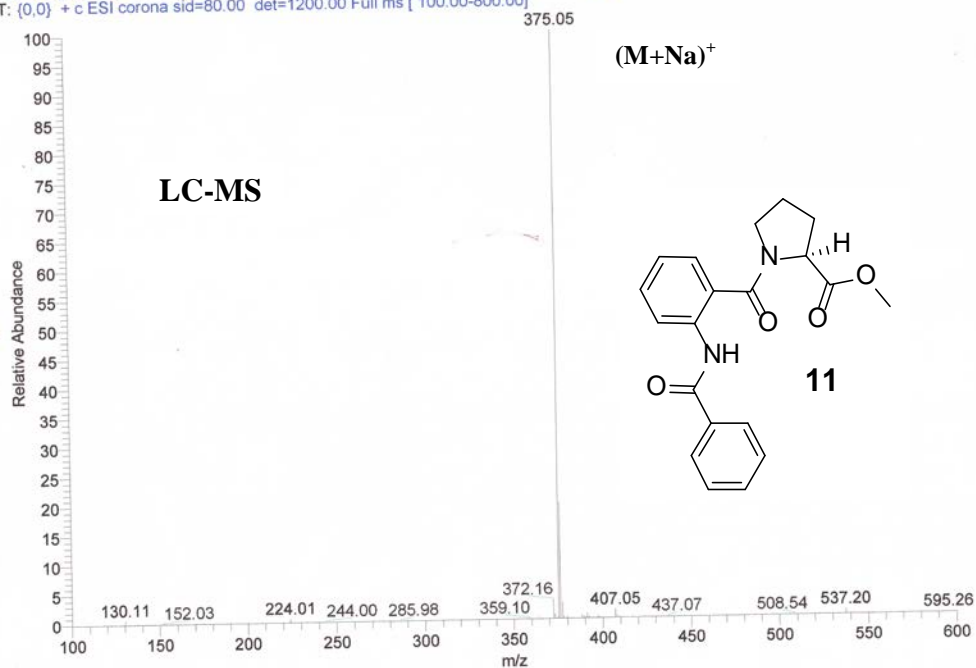

F:\DATA\...Sanjayan-Dec2011\EOC-AP-OB

12/9/2011 3:48:54 PM

EOC-AP-OB #13-66 RT: 0.11-0.57 AV: 54 SB: 19 0.00-0.11, 0.60-0.63 NL: 1.02E7  
T: (0,0) + c ESI corona sid=80.00 det=1200.00 Full ms [ 50.00-900.00]

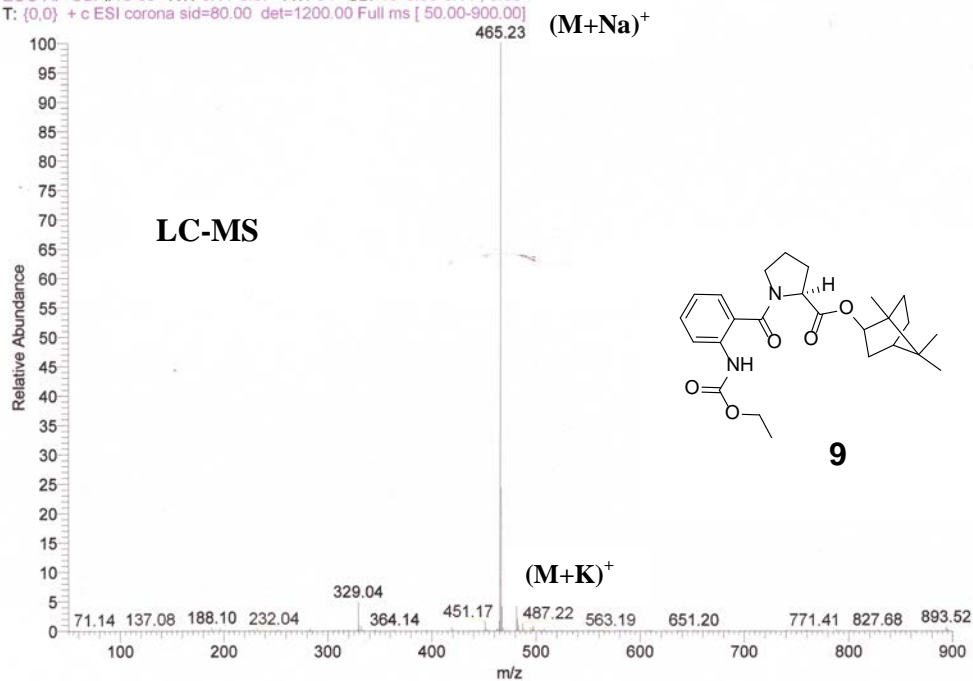

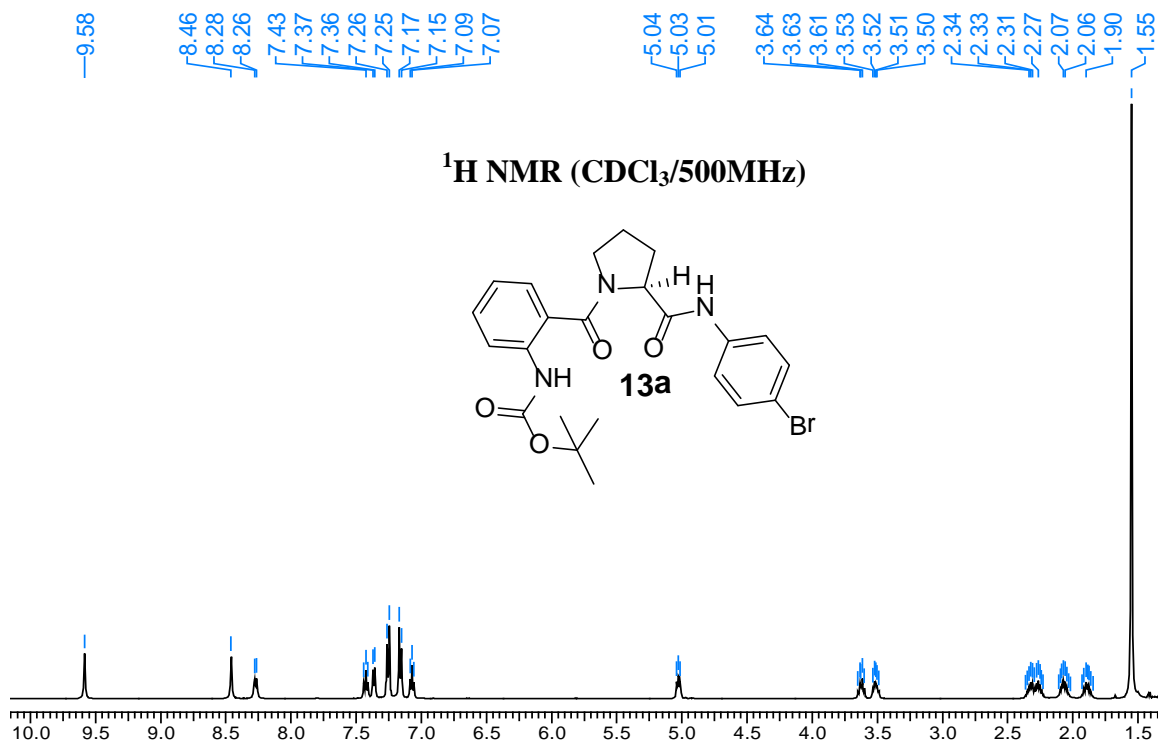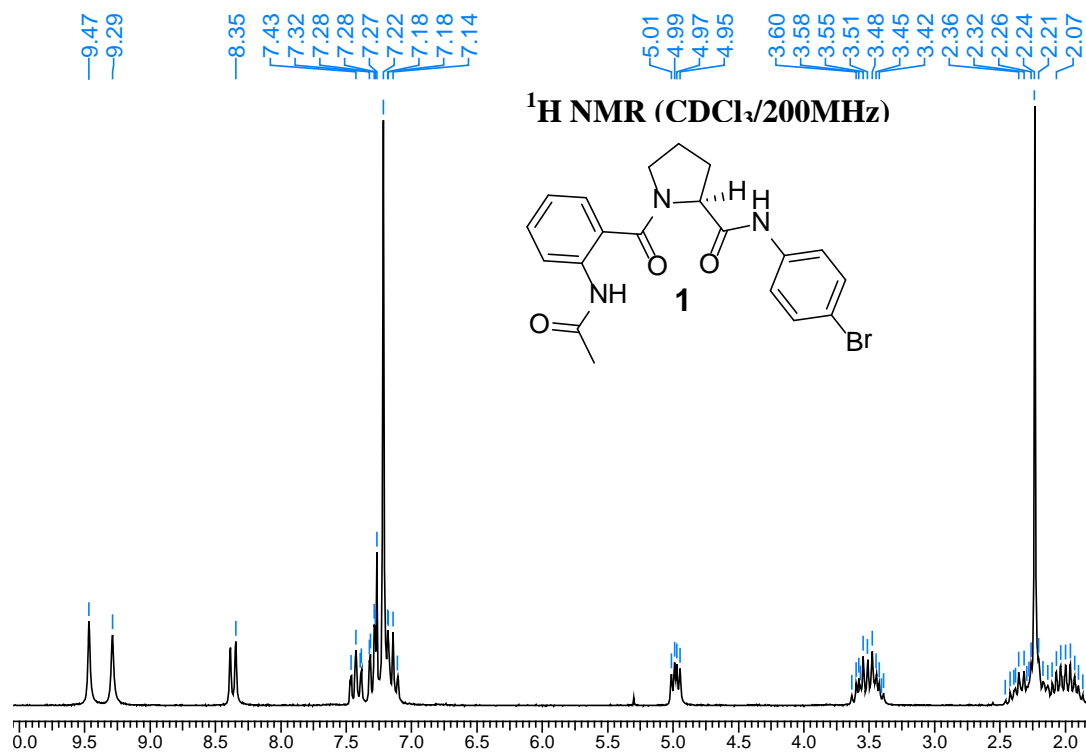

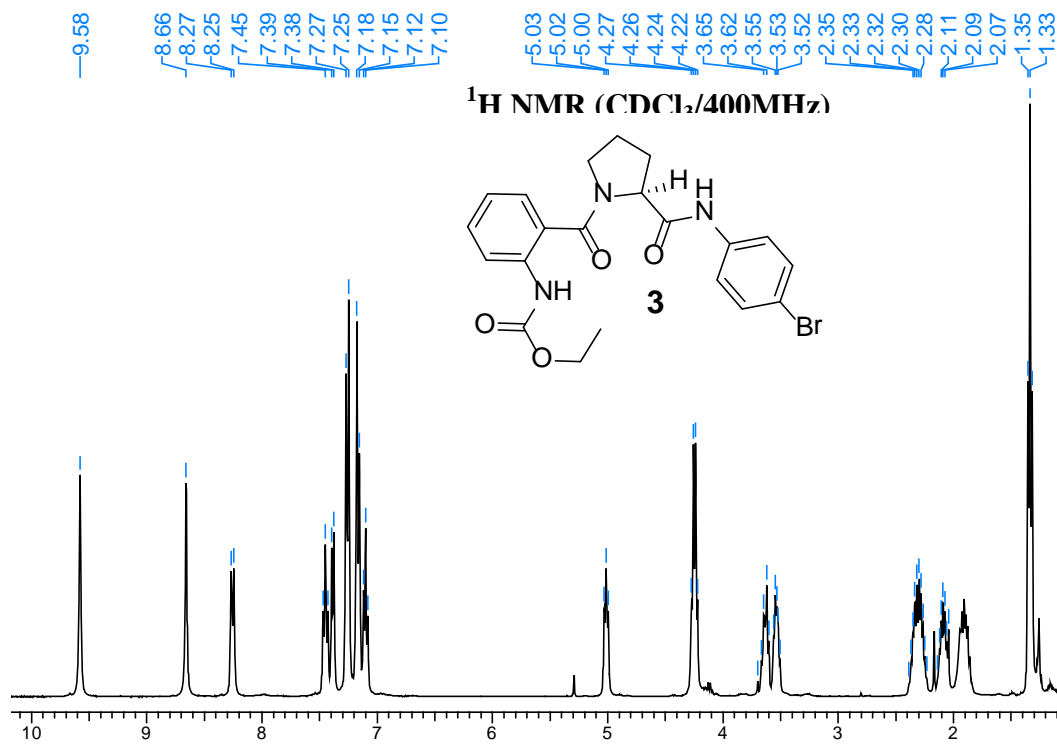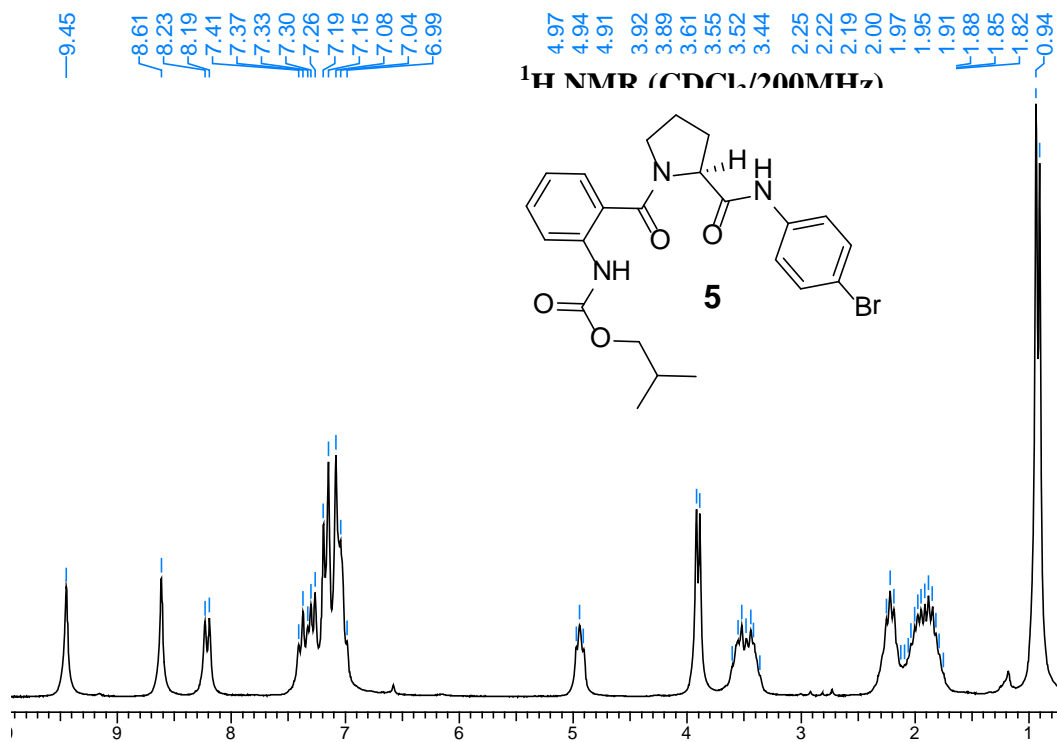

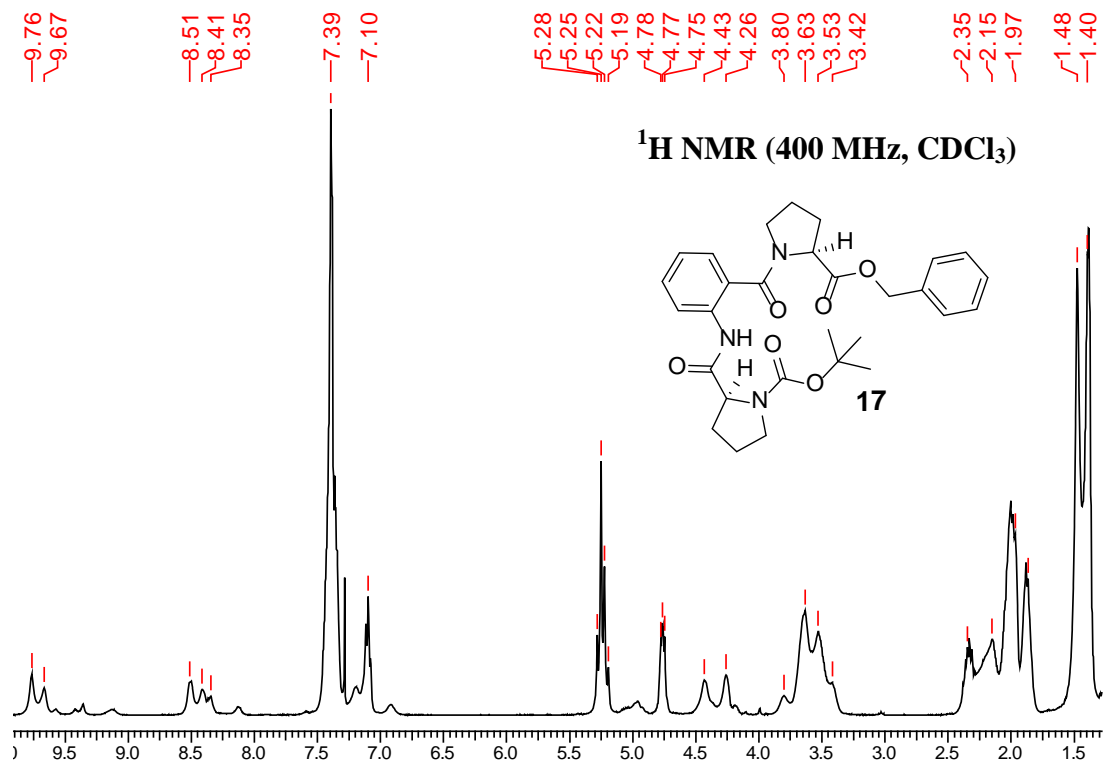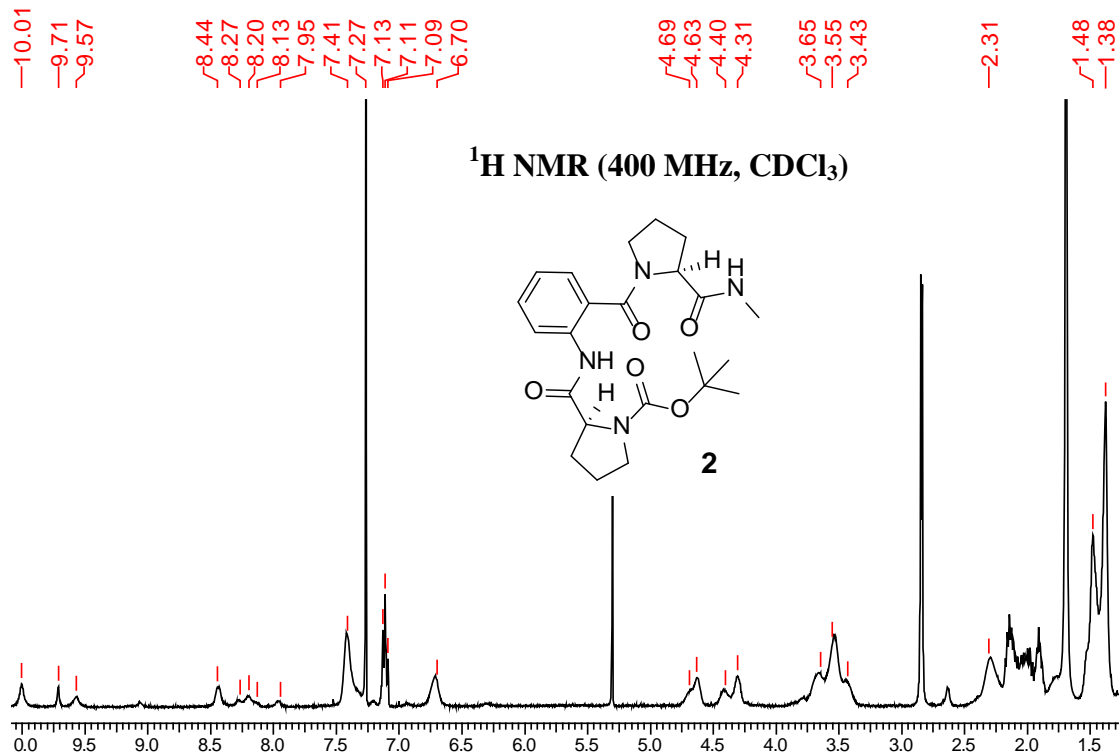

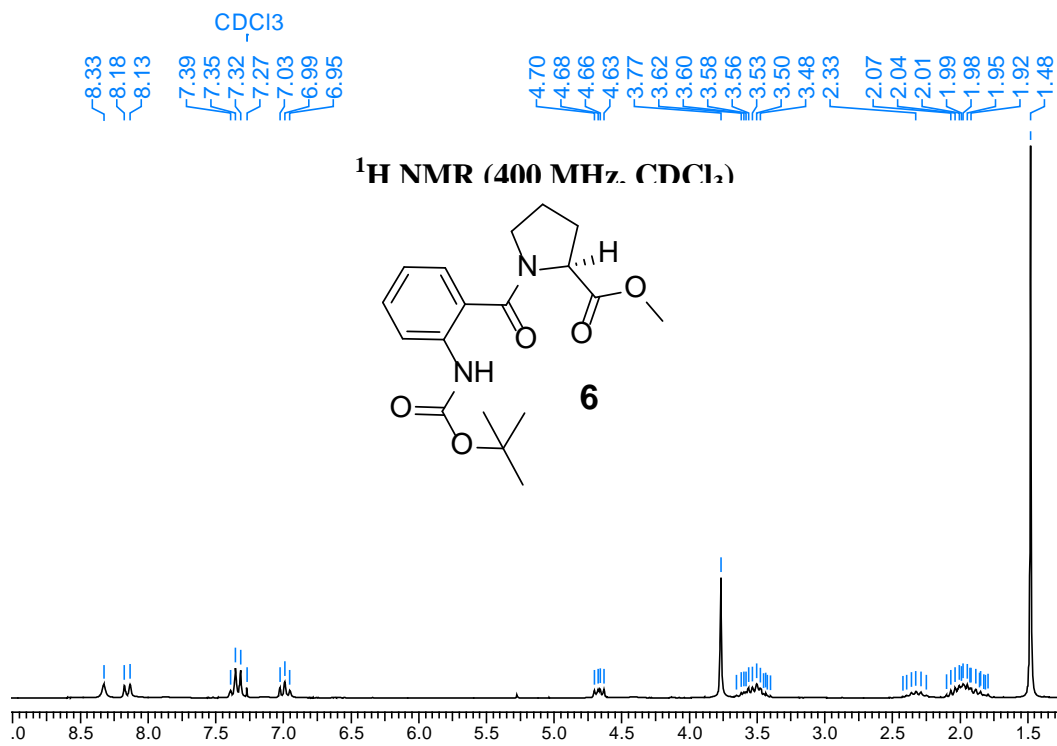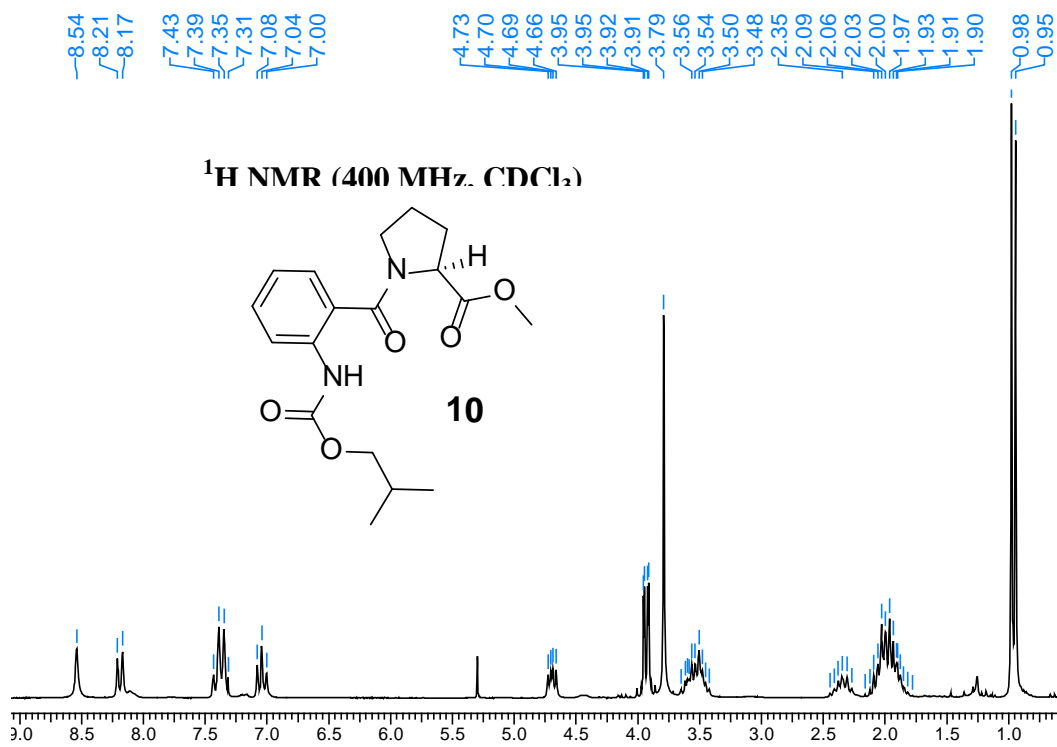

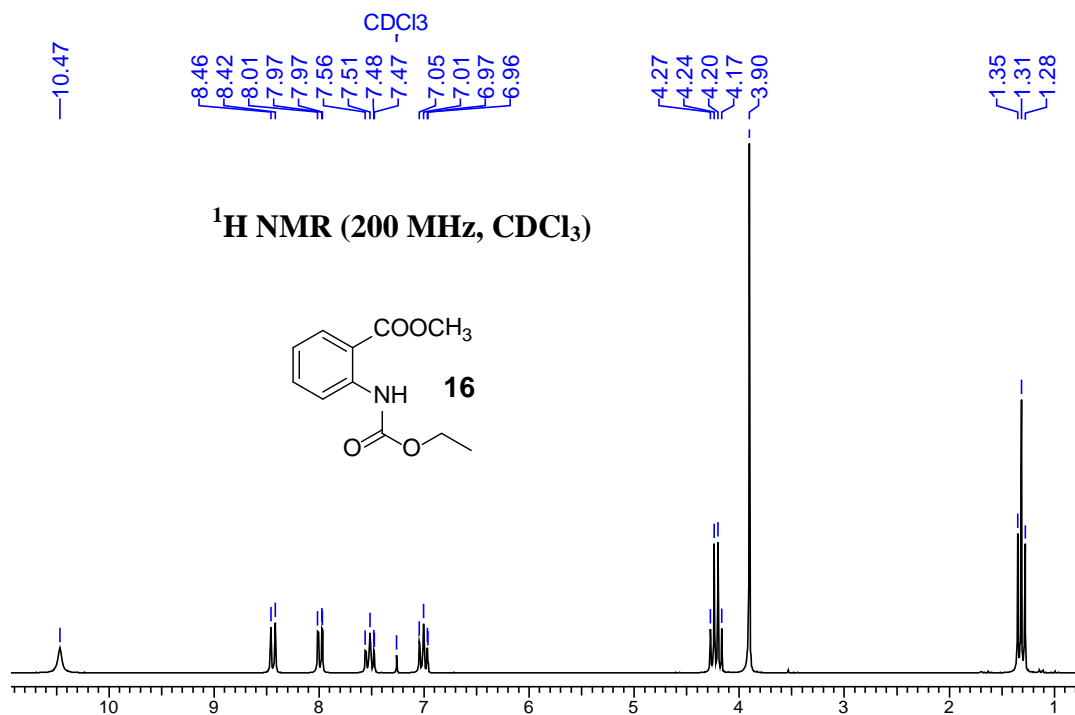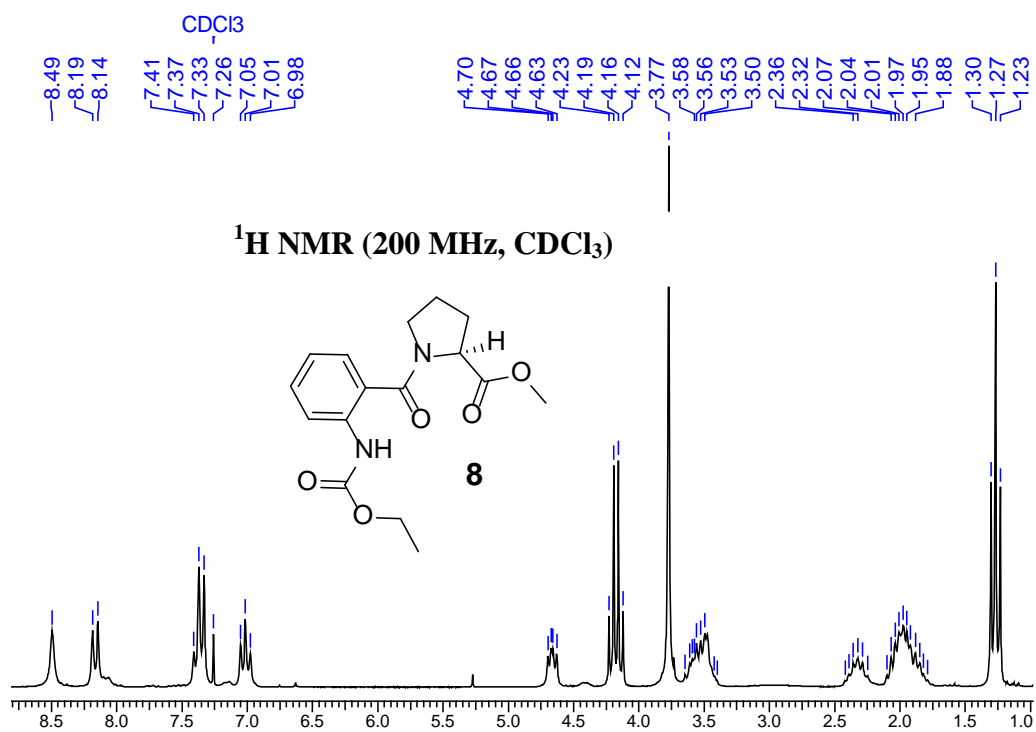



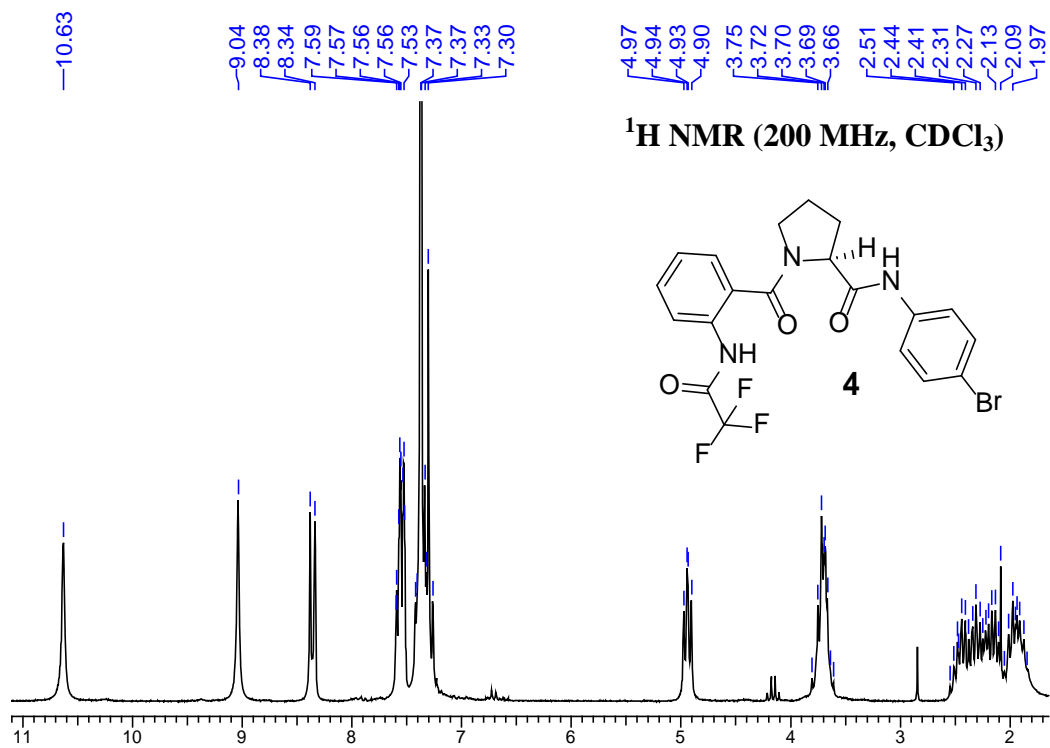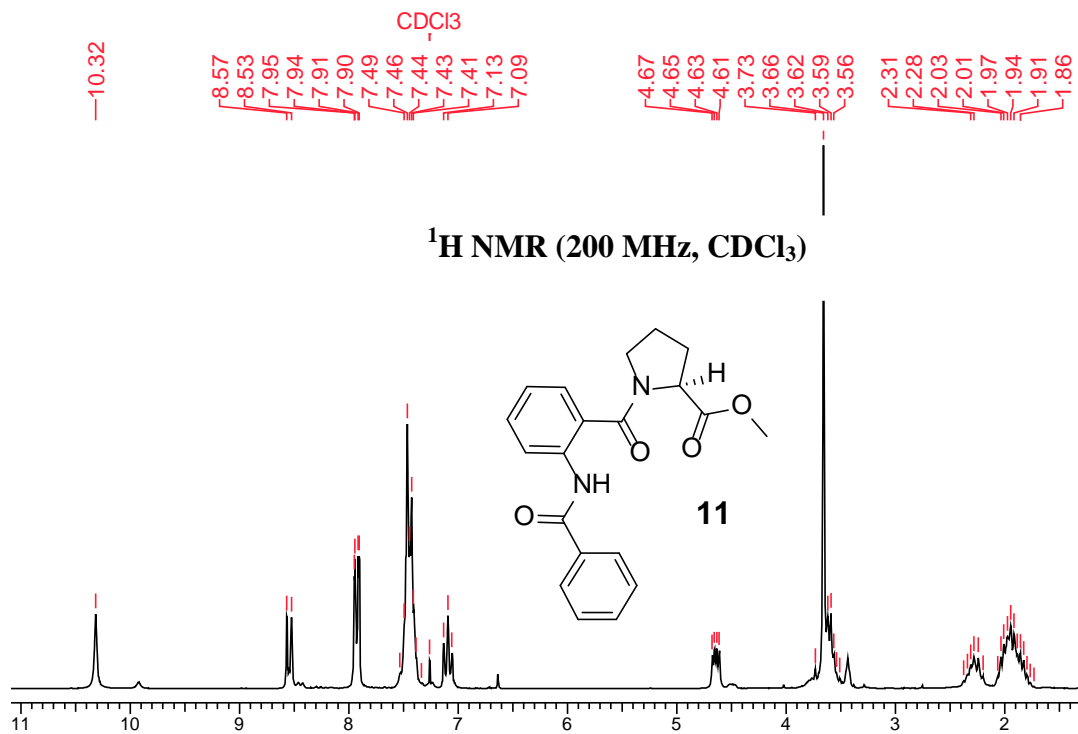

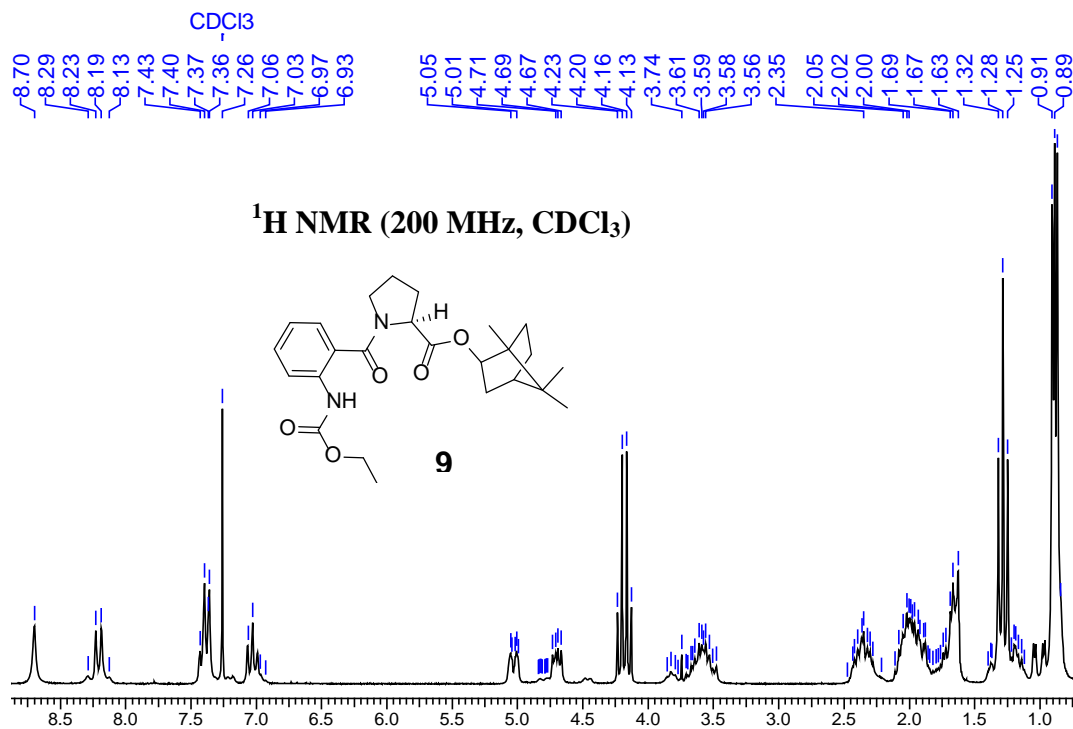

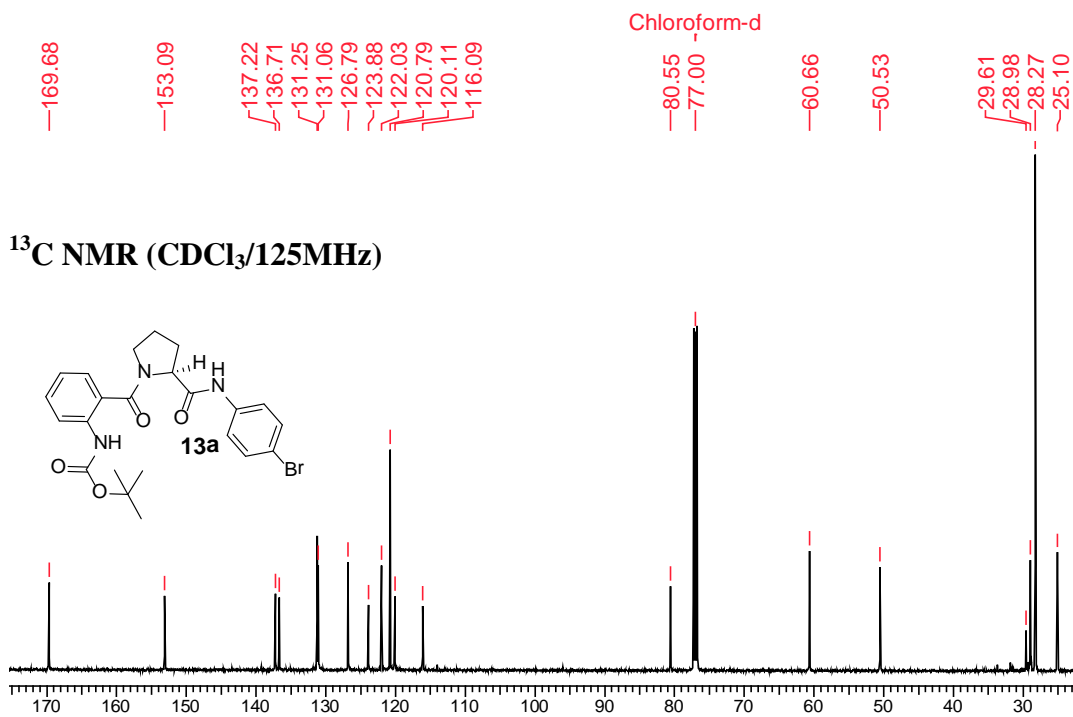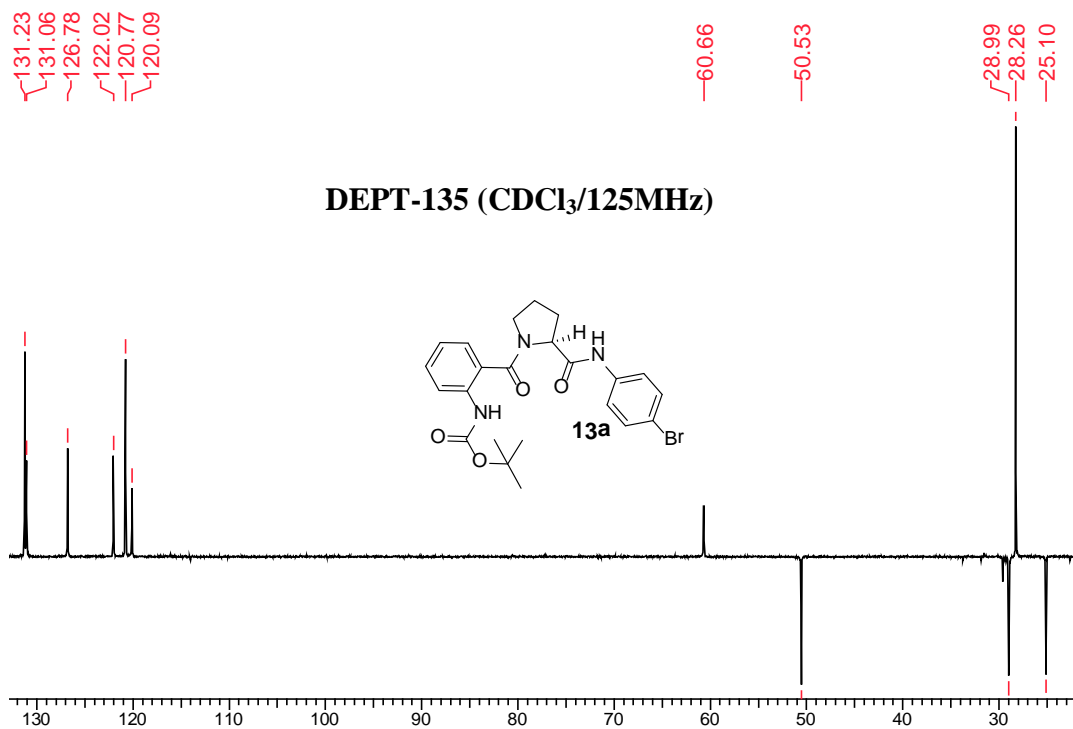

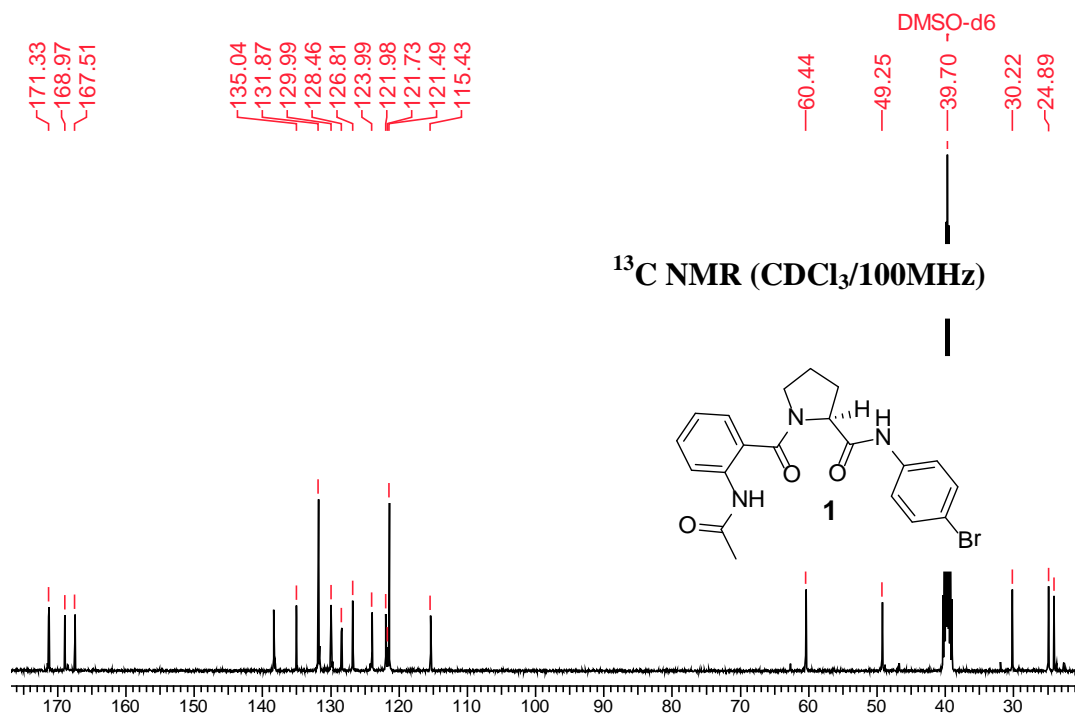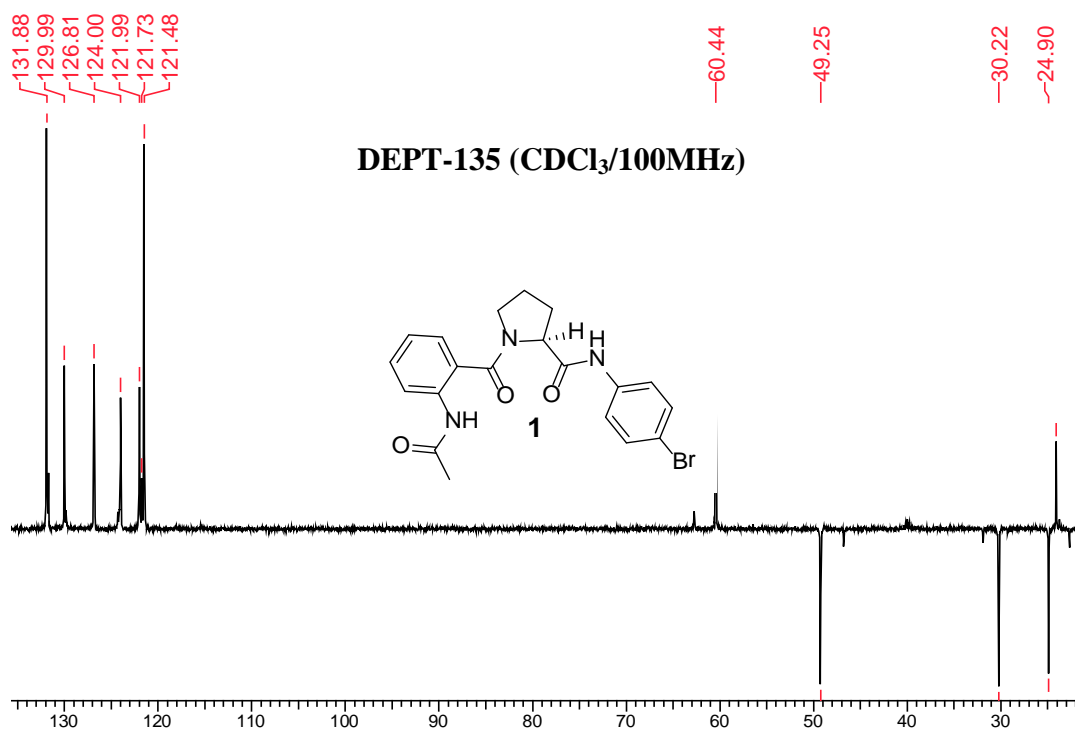

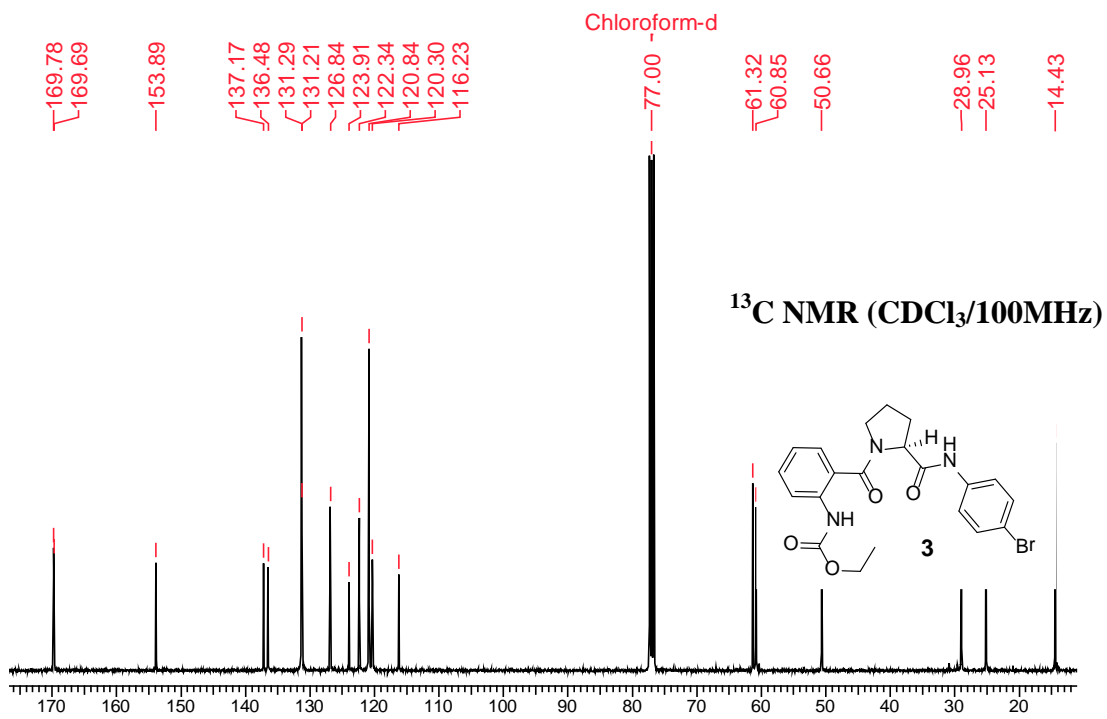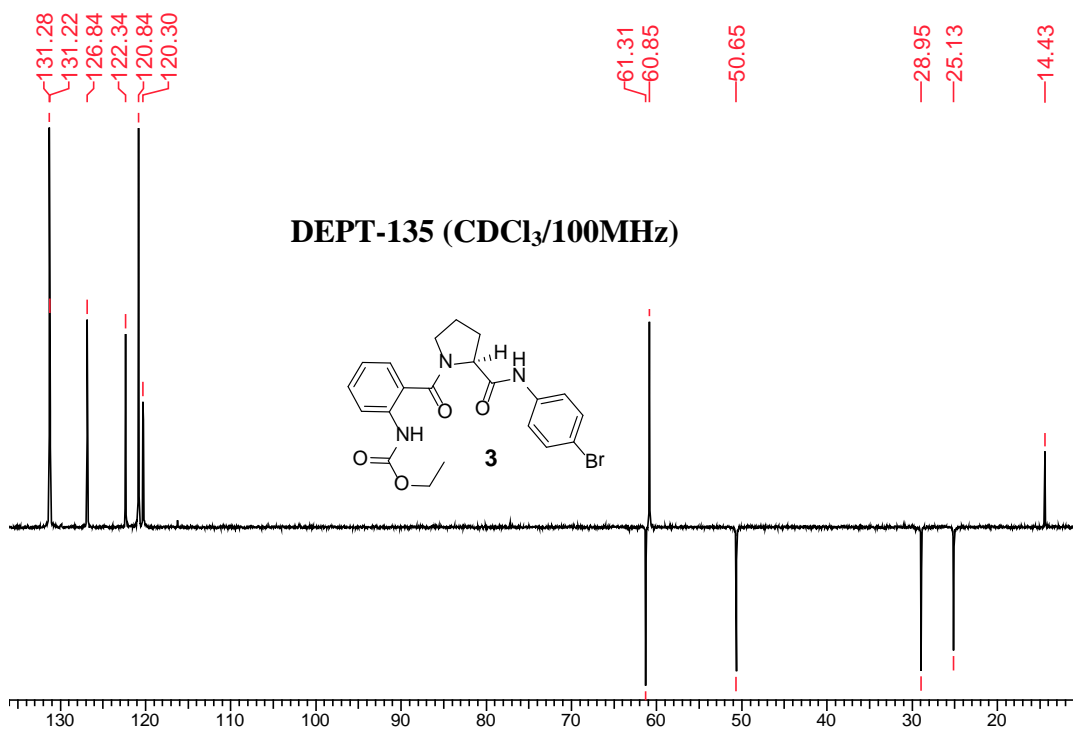

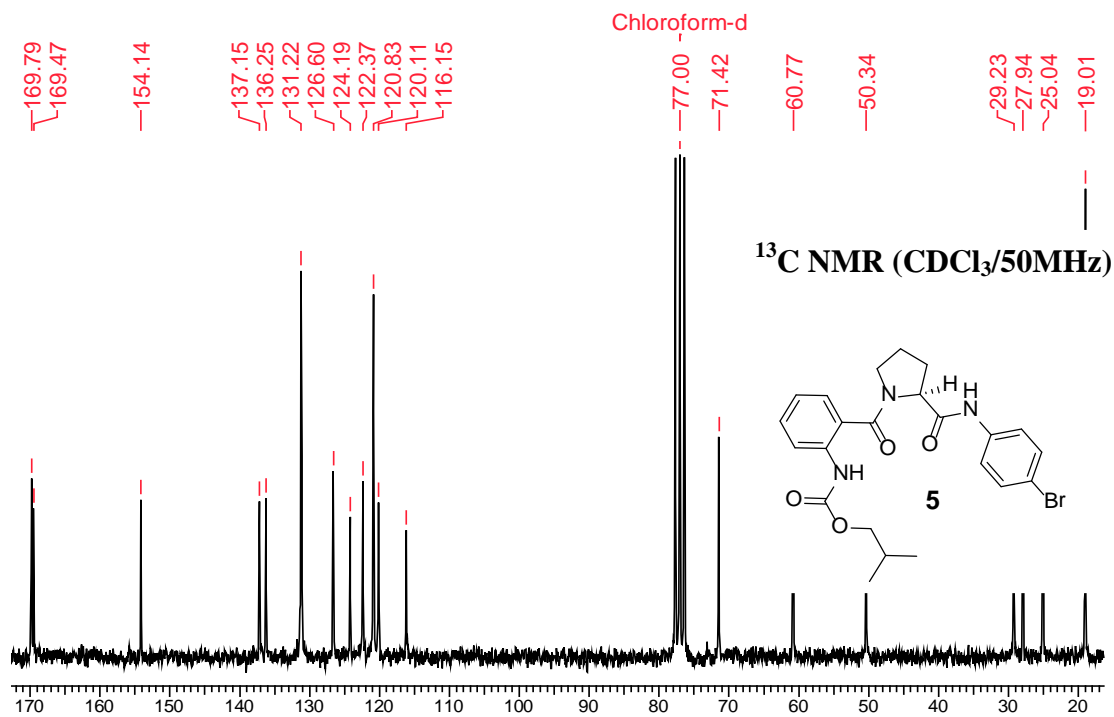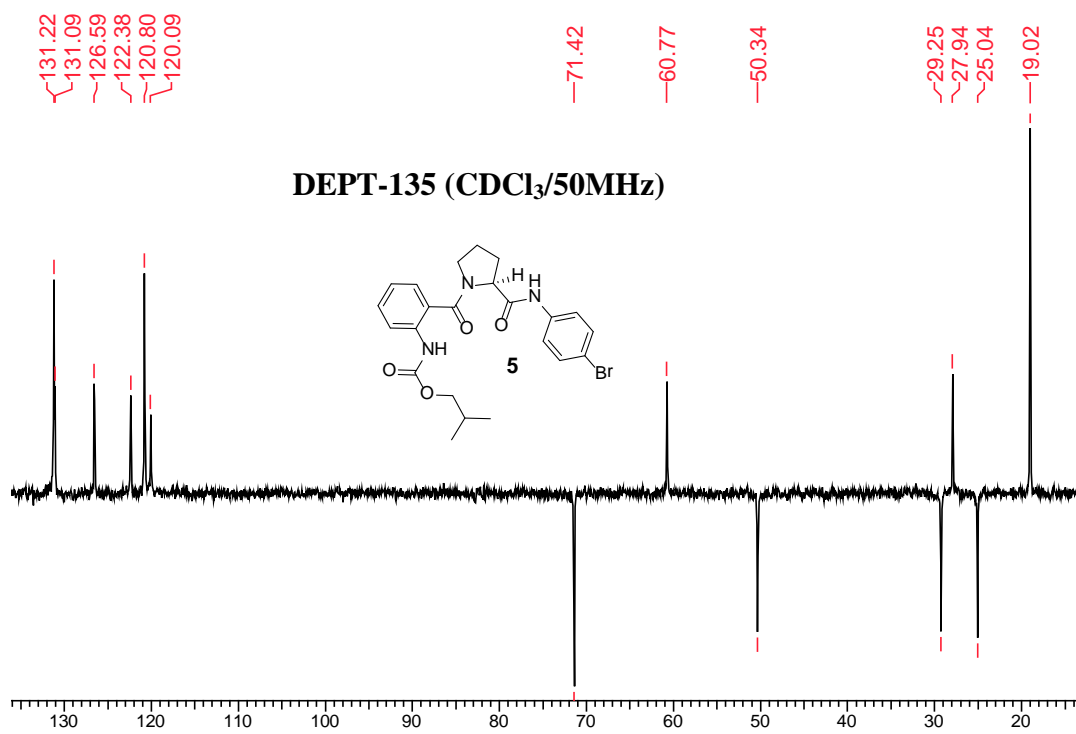

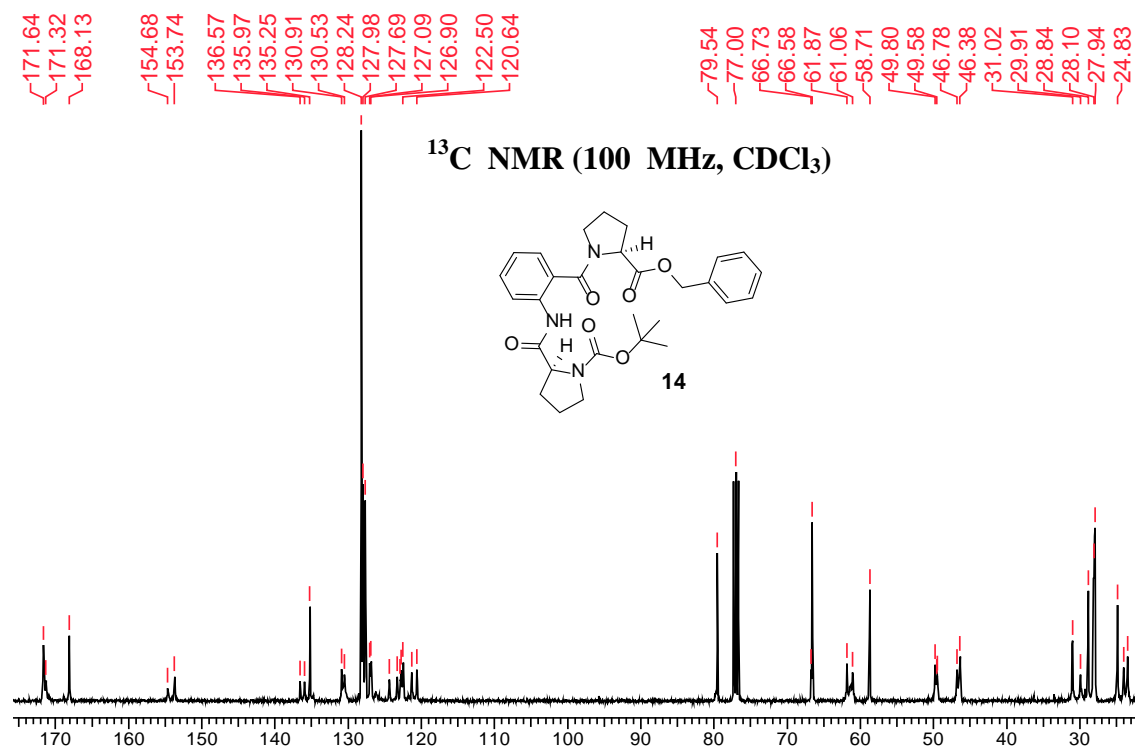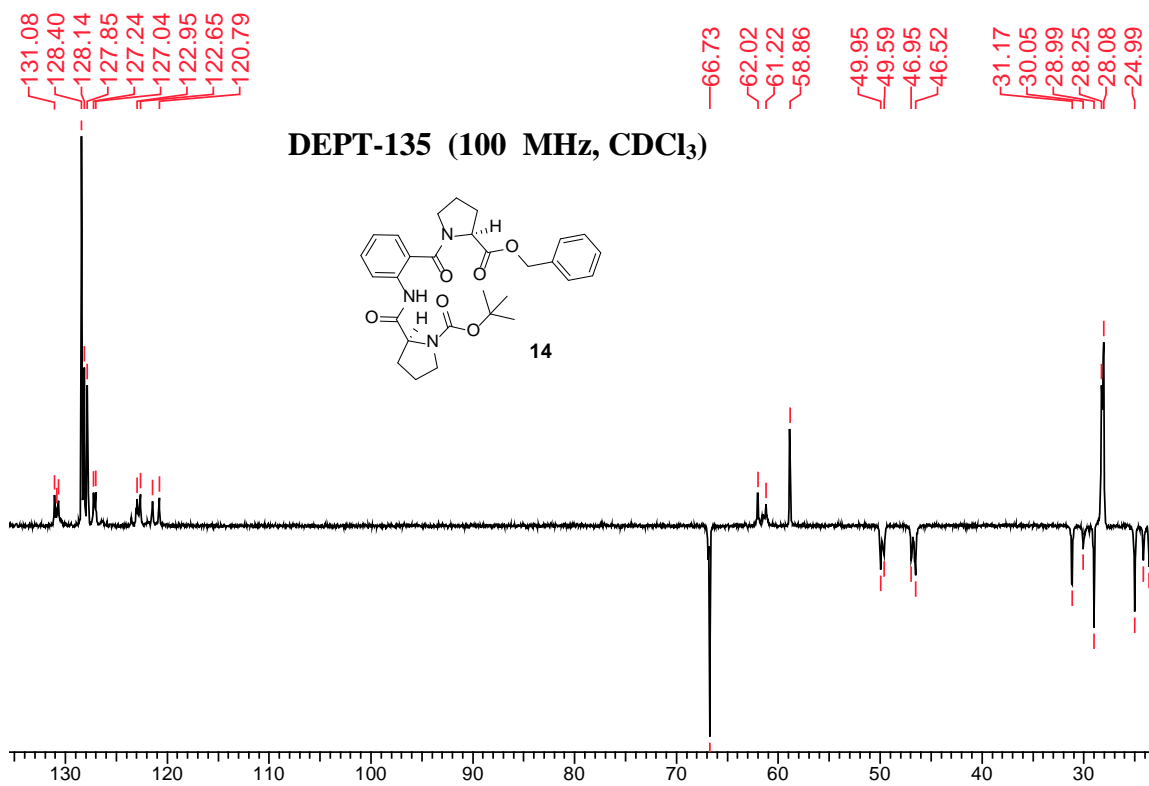

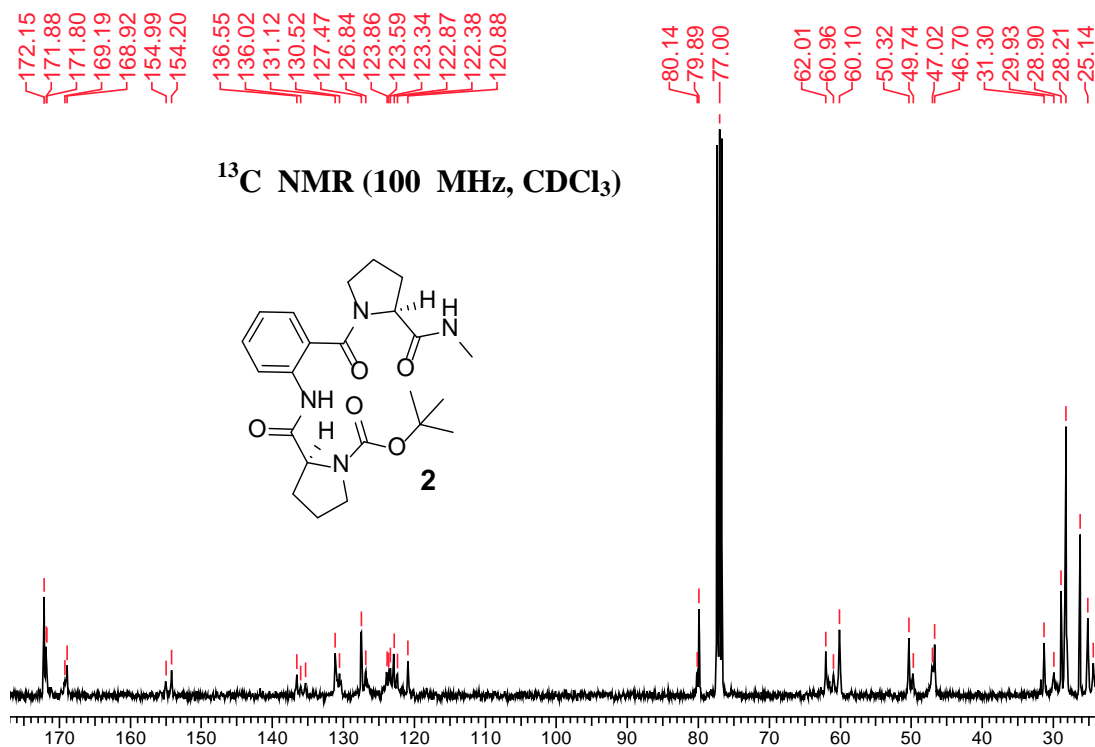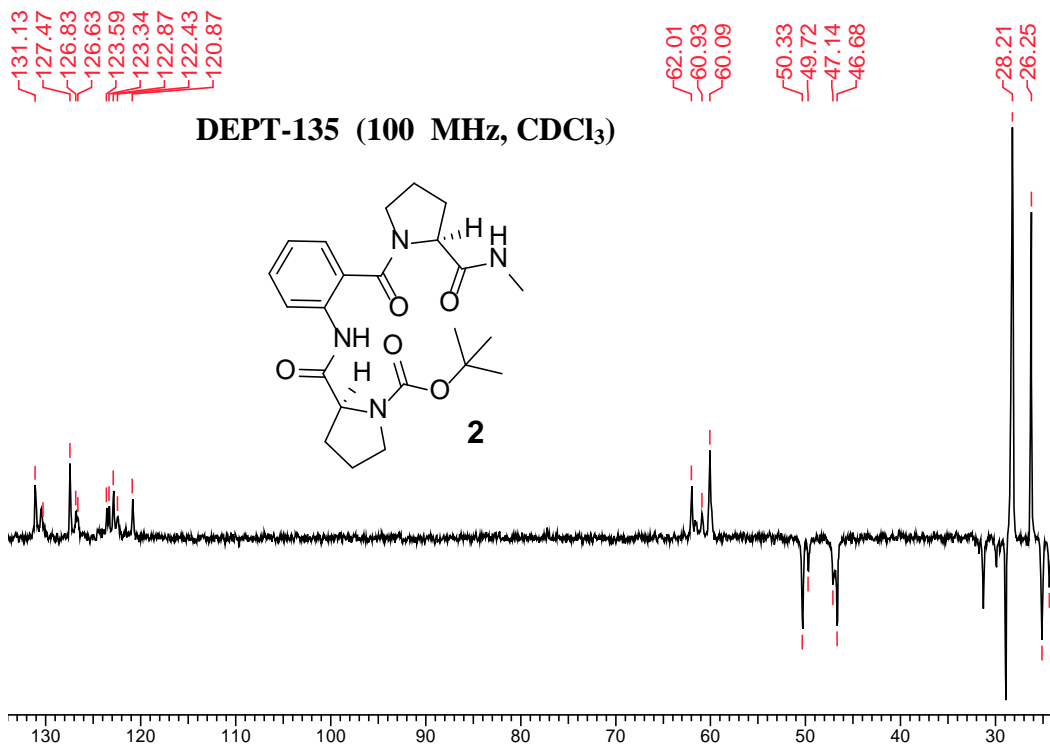



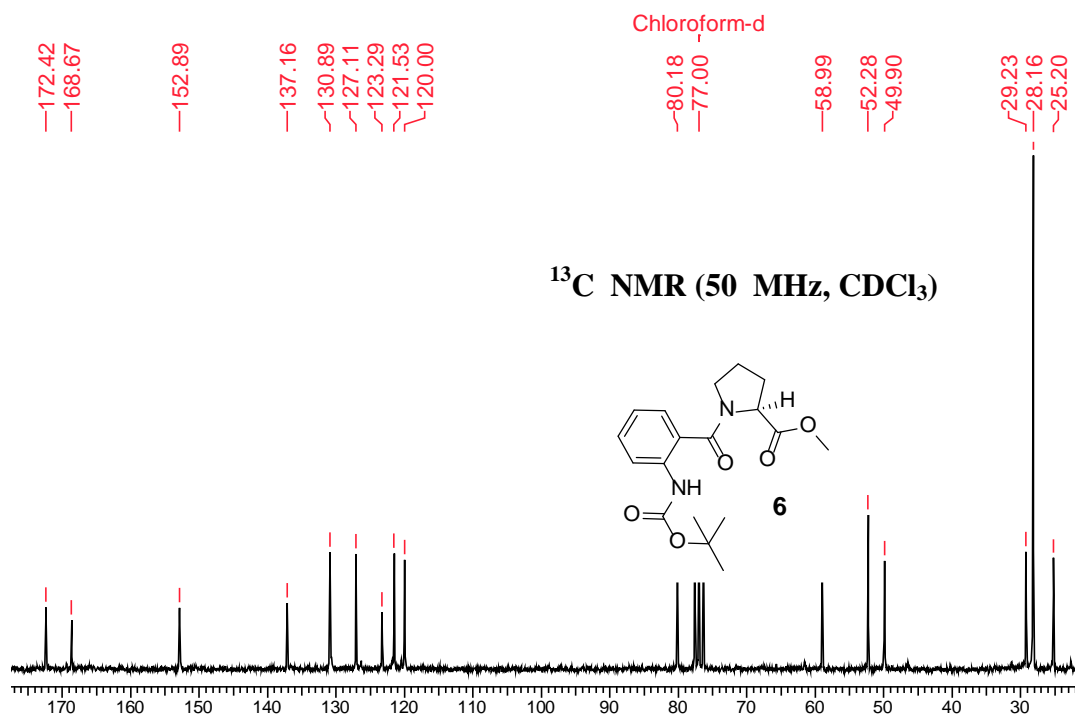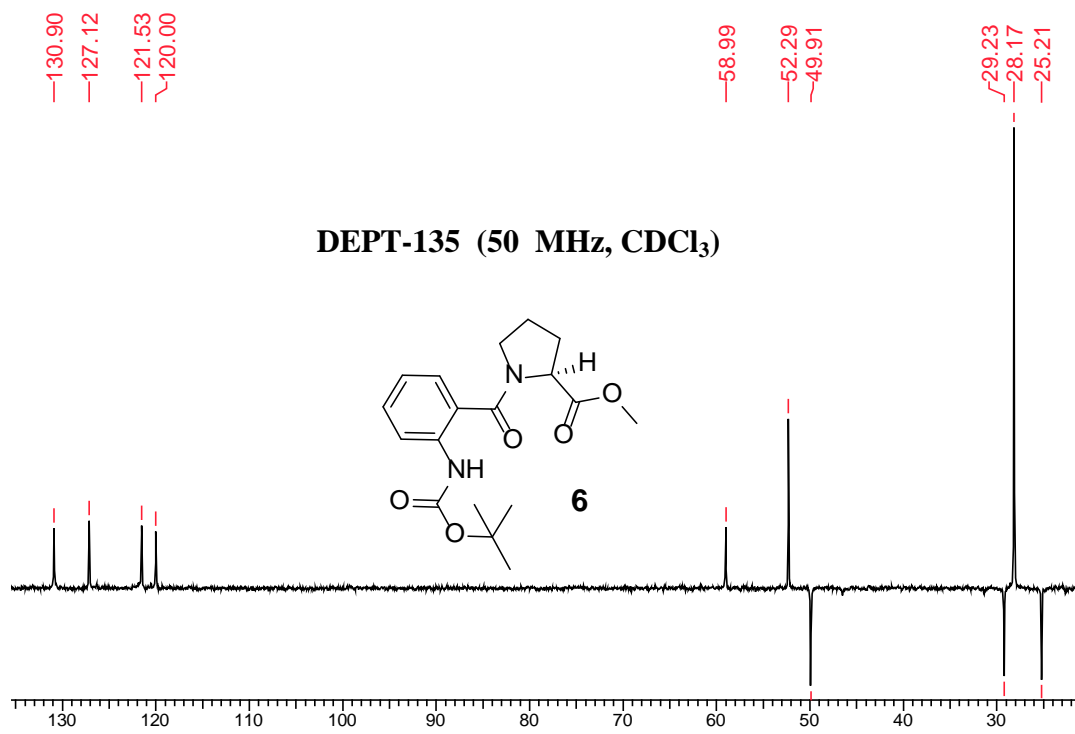

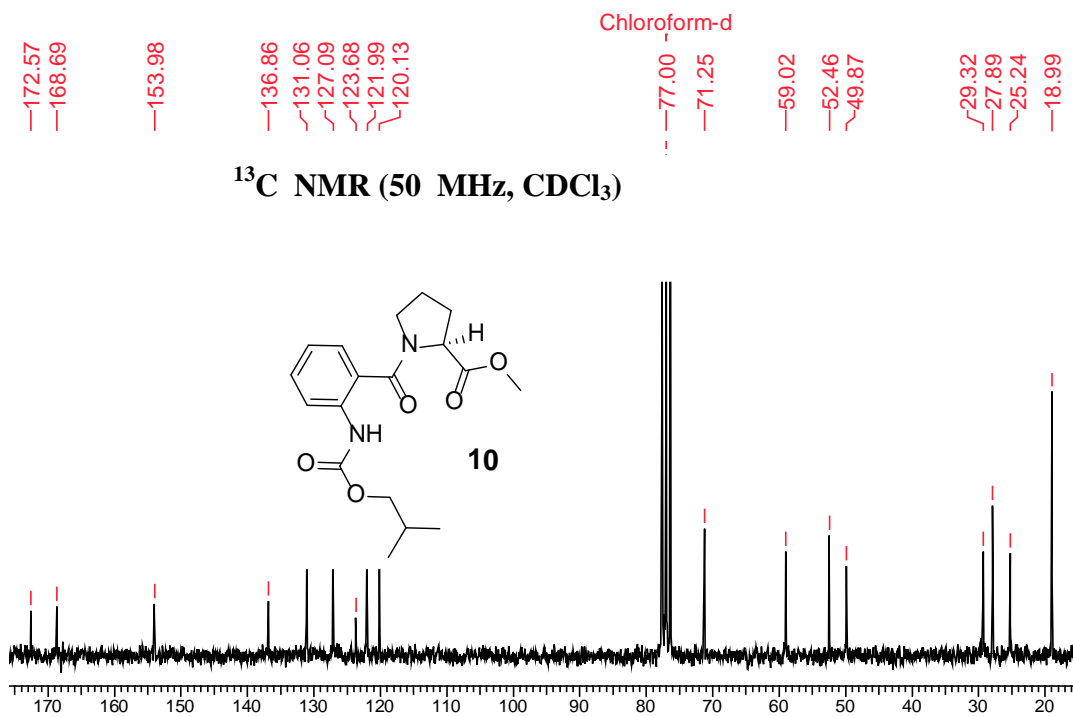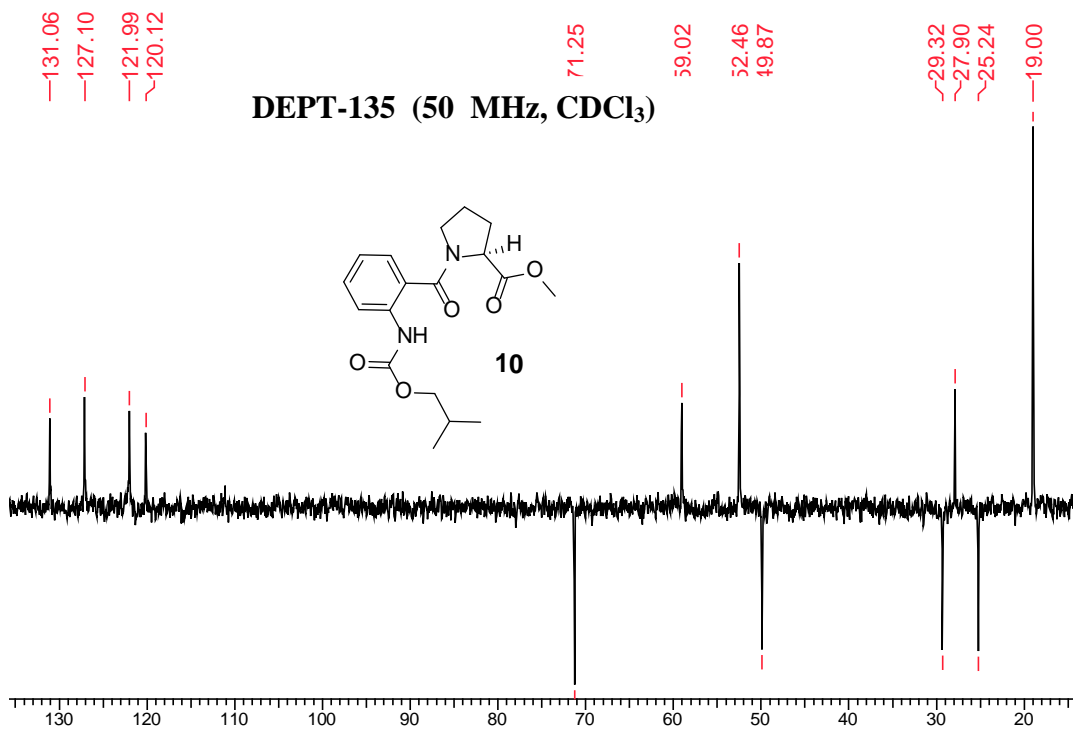

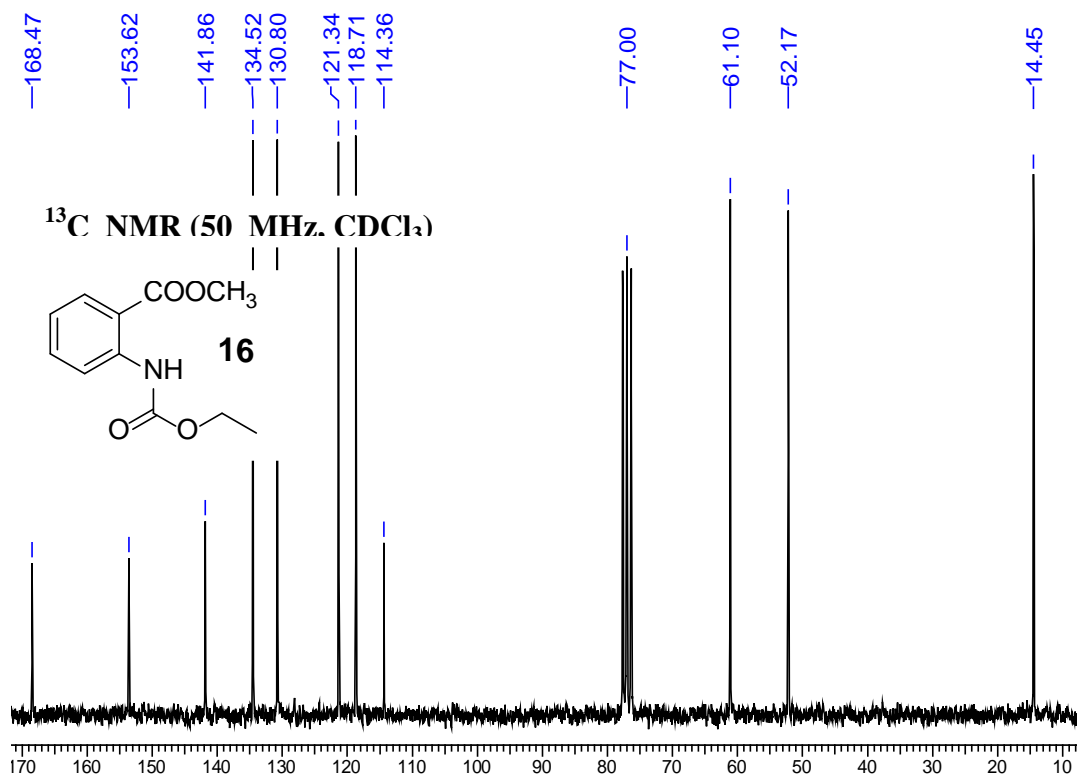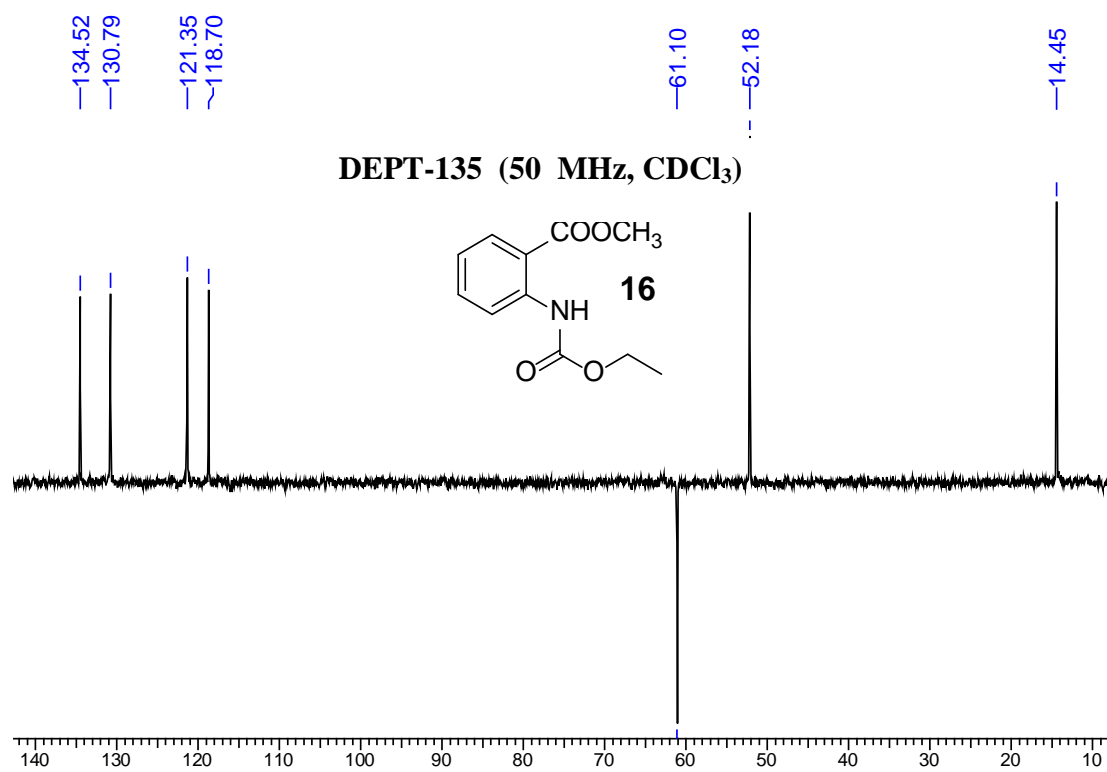

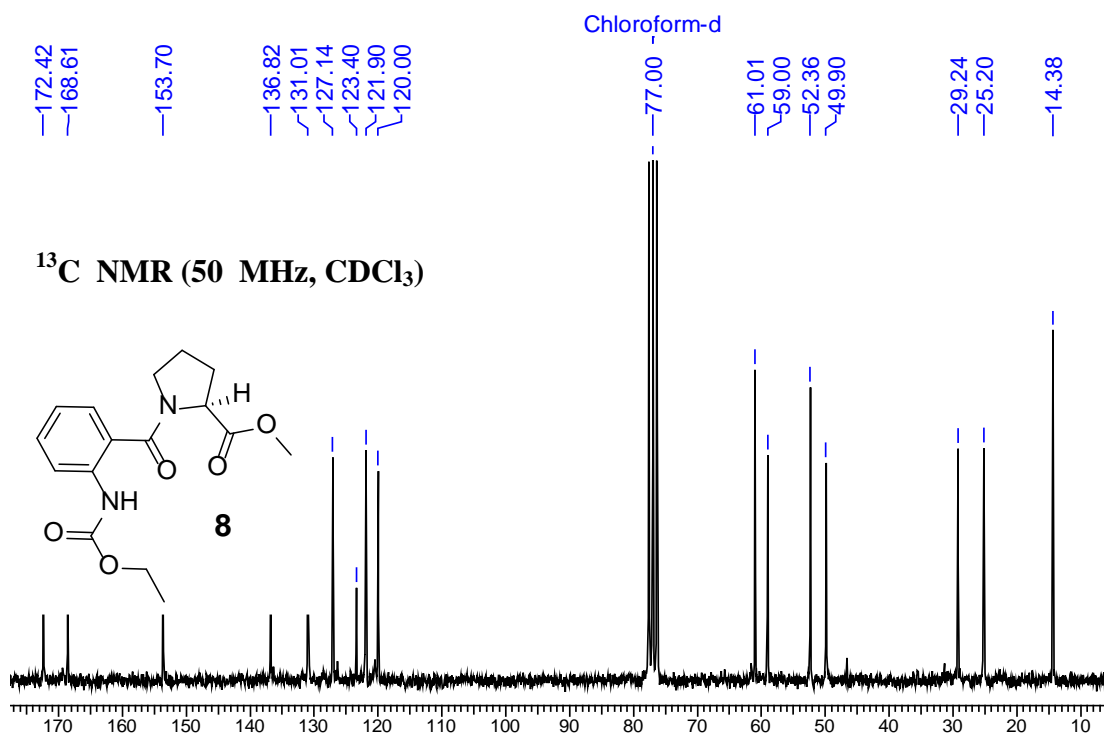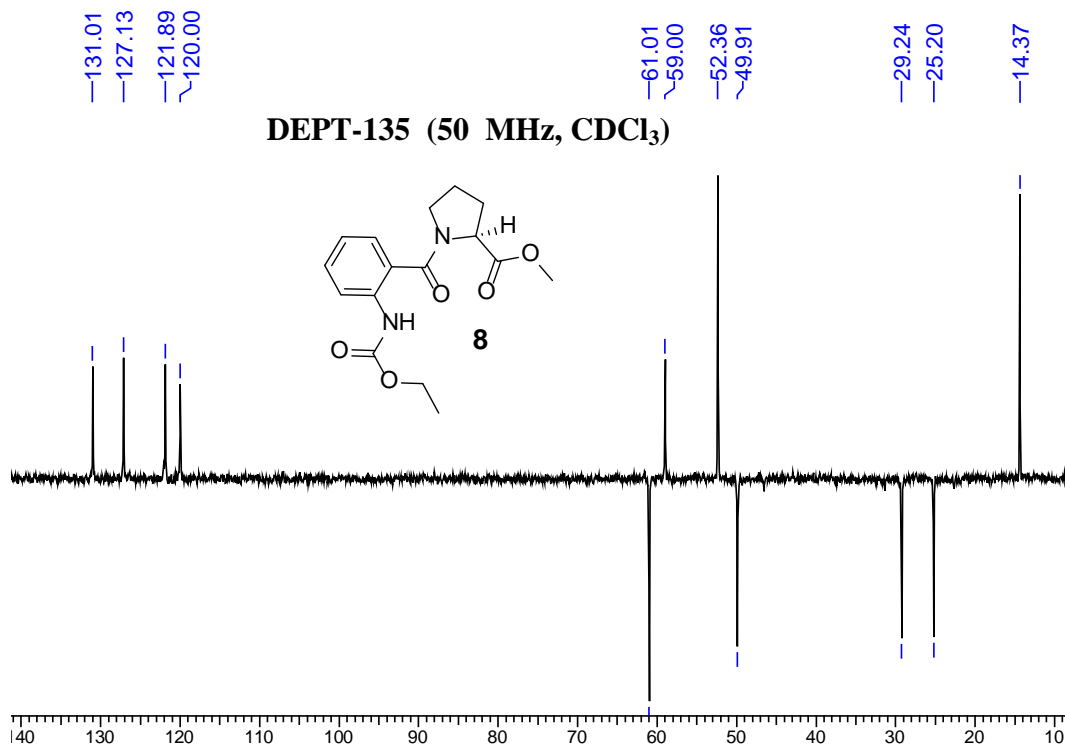

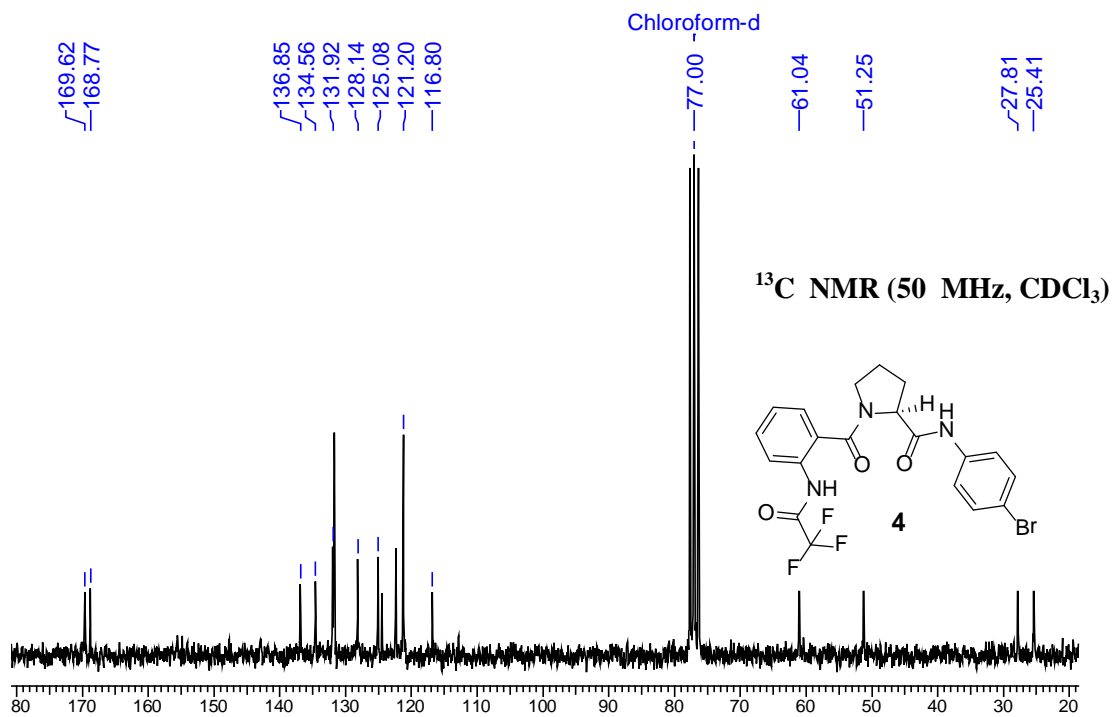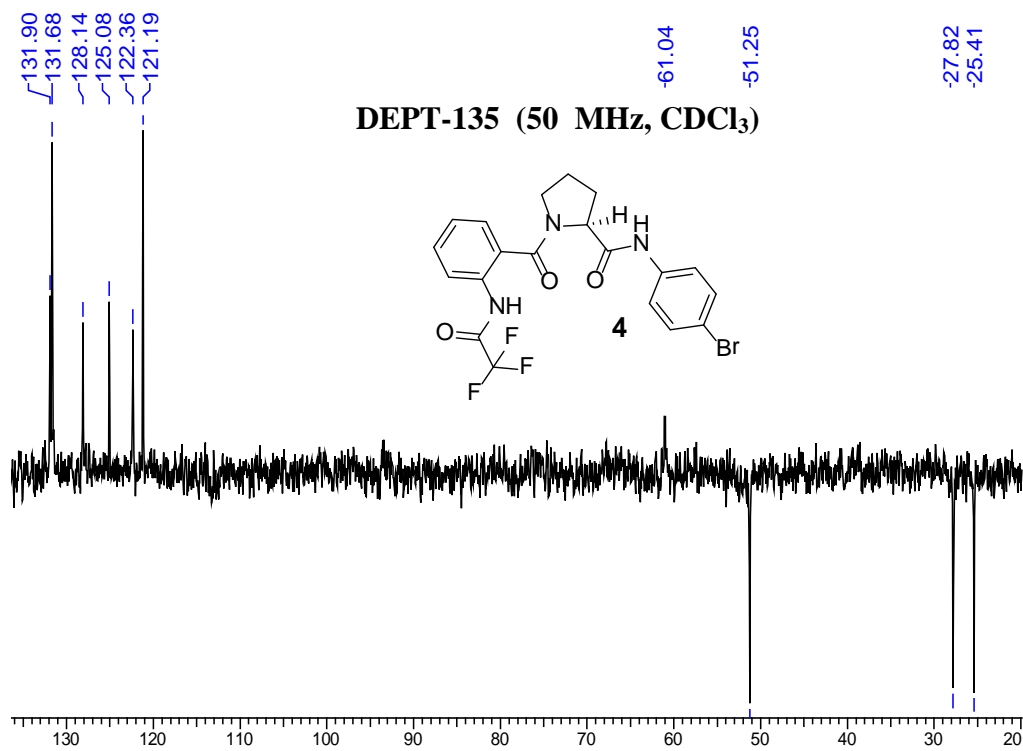

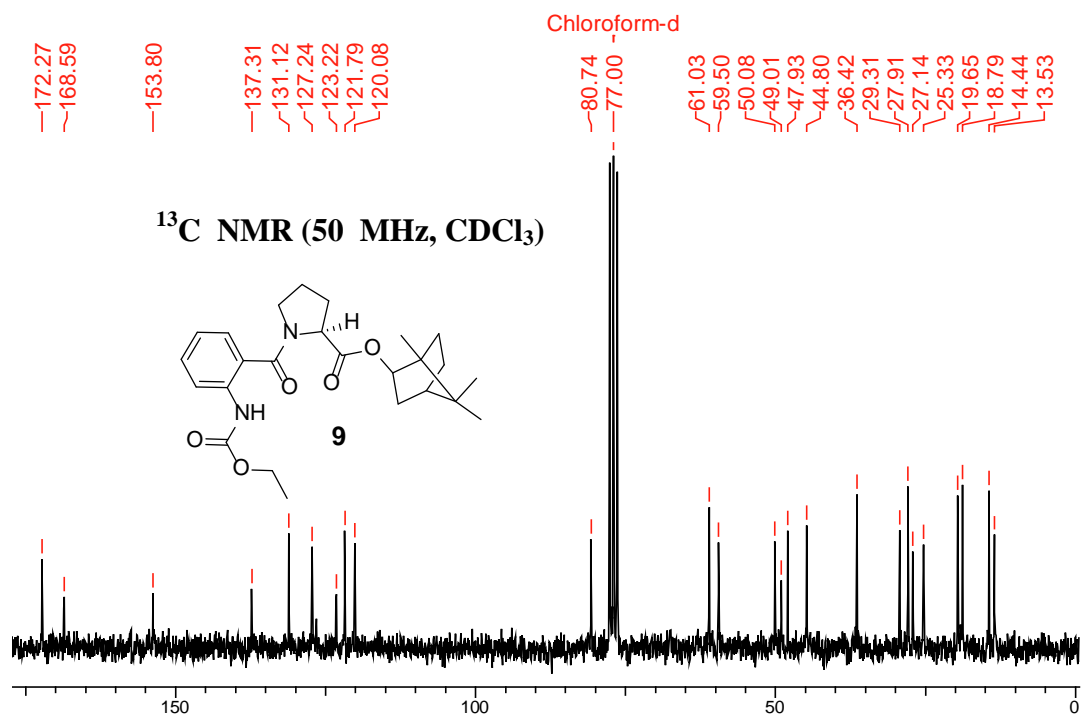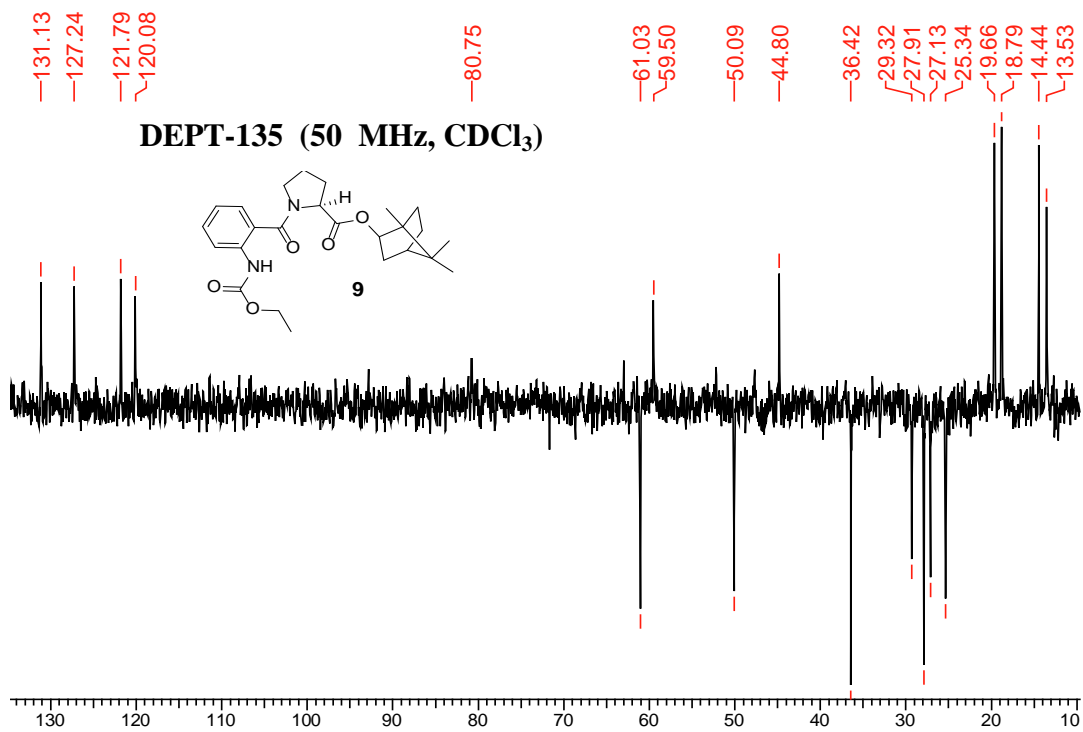

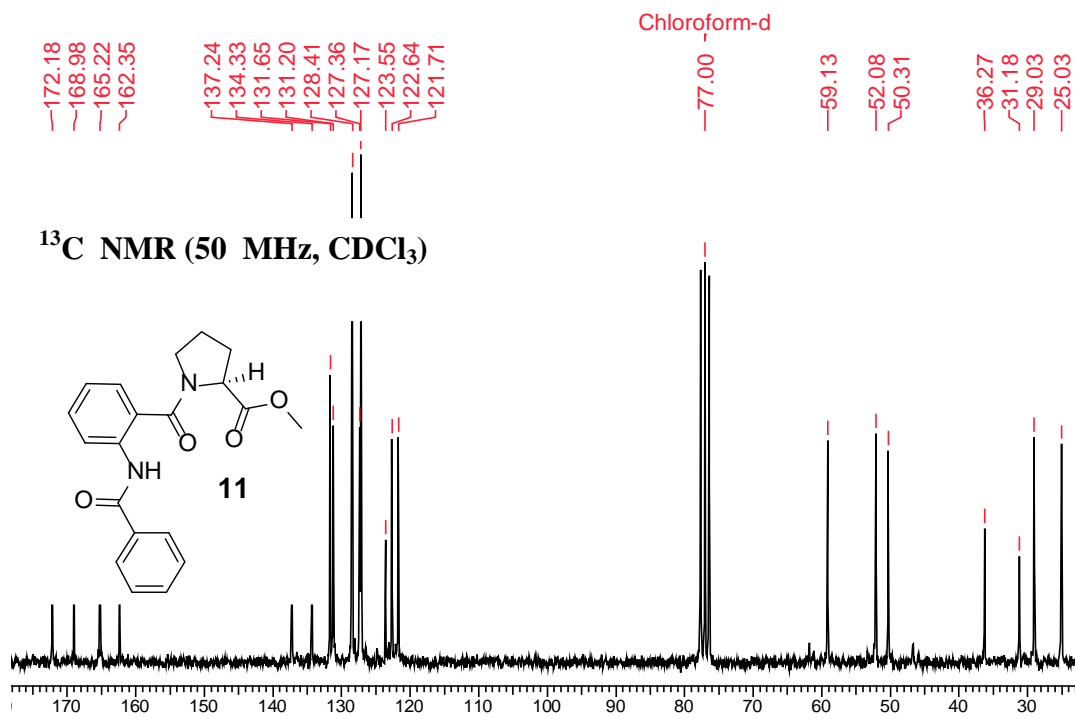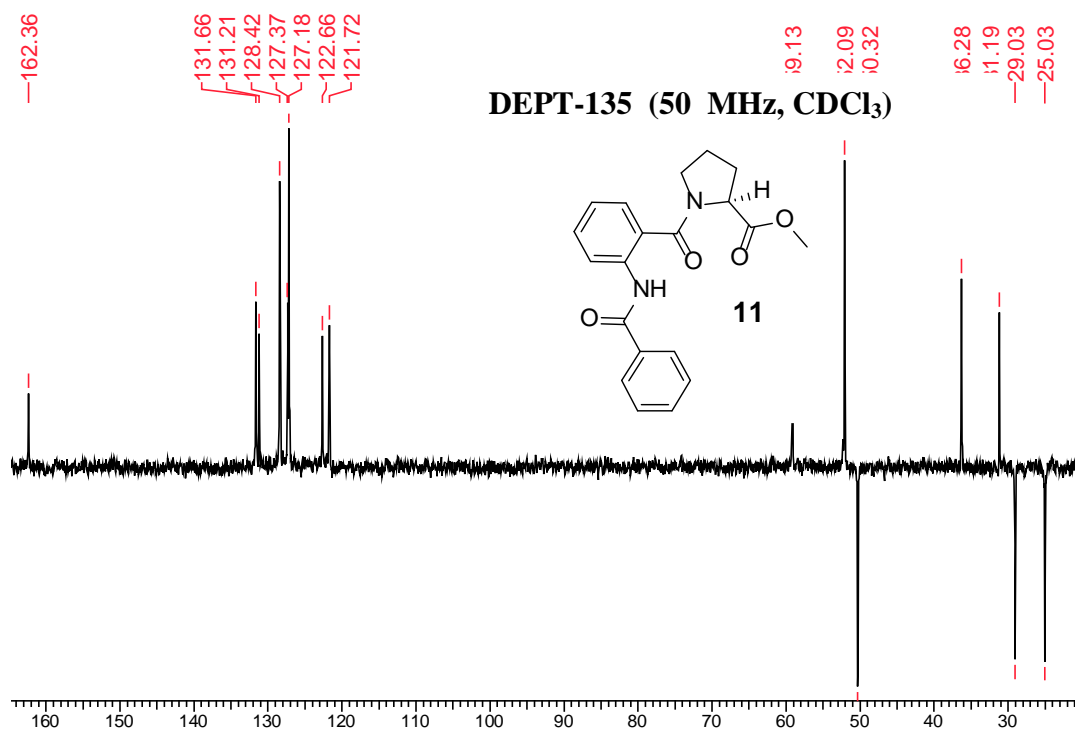

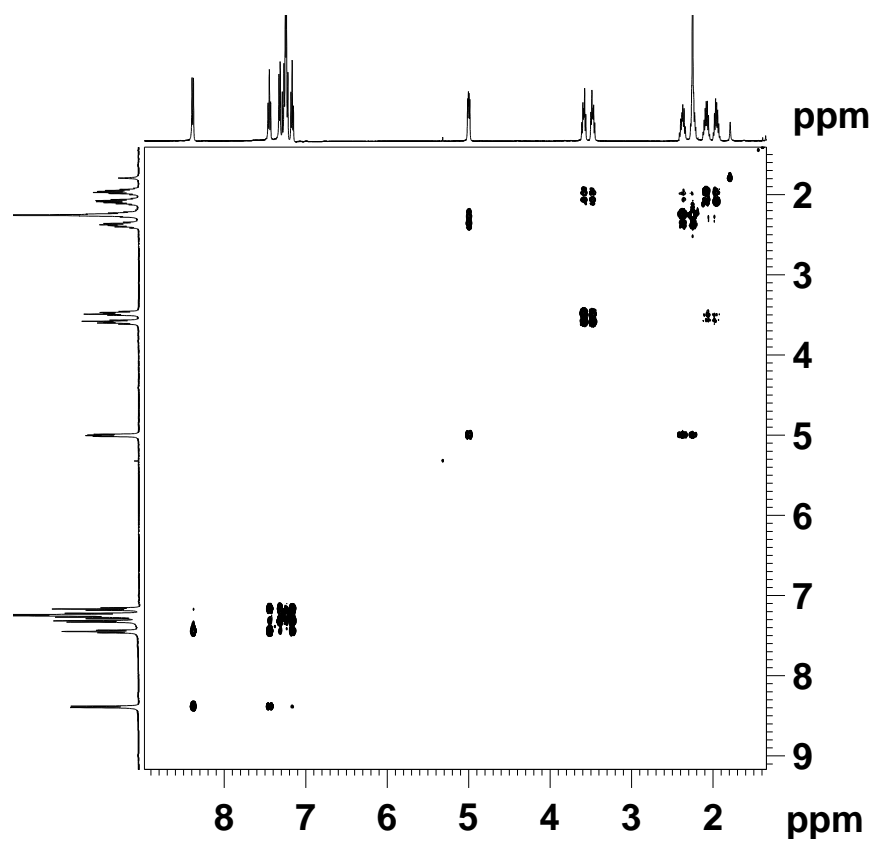

**Figure 1:** COSY spectra of amide **1** (400MHz, CDCl<sub>3</sub>)

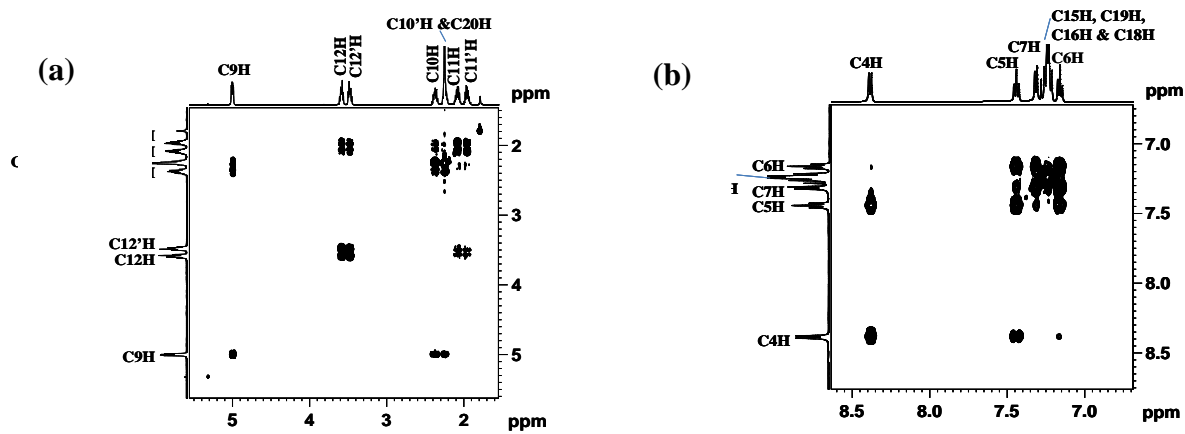

**Figure 2:** Partial COSY spectra of amide **1** (400MHz, CDCl<sub>3</sub>): aromatic (a) and aliphatic regions (b).



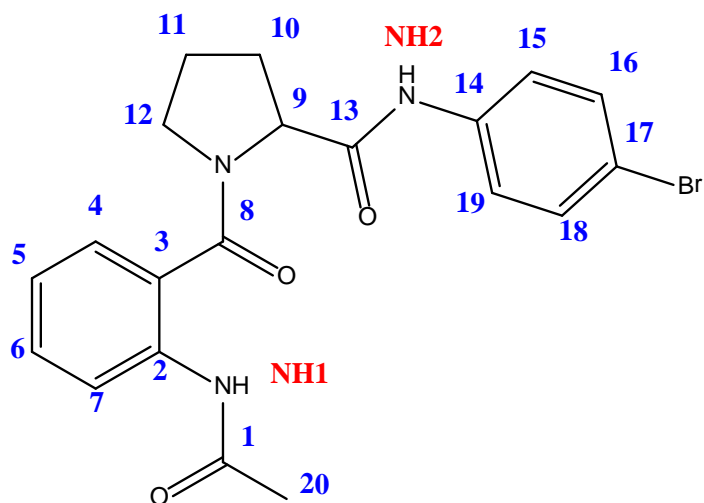

**Figure 3:** Molecular structure of Compound 1 (amide)

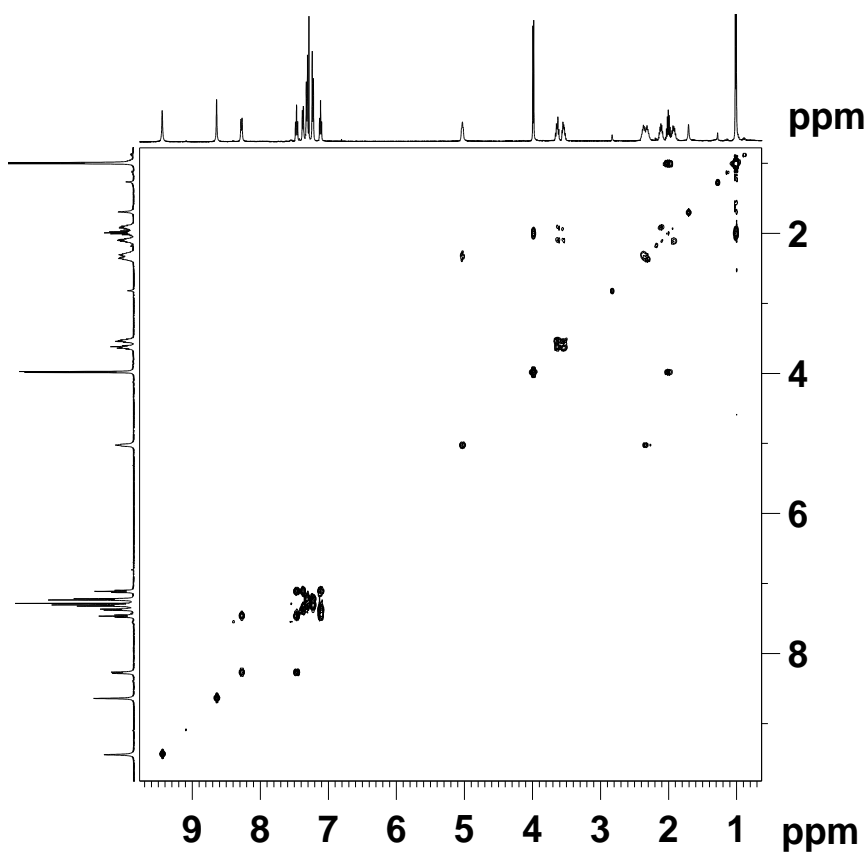

**Figure 4:** COSY spectra of amide 5 (400MHz, CDCl<sub>3</sub>)

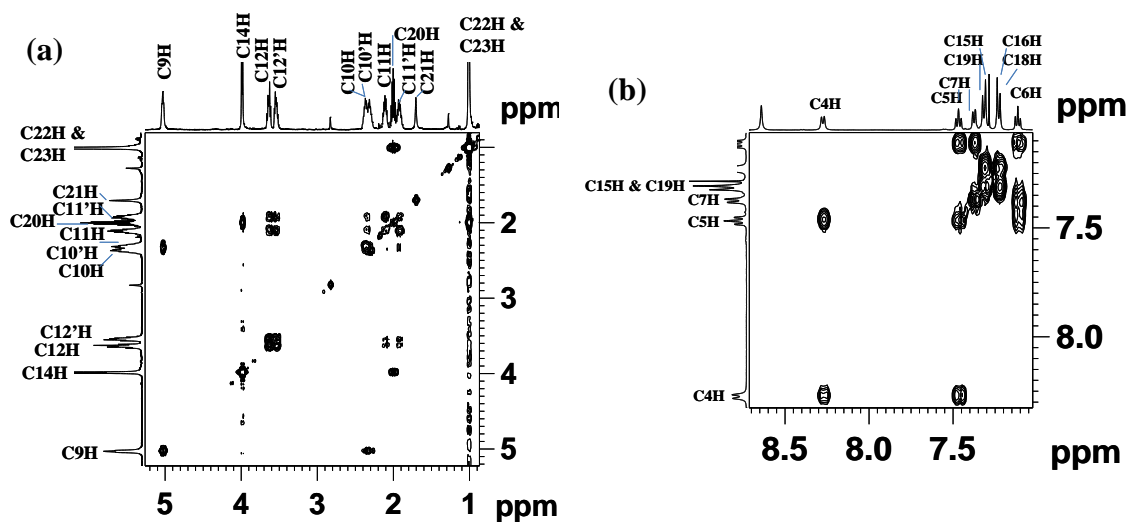

**Figure 5:** Partial COSY spectra of amide **5** (400MHz, C<sub>6</sub>D<sub>6</sub>): aromatic (a) and aliphatic regions (b).

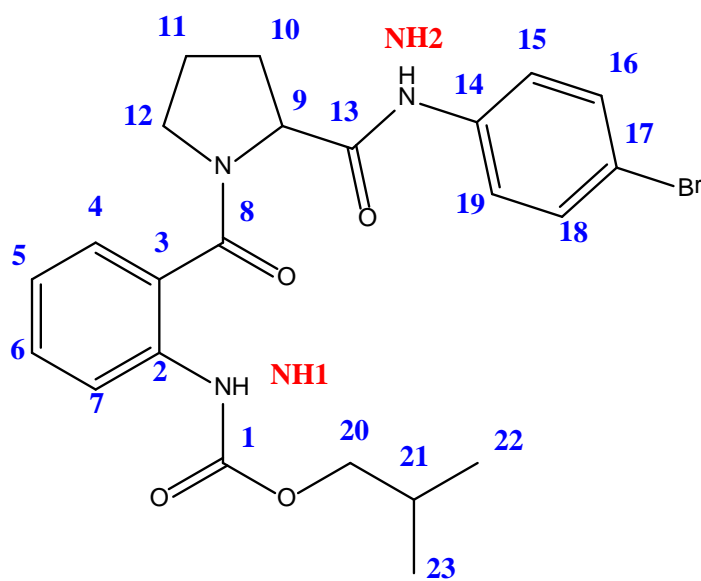

**Figure 6:** Molecular structure of Compound **5** (amide)

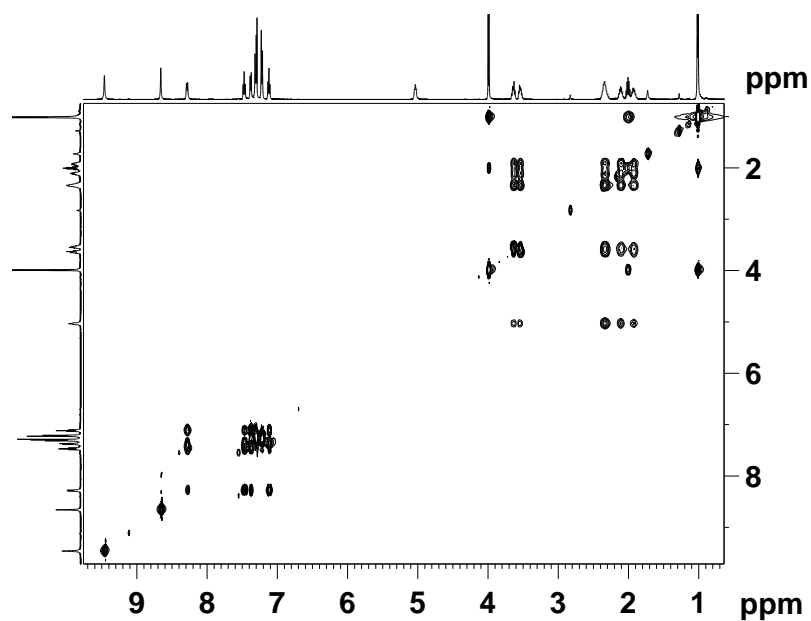

**Figure 7:** TOCSY spectra of amide 5 (400MHz, CDCl<sub>3</sub>)

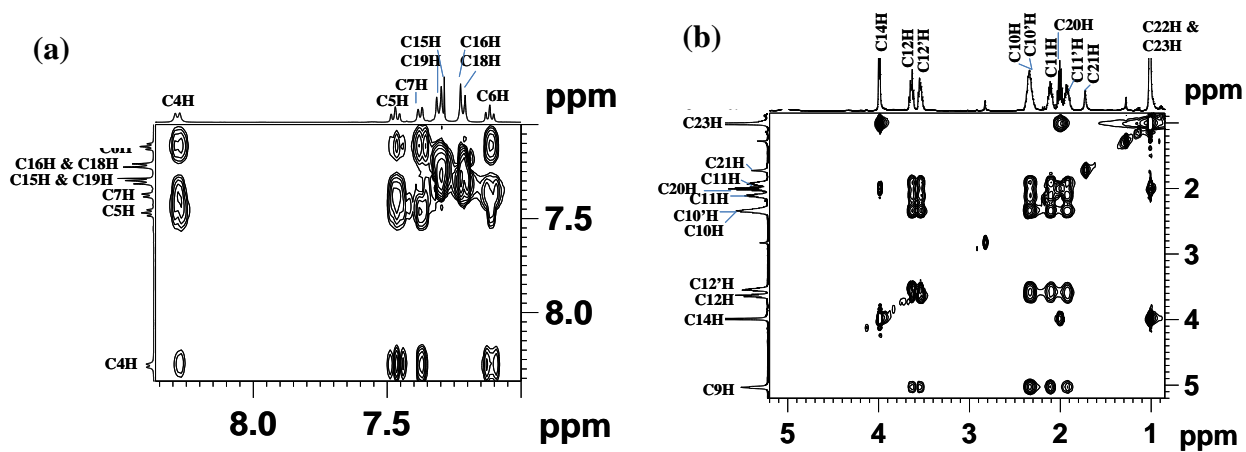

**Figure 8:** Partial TOCSY spectra of amide 5 (400MHz, CDCl<sub>3</sub>): aromatic (a) and aliphatic regions (b).

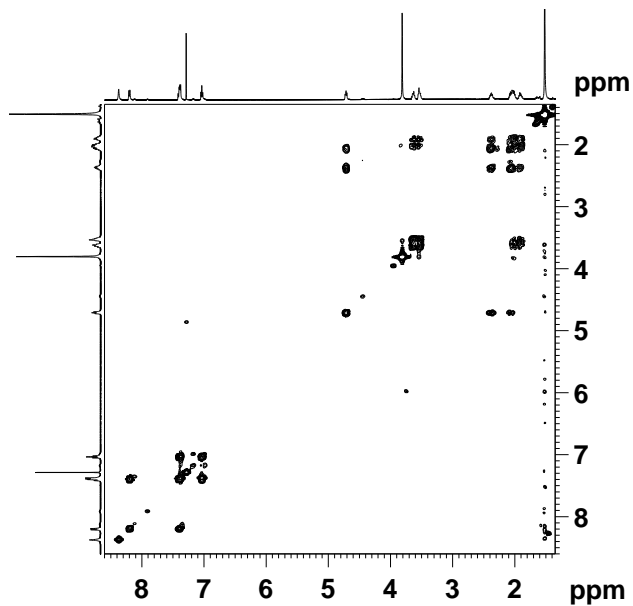

**Figure 9:** COSY spectra of ester **6** (400MHz, CDCl<sub>3</sub>)

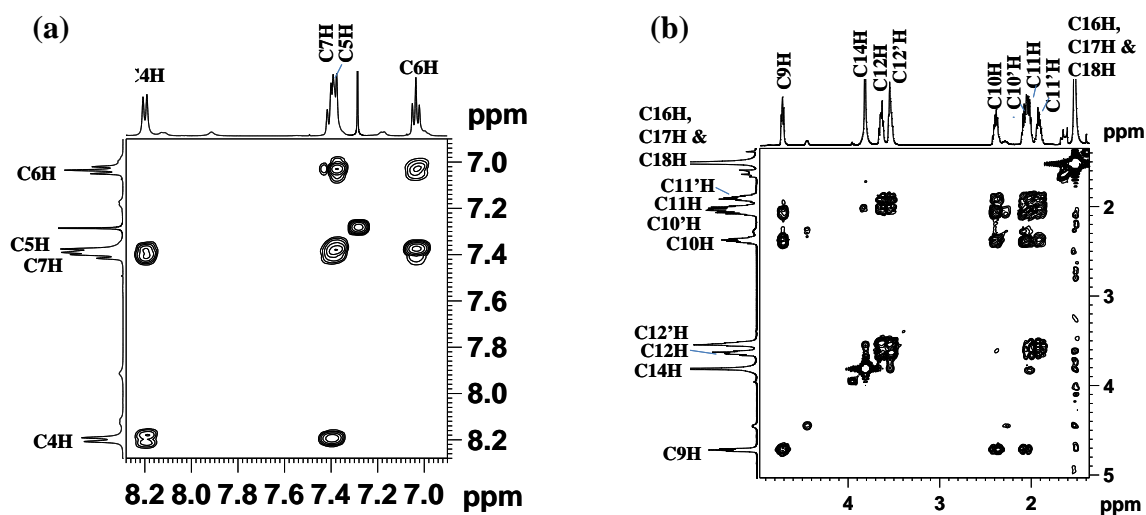

**Figure 10:** Partial COSY spectra of ester **6** (400MHz, CDCl<sub>3</sub>): aromatic (a) and aliphatic regions (b).

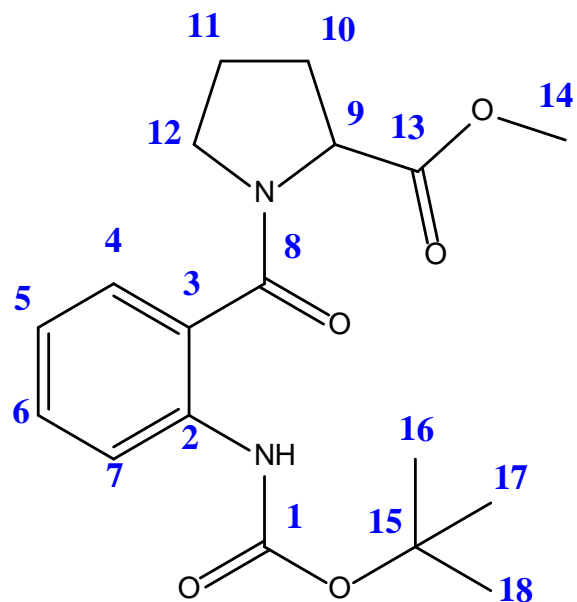

**Figure 11:** Molecular structure of Compound 6 (ester)

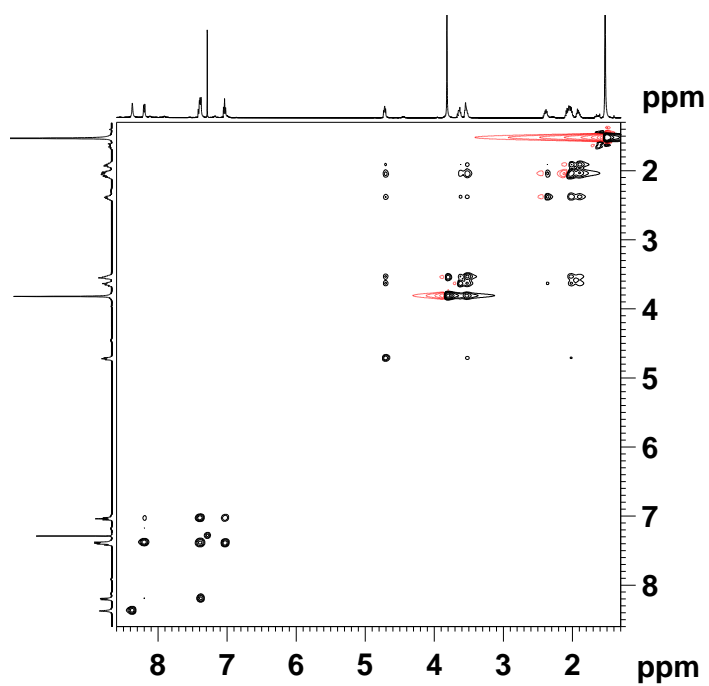

**Figure 12:** TOCSY spectra of ester 6 (400MHz, CDCl<sub>3</sub>)

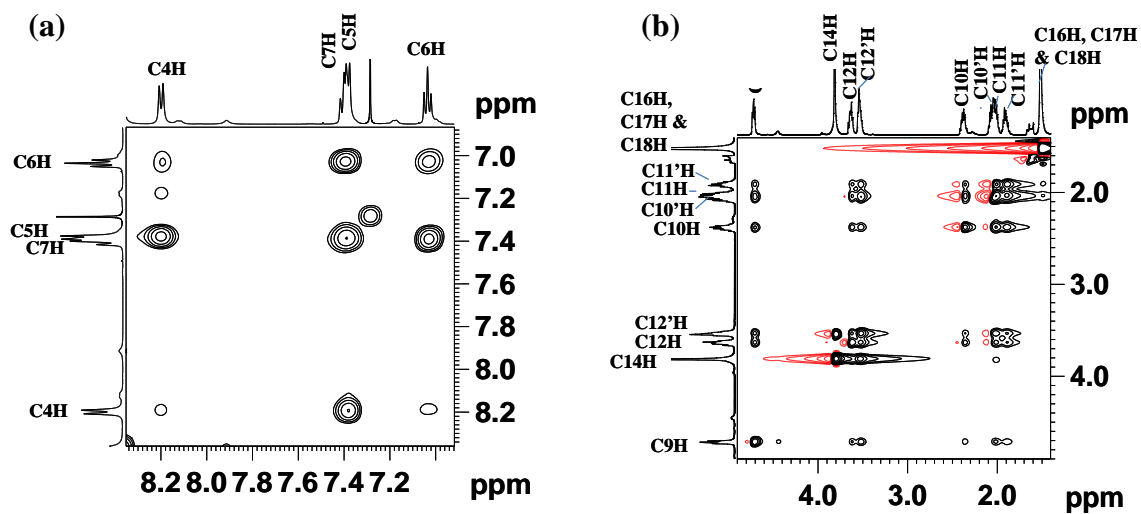

**Figure 13:** Partial TOCSY spectra of ester **6** (400MHz, CDCl<sub>3</sub>): aromatic (a) and aliphatic regions (b).

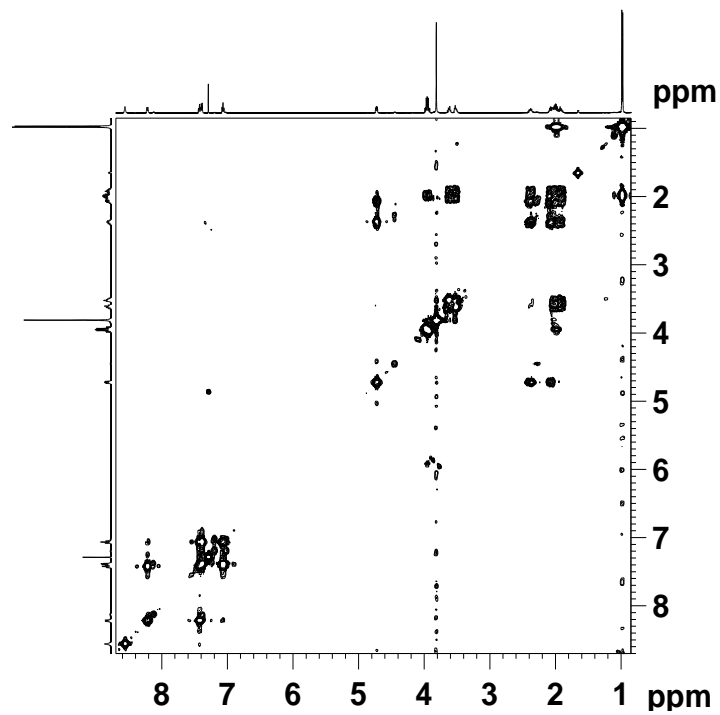

**Figure 14:** COSY spectra of ester **10** (400MHz, CDCl<sub>3</sub>):

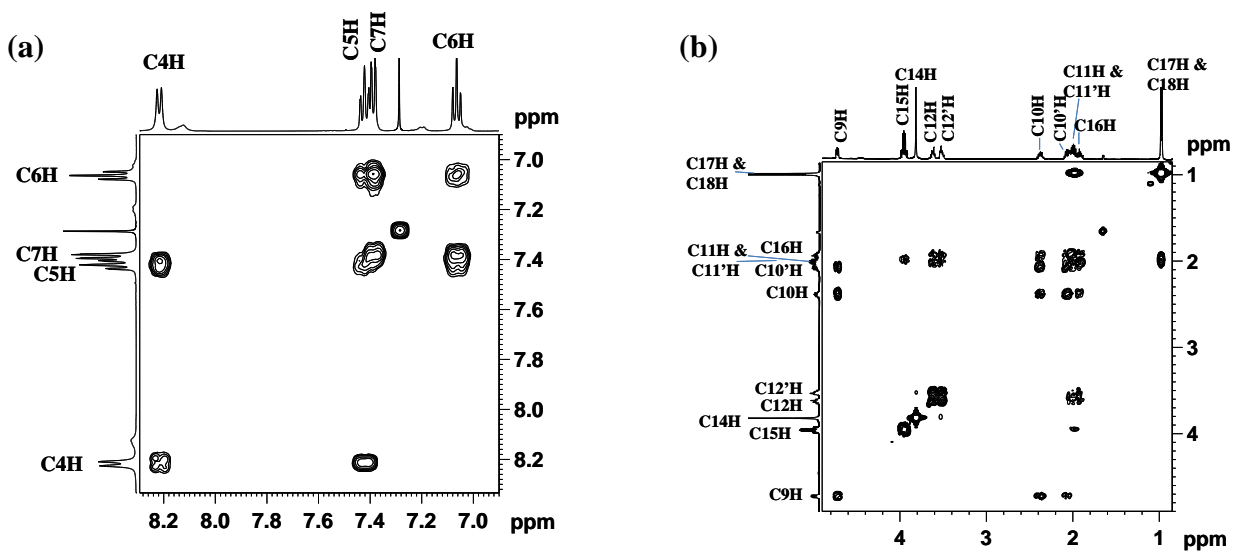

**Figure 15:** Partial COSY spectra of ester **10** (400MHz, CDCl<sub>3</sub>): aromatic (a) and aliphatic regions (b).

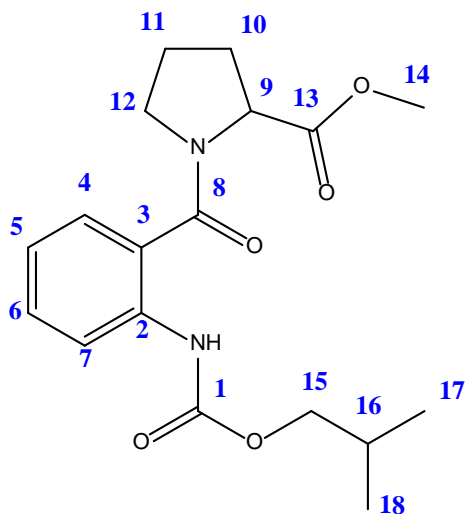

**Figure 16:** Molecular structure of Compound **10** (ester)

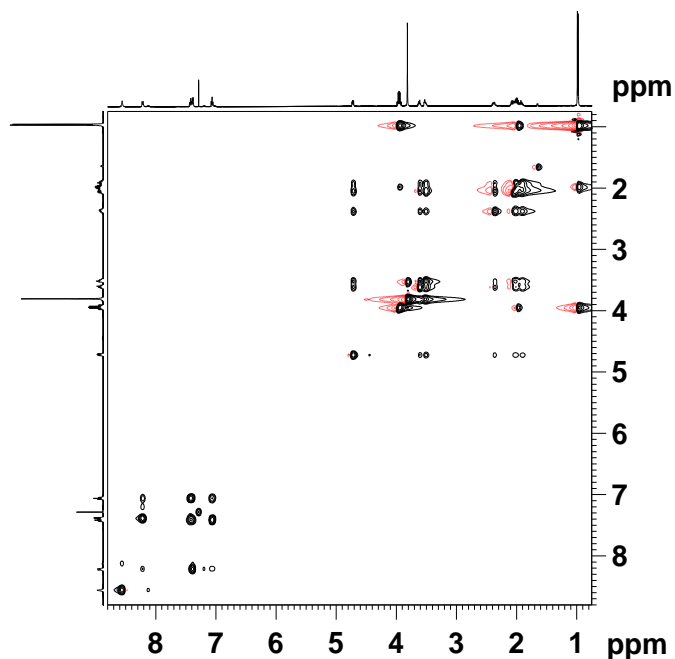

**Figure 17:** TOCSY spectra of ester **10** (400MHz, CDCl<sub>3</sub>):

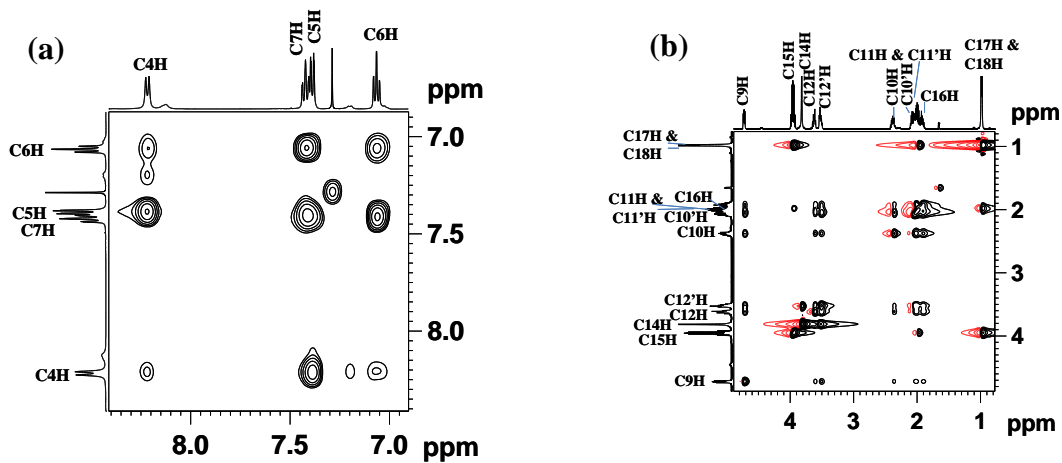

**Figure 18:** Partial TOCSY spectra of ester **10** (400MHz, CDCl<sub>3</sub>): aromatic (a) and aliphatic regions (b).



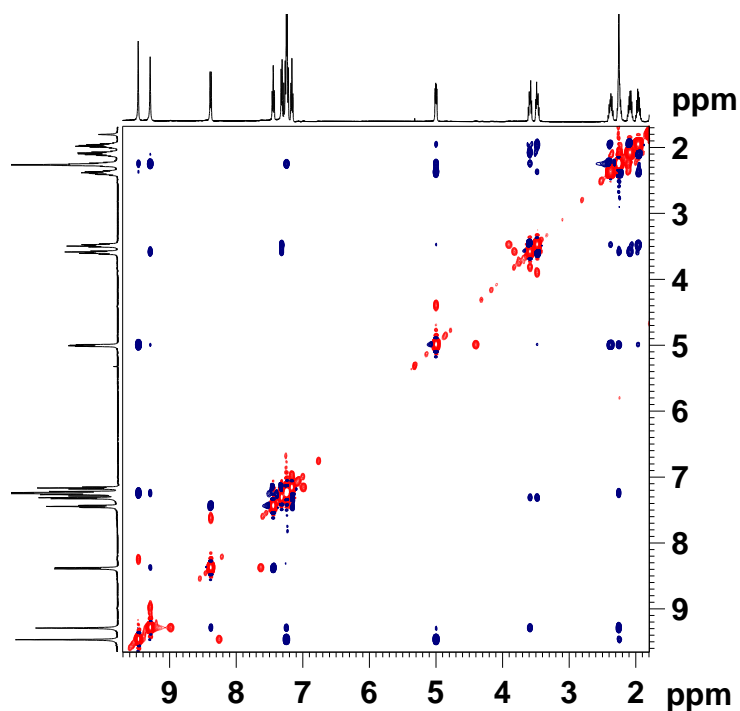

Figure 19: NOESY spectra of amide **1** (400MHz, CDCl<sub>3</sub>)

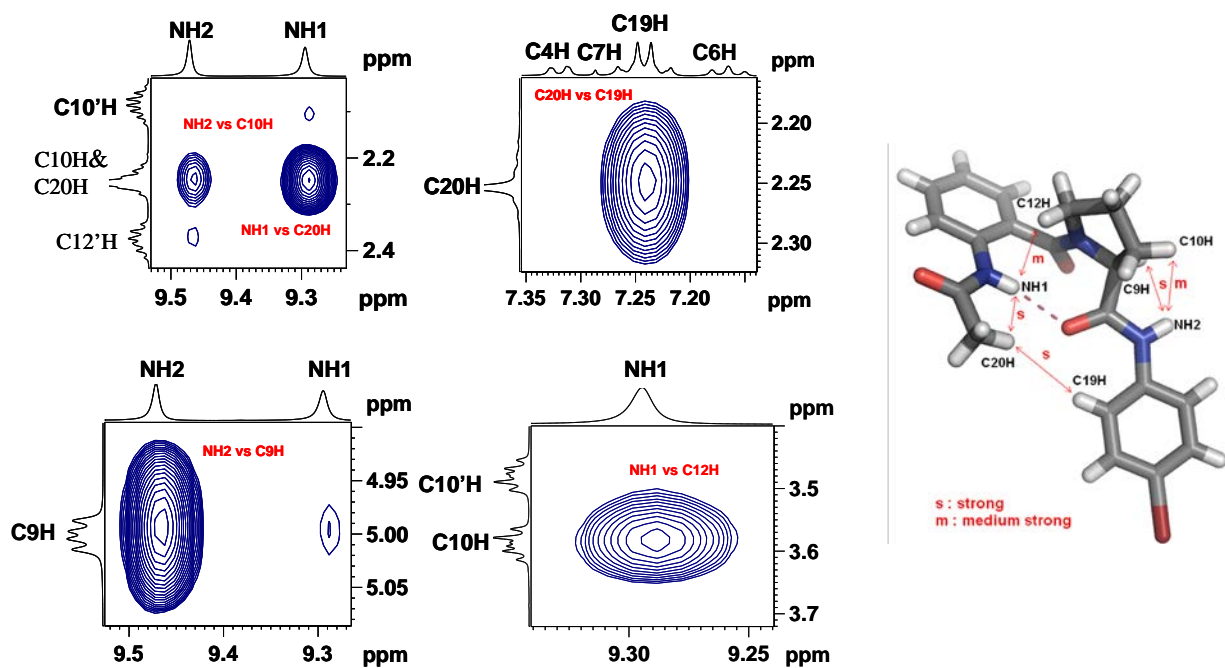

Figure 20: 2D NOESY extracts of amide **1** (400MHz, CDCl<sub>3</sub>)

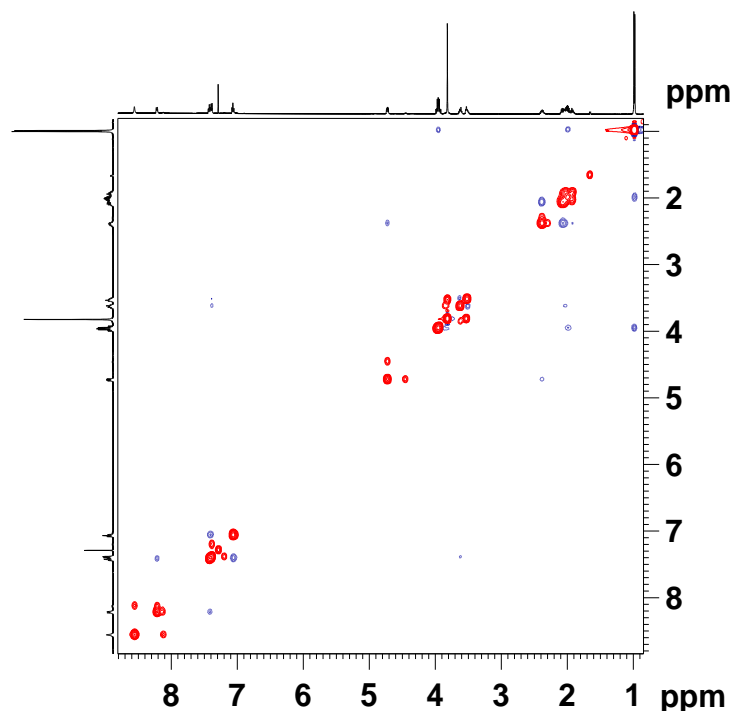

Figure 21: NOESY spectra of amide 5 (400MHz, CDCl<sub>3</sub>)

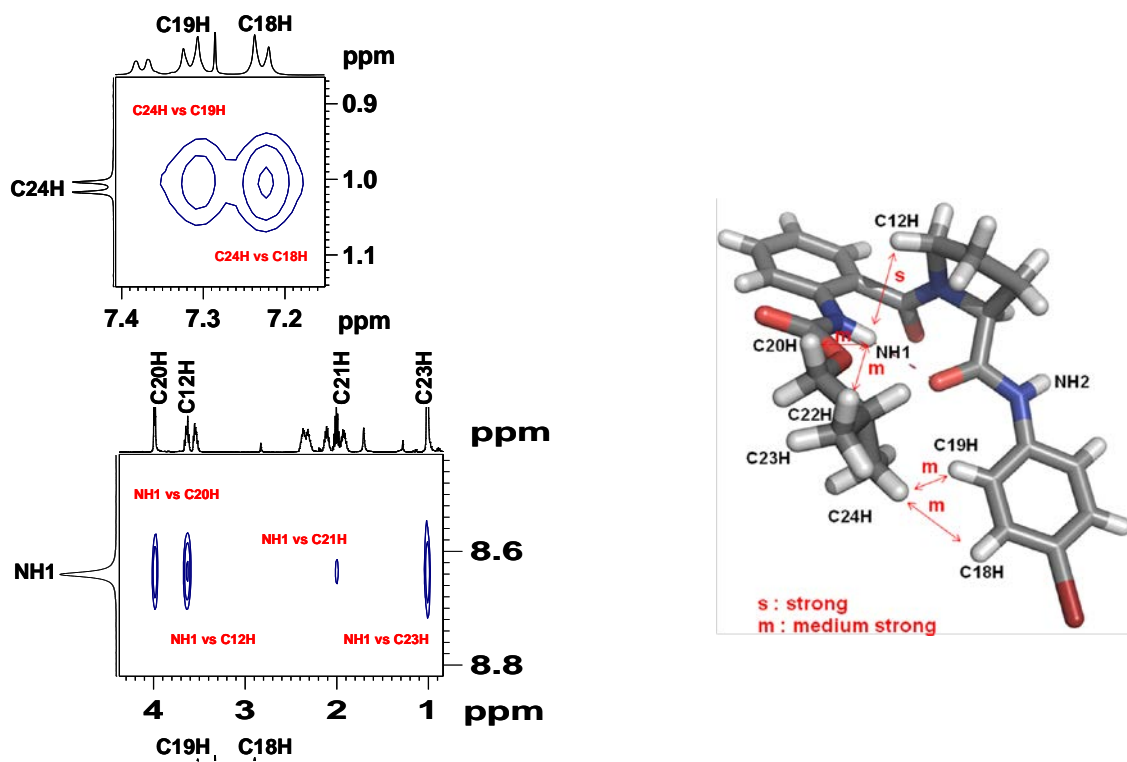

Figure 22: 2D NOESY extracts of amide 5 (400MHz, CDCl<sub>3</sub>)

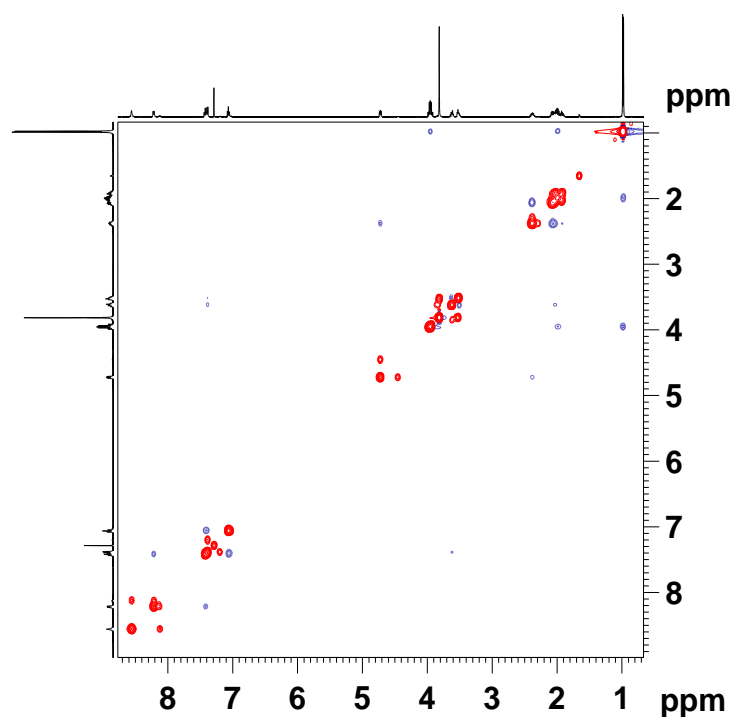

Figure 23: NOESY spectra of ester **10** (400MHz, CDCl<sub>3</sub>)

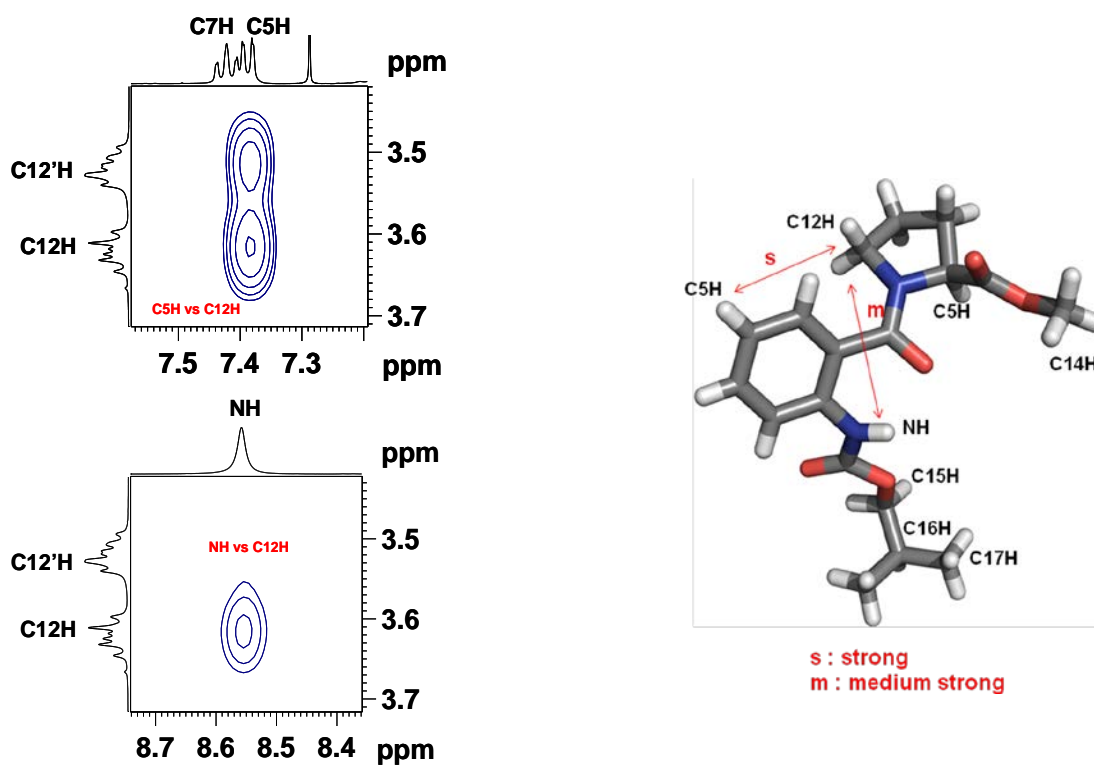

Figure 24: 2D NOESY extracts of ester **10** (400MHz, CDCl<sub>3</sub>)

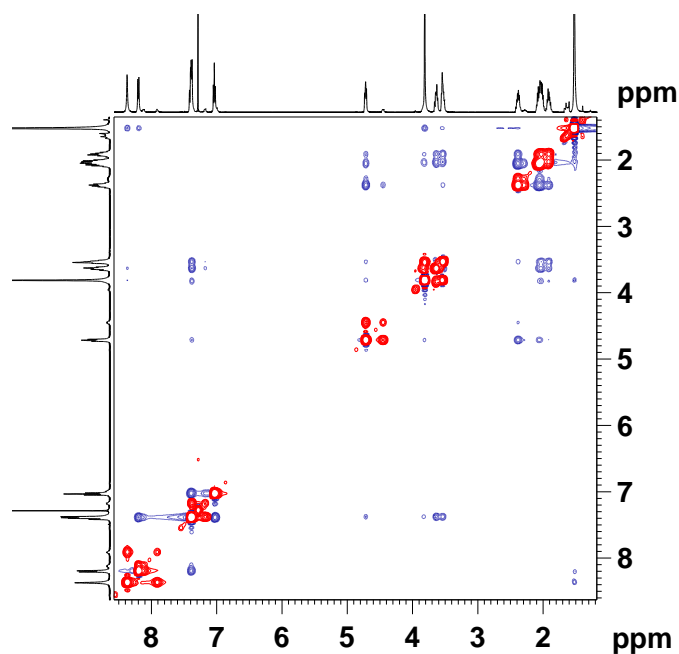

Figure 25: NOESY spectra of ester **6** (400MHz, CDCl<sub>3</sub>)

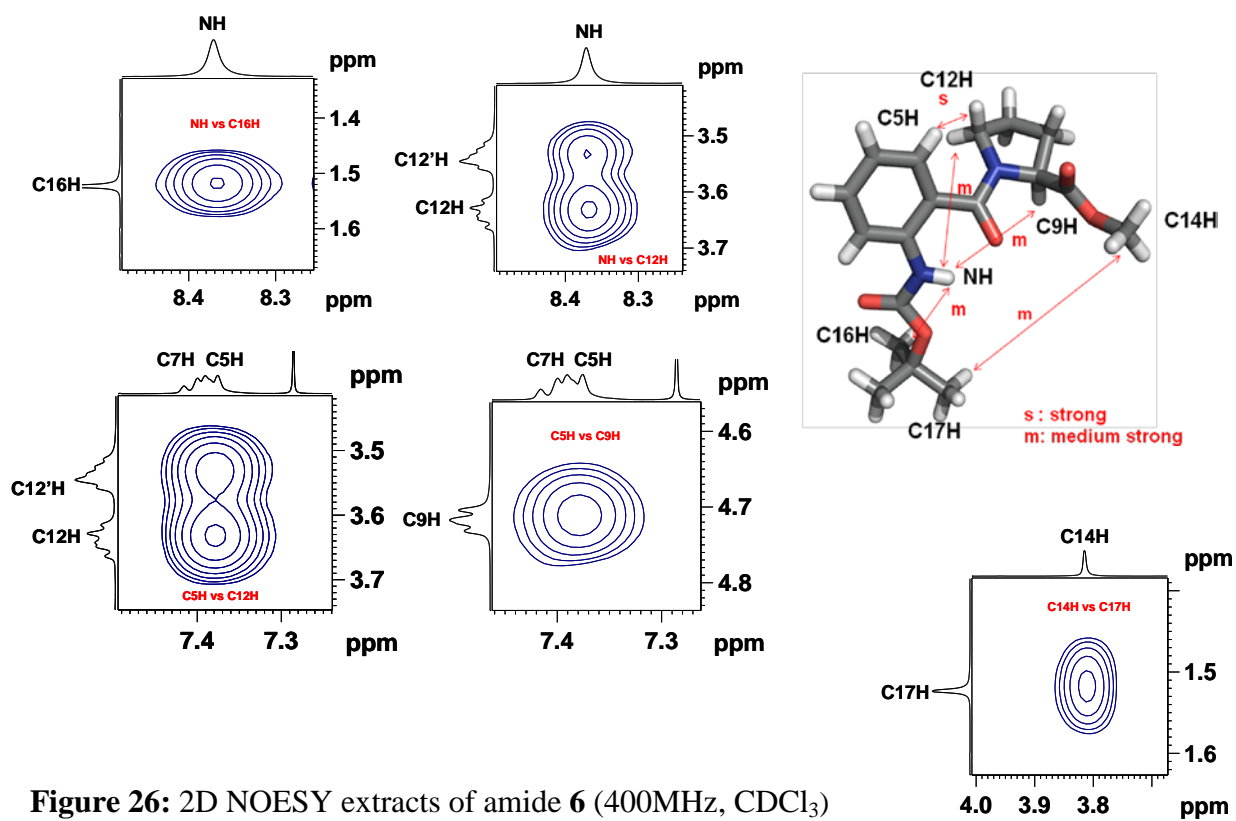

| No: | V <sub>DMSO-d6</sub><br>(in μ lit) | δ <sub>NH2</sub> | δ <sub>NH1</sub> |
|-----|------------------------------------|------------------|------------------|
| 1   | 0                                  | 9.15             | 9.15             |
| 2   | 5                                  | 9.36             | 9.18             |
| 3   | 10                                 | 9.48             | 9.2              |
| 4   | 15                                 | 9.57             | 9.21             |
| 5   | 20                                 | 9.63             | 9.21             |
| 6   | 25                                 | 9.67             | 9.22             |
| 7   | 30                                 | 9.71             | 9.21             |
| 8   | 35                                 | 9.73             | 9.21             |
| 9   | 40                                 | 9.75             | 9.2              |
| 10  | 45                                 | 9.77             | 9.19             |
| 11  | 50                                 | 9.77             | 9.18             |

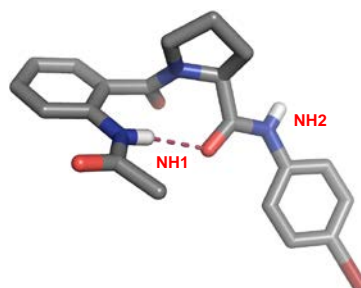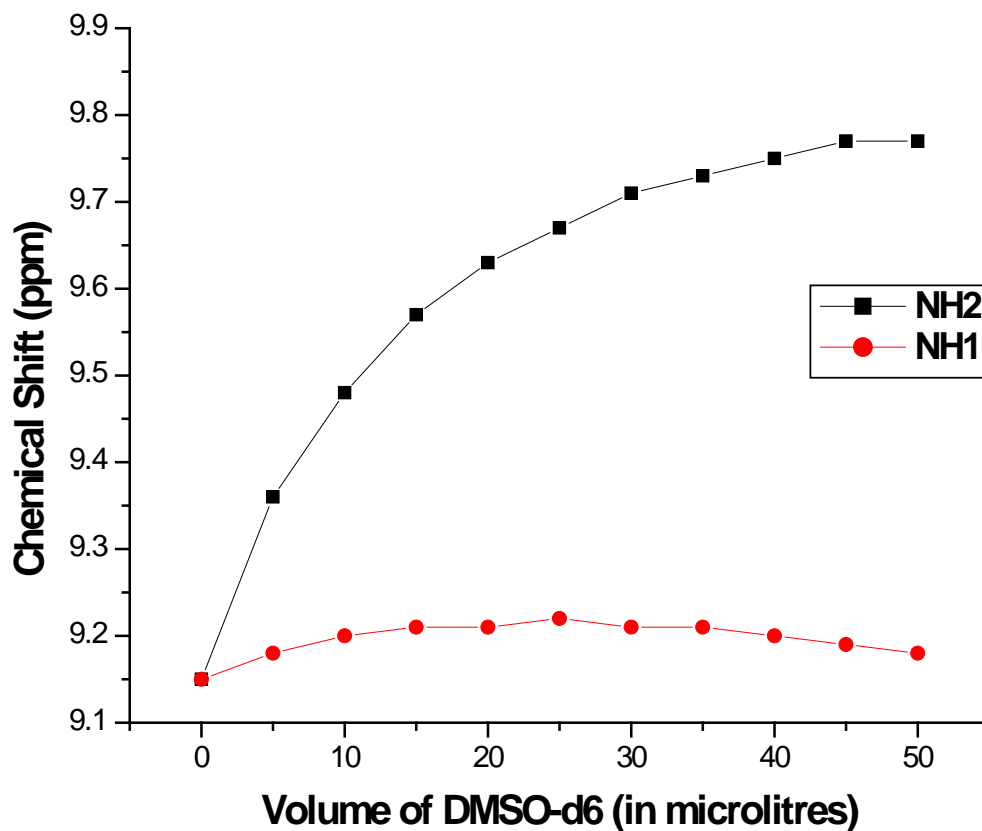

**Figure 27: Titration study of 1** in CDCl<sub>3</sub> (5 mmol) with DMSO-*d*<sub>6</sub>  
(Volume of DMSO-*d*<sub>6</sub> added at each addition = 5 μl)

| No: | V <sub>DMSO-d6</sub><br>(in $\mu$ lit) | $\delta_{\text{NH2}}$ | $\delta_{\text{NH1}}$ | Concentration<br>in mM |
|-----|----------------------------------------|-----------------------|-----------------------|------------------------|
| 1   | 0                                      | 9.19                  | 8.47                  | 2                      |
| 2   | 5                                      | 9.34                  | 8.55                  | 1.9802                 |
| 3   | 10                                     | 9.42                  | 8.59                  | 1.9608                 |
| 4   | 15                                     | 9.48                  | 8.62                  | 1.9418                 |
| 5   | 20                                     | 9.54                  | 8.64                  | 1.9231                 |
| 6   | 25                                     | 9.58                  | 8.66                  | 1.9048                 |
| 7   | 30                                     | 9.6                   | 8.66                  | 1.8868                 |
| 8   | 35                                     | 9.62                  | 8.66                  | 1.8692                 |
| 9   | 40                                     | 9.64                  | 8.66                  | 1.8519                 |
| 10  | 45                                     | 9.65                  | 8.65                  | 1.8349                 |
| 11  | 50                                     | 9.66                  | 8.65                  | 1.8182                 |

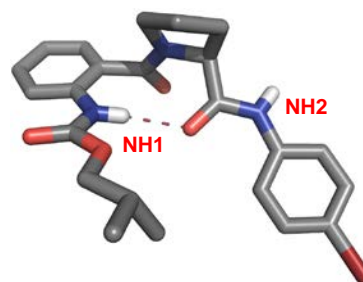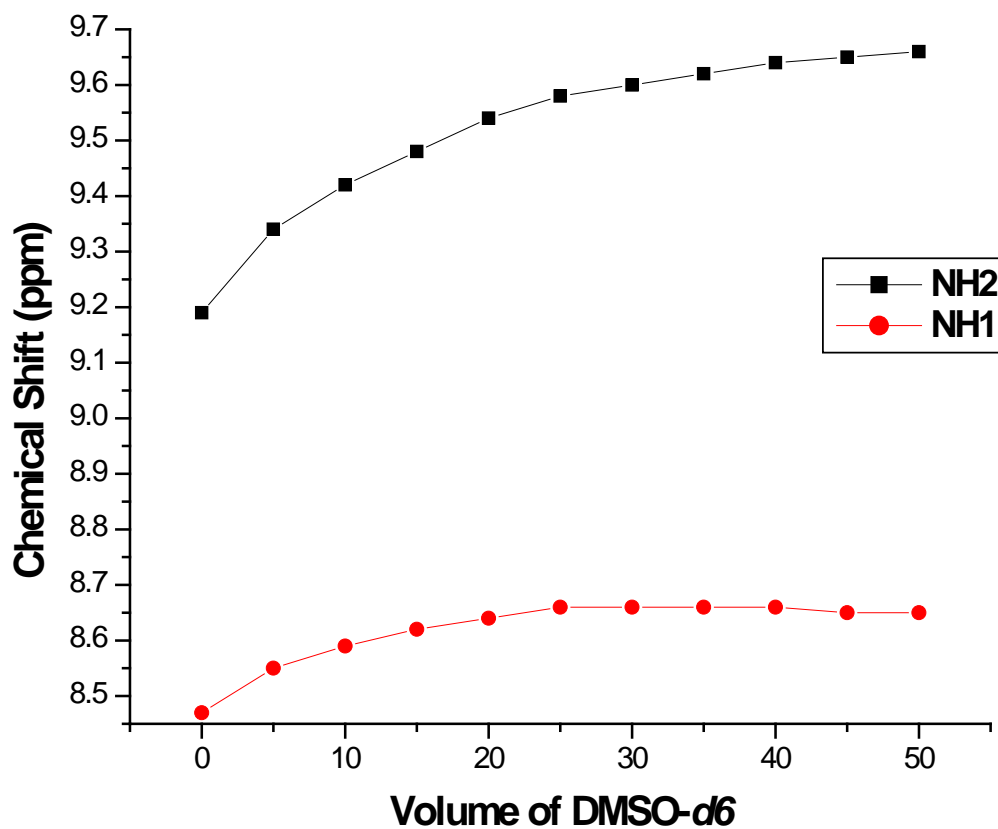

**Figure 28: Titration study of 5** in  $\text{CDCl}_3$  (2 mmol) with  $\text{DMSO-}d_6$   
(Volume of  $\text{DMSO-}d_6$  added at each addition = 5  $\mu$ l)

| No: | V <sub>DMSO-d6</sub><br>(in μ lit) | δ <sub>NH</sub> | Concentration<br>in mM |
|-----|------------------------------------|-----------------|------------------------|
| 1   | 0                                  | 8.55            | 2                      |
| 2   | 5                                  | 8.53            | 1.9802                 |
| 3   | 10                                 | 8.51            | 1.9608                 |
| 4   | 15                                 | 8.49            | 1.9418                 |
| 5   | 20                                 | 8.47            | 1.9231                 |
| 6   | 25                                 | 8.45            | 1.9048                 |
| 7   | 30                                 | 8.43            | 1.8868                 |
| 8   | 35                                 | 8.41            | 1.8692                 |
| 9   | 40                                 | 8.39            | 1.8519                 |
| 10  | 45                                 | 8.38            | 1.8349                 |
| 11  | 50                                 | 8.36            | 1.8182                 |

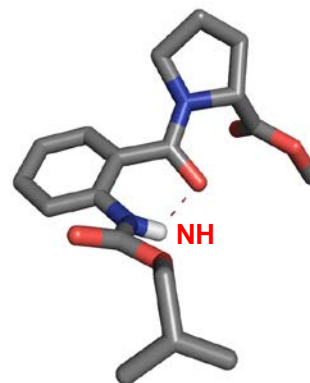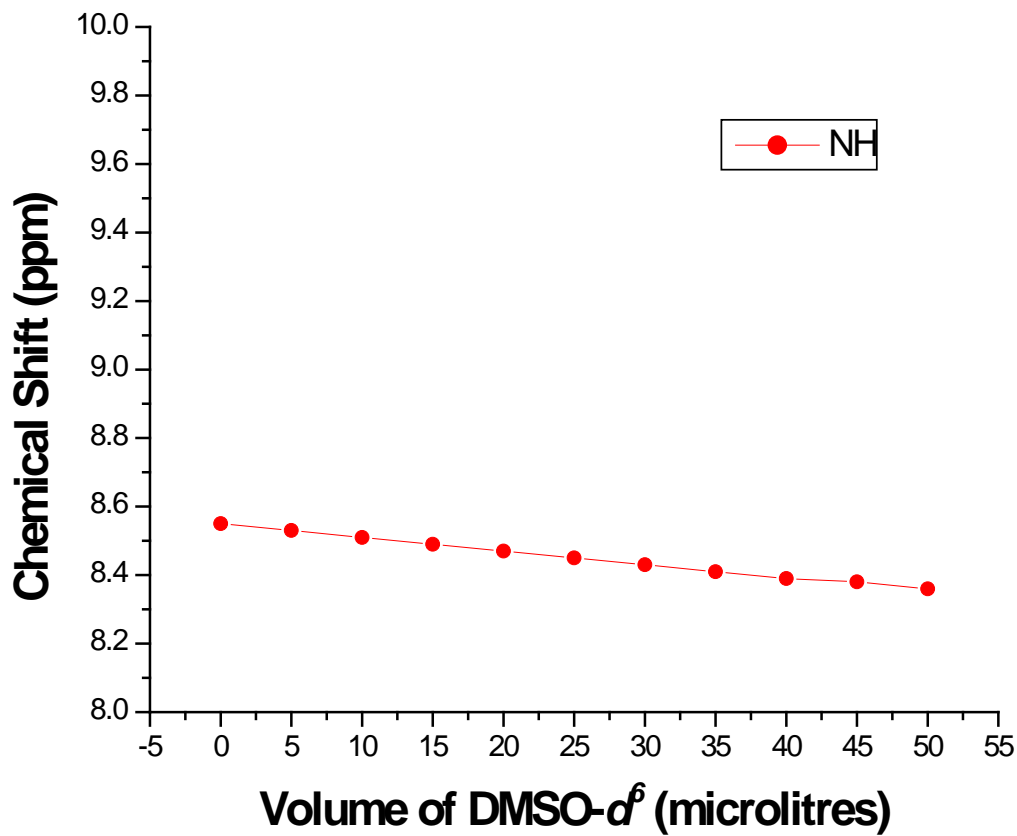

**Figure 29:** Titration study of **10** in CDCl<sub>3</sub> (2 mmol) with DMSO-*d*<sub>6</sub>  
(Volume of DMSO-*d*<sub>6</sub> added at each addition = 5 μl)

**Crystal Data Table 1: Hydrogen bonding Parameters**

| Compound No.  | Tortion angles (Deg.) |         |        |         | Hydrogen bonding Parameters |       |               |        |
|---------------|-----------------------|---------|--------|---------|-----------------------------|-------|---------------|--------|
|               | Ant                   |         | Pro    |         | Distances (Å)               |       | Angles (Deg.) |        |
|               | $\phi$                | $\psi$  | $\phi$ | $\psi$  | O...H                       | N...O | C=O...N       | NH...O |
| <b>Amides</b> |                       |         |        |         |                             |       |               |        |
| 1             | 173.40                | -65.37  | -55.97 | 164.59  | 2.173                       | 3.025 | 127.28        | 170.80 |
| 2             | 170.23                | -69.58  | -60.64 | 174.04  | 2.030                       | 2.881 | 131.10        | 169.81 |
| 3             | -172.38               | -70.08  | -58.82 | 164.32  | 2.259                       | 3.075 | 123.31        | 158.34 |
| 4             | 176.23                | -72.66  | -55.94 | 166.62  | 2.108                       | 2.960 | 132.15        | 171.33 |
| 5             | 166.51                | -71.89  | -56.49 | 162.41  | 2.178                       | 3.033 | 127.17        | 172.17 |
| <b>Esters</b> |                       |         |        |         |                             |       |               |        |
| 6             | 153.97                | 150.75  | -61.60 | -139.47 | 5.263                       | 5.842 | 65.58         | 128.93 |
| 7             | -177.80               | 140.07  | -69.70 | 153.71  | 5.452                       | 5.930 | 72.70         | 120.03 |
| 8             | -144.62               | 146.41  | -57.70 | 135.55  | 5.237                       | 5.790 | 64.08         | 125.28 |
| 9             | 167.51                | -144.35 | -56.68 | -38.27  | 4.737                       | 5.552 | 48.65         | 156.00 |
| 10            | -138.63               | 146.28  | -59.04 | 134.8   | 5.366                       | 5.874 | 62.70         | 122.65 |
| 11            | -177.28               | -130.50 | -59.62 | 156.72  | 3.177                       | 4.510 | 111.12        | 148.44 |

**Crystal Data Table 2: Potential Hydrogen bonding parameters**

=====  
 Analysis of Potential Hydrogen Bonds for Compound 1  
 =====

| Donor --- H....Acceptor                   | D - H | H...A | D...A | D - H...A |
|-------------------------------------------|-------|-------|-------|-----------|
| 1 C(12A) --H(12A) ..O(1) <sup>Inter</sup> | 0.97  | 2.649 | 3.452 | 140       |
| 2 C(11A) --H(11A) ..N(1) <sup>Inter</sup> | 0.97  | 2.705 | 3.453 | 134       |
| 3 N(3) --H(3) ..O(2) <sup>Inter</sup>     | 0.86  | 2.038 | 2.877 | 165       |
| 4 N(1) --H(1) ..O(3) <sup>Intra</sup>     | 0.86  | 2.173 | 3.025 | 170       |

=====  
 Analysis of Potential Hydrogen Bonds for Compound 2  
 =====

| Donor --- H....Acceptor                  | D - H | H...A | D...A | D - H...A |
|------------------------------------------|-------|-------|-------|-----------|
| 1 C(23) --H(23B) ..N(1) <sup>Inter</sup> | 0.96  | 2.72  | 3.556 | 145       |
| 2 C(5) --H(5A) ..O(3) <sup>Inter</sup>   | 0.97  | 2.37  | 3.169 | 138       |
| 3 N(4) --H(4) ..O(3) <sup>Inter</sup>    | 0.86  | 2.06  | 2.859 | 154       |
| 4 N(2) --H(2) ..O(5) <sup>Intra</sup>    | 0.93  | 2.03  | 2.881 | 170       |

=====  
 Analysis of Potential Hydrogen Bonds for Compound 3  
 =====

| Donor --- H....Acceptor                  | D - H | H...A | D...A | D - H...A |
|------------------------------------------|-------|-------|-------|-----------|
| 1 C(21) --H(21B) ..O(1) <sup>intra</sup> | 0.96  | 2.65  | 3.606 | 173       |
| 2 N(1) --H(1) ..O(4) <sup>Intra</sup>    | 0.86  | 2.26  | 3.075 | 158       |
| 3 C(9) --H(9) ..O(3) <sup>inter</sup>    | 0.98  | 2.63  | 3.178 | 115       |
| 4 N(3) --H(3) ..O(3) <sup>Intra</sup>    | 0.86  | 2.08  | 2.911 | 161       |

=====



#### Analysis of Potential Hydrogen Bonds for Compound 4

| Donor --- H...Acceptor                            | D - H | H...A | D...A | D - H...A |
|---------------------------------------------------|-------|-------|-------|-----------|
| 1 C(20) --F(3) ..O(1) <sup>Halogen bonding</sup>  | 1.334 | 2.898 | 3.607 | 111       |
| 2 N(1) --H(1) ..O(3) <sup>intra</sup>             | 0.86  | 2.108 | 2.960 | 171       |
| 3 C(12) --H(12A) ..O(1) <sup>inter</sup>          | 0.97  | 2.529 | 3.447 | 158       |
| 4 N(3) --H(3) ..O(2) <sup>Inter</sup>             | 0.86  | 2.020 | 2.857 | 164       |
| 5 C(27) --Br(1) ..F(3) <sup>Halogen bonding</sup> | 1.895 | 3.020 | 4.867 | 163       |

#### Analysis of Potential Hydrogen Bonds for Compound 5

| Donor --- H...Acceptor                   | D - H | H...A | D...A | D - H...A |
|------------------------------------------|-------|-------|-------|-----------|
| 1 N(1) --H(1) ..O(3) <sup>Intra</sup>    | 0.86  | 2.17  | 3.033 | 172       |
| 2 C(9) --H(9) ..O(2) <sup>inter</sup>    | 0.98  | 2.63  | 3.193 | 116       |
| 3 C(12) --H(12B) ..O(1) <sup>inter</sup> | 0.97  | 2.32  | 3.140 | 141       |
| 4 N(3) --H(3) ..O(2) <sup>Inter</sup>    | 0.86  | 2.06  | 2.87  | 157       |

#### Analysis of Potential Hydrogen Bonds for Compound 6

| Donor --- H...Acceptor                   | D - H | H...A | D...A | D - H...A |
|------------------------------------------|-------|-------|-------|-----------|
| 1 C(6) --H(6) ..O(1) <sup>Inter</sup>    | 0.93  | 2.53  | 3.425 | 160       |
| 2 C(4) --H(4) ..O(3) <sup>Inter</sup>    | 0.93  | 2.71  | 3.551 | 150       |
| 3 C(11) --H(11A) ..O(5) <sup>inter</sup> | 0.97  | 2.71  | 3.623 | 158       |
| 4 C(12) --H(12B) ..O(2) <sup>inter</sup> | 0.97  | 2.29  | 3.351 | 136       |
| 5 C(14) --H(14A) ..O(3) <sup>Inter</sup> | 0.96  | 3.15  | 3.205 | 84        |
| 6 C(14) --H(14B) ..O(3) <sup>Inter</sup> | 0.96  | 2.84  | 3.205 | 103       |
| 7 C(14) --H(14C) ..O(3) <sup>Inter</sup> | 0.96  | 3.09  | 3.205 | 88        |
| 8 N(1) --H(1) ..O(3) <sup>Intra</sup>    | 0.86  | 2.02  | 2.685 | 133       |

#### Analysis of Potential Hydrogen Bonds for Compound 7

| Donor --- H...Acceptor                  | D - H | H...A | D...A | D - H...A |
|-----------------------------------------|-------|-------|-------|-----------|
| 1 C(5) --H(5) ..O(2)                    | 0.93  | 2.68  | 3.416 | 137       |
| 2 C(20) --H(20) ..O(3) <sup>Intra</sup> | 0.93  | 2.74  | 3.641 | 163       |
| 3 N(1) --H(1) ..O(3) <sup>Intra</sup>   | 0.86  | 2.17  | 2.806 | 131       |

#### Analysis of Potential Hydrogen Bonds for Compound 8

| Donor --- H...Acceptor                   | D - H | H...A | D...A | D - H...A |
|------------------------------------------|-------|-------|-------|-----------|
| 1 C(16) --H(16B) ..O(3) <sup>Inter</sup> | 0.98  | 2.63  | 3.577 | 163       |
| 2 C(6) --H(6) ..O(1) <sup>Inter</sup>    | 0.95  | 2.35  | 3.291 | 151       |

|                                          |      |      |       |     |
|------------------------------------------|------|------|-------|-----|
| 3 C(4) --H(4) ..O(3) <sup>Inter</sup>    | 0.95 | 2.46 | 3.322 | 174 |
| 4 C(11) --H(11A) ..O(5) <sup>Inter</sup> | 0.99 | 2.65 | 3.533 | 148 |
| 5 C(12) --H(12A) ..O(3) <sup>Inter</sup> | 0.99 | 2.65 | 3.623 | 165 |
| 6 C(12) --H(12B) ..O(2) <sup>Inter</sup> | 0.99 | 2.46 | 3.285 | 141 |
| 7 C(14) --H(14A) ..O(3) <sup>Inter</sup> | 0.98 | 3.16 | 3.152 | 81  |
| 8 C(14) --H(14B) ..O(3) <sup>Inter</sup> | 0.98 | 2.76 | 3.152 | 105 |
| 9 C(14) --H(14C) ..O(3) <sup>Inter</sup> | 0.98 | 3.02 | 3.152 | 105 |
| 10 N(1) --H(1) ..O(2) <sup>Intra</sup>   | 0.88 | 2.07 | 2.681 | 126 |

Analysis of Potential Hydrogen Bonds for Compound **9**

| Donor --- H....Acceptor                  | D - H | H...A | D...A | D - H...A |
|------------------------------------------|-------|-------|-------|-----------|
| 1 C(25) --H(25C) ..O(3) <sup>Inter</sup> | 0.98  | 2.51  | 3.346 | 143       |
| 2 C(4) --H(4) ..O(2) <sup>Inter</sup>    | 0.95  | 2.38  | 3.284 | 158       |
| 3 C(23) --H(23B) ..O(1) <sup>Inter</sup> | 0.98  | 2.60  | 3.468 | 148       |
| 4 C(15) --H(15A) ..O(2) <sup>Inter</sup> | 0.99  | 2.65  | 3.938 | 145       |
| 5 C(18) --H(18B) ..O(4) <sup>Intra</sup> | 0.99  | 2.41  | 2.818 | 104       |
| 6 C(14) --H(14) ..O(3) <sup>Intra</sup>  | 1.00  | 2.50  | 2.691 | 90        |
| 7 C(17) --H(17A) ..O(5) <sup>Intra</sup> | 0.99  | 2.62  | 3.432 | 139       |
| 8 N(1) --H(1) ..O(2) <sup>Intra</sup>    | 0.88  | 2.02  | 2.711 | 134       |

Analysis of Potential Hydrogen Bonds for Compound **10**

| Donor --- H....Acceptor                  | D - H | H...A | D...A | D - H...A |
|------------------------------------------|-------|-------|-------|-----------|
| 1 C(12) --H(12A) ..O(3) <sup>inter</sup> | 0.97  | 2.67  | 3.634 | 171       |
| 2 C(12) --H(12B) ..O(2) <sup>Inter</sup> | 0.97  | 2.64  | 3.382 | 133       |
| 3 N(1) --H(1) ..O(2) <sup>Intra</sup>    | 0.86  | 2.14  | 2.710 | 123       |

Analysis of Potential Hydrogen Bonds for Compound **11**

| Donor --- H....Acceptor                | D - H | H...A | D...A | D - H...A |
|----------------------------------------|-------|-------|-------|-----------|
| 1C(17) --H(17) ..O(4) <sup>inter</sup> | 0.93  | 2.668 | 3.488 | 148       |
| 2C(16) --H(16) ..O(3) <sup>intra</sup> | 0.93  | 2.589 | 3.486 | 162       |
| 3 N(1) --H(1) ..O(3) <sup>Intra</sup>  | 0.86  | 3.177 | 3.936 | 148       |
| 4 N(1) --H(1) ..O(2) <sup>Intra</sup>  | 0.86  | 2.185 | 2.798 | 128       |
| 5 C(5) --H(5) ..O(1) <sup>inter</sup>  | 0.93  | 2.634 | 3.367 | 136       |

### Single Crystal X-ray Crystallographic Data.

Crystal Data for the compounds **1-11** were collected at  $T = 293$  K, on SMART APEX CCD Single Crystal X-ray diffractometer using Mo KR radiation ( $\lambda$ ) 0.7107 Å). The structures were solved by direct methods using SHELXTL. All the data were corrected for Lorentz polarization and absorption effects. SHELX-97 (ShelxTL) was used for structure solution and full matrix least-squares refinement on  $F^2$ . Hydrogen atoms were included in the refinement in the riding mode. The refinements were carried out using SHELXL-97.<sup>4</sup>

**Crystal Data for 1.** Single crystals of **1** were grown by slow evaporation of the mixture of methanol and dichloromethane. Colorless prism crystals of approximate size 0.31 x 0.21 x 0.12 mm, was used for data collection. Temperature = 297 K, Wave length = 0.71073 Å, Hemisphere acquisition. Total scans = 4,  $F(000) = 440$ ,  $\theta$  range = 1.90 to 25.00, completeness to  $\theta$  of 25.00° is 99.6 %, SADABS correction applied, Goodness-of-fit on  $F^2 = 0.990$ ,  $C_{20}H_{20}BrN_3O_3$ ,  $M = 430.30$ . Crystals belong to Monoclinic, space group P21,  $a = 11.1418(8)$ ,  $b = 7.1748(5)$ ,  $c = 12.9148(10)$  Å,  $V = 994.55(13)$  Å<sup>3</sup>,  $Z = 2$ ,  $D_c = 1.437$  mg m<sup>-3</sup>,  $\mu$  (Mo-K $\alpha$ ) = 2.091 mm<sup>-1</sup>, 5062 reflections measured, 2888 unique [ $I > 2\sigma(I)$ ], R value 0.0297, wR2 = 0.0714.

**Crystal Data for 2.** Single crystals of **2** were grown by slow evaporation of the mixture of ethyl acetate and pet. ether. Colorless needle of approximate size 0.17 x 0.12 x 0.12 mm, was used for data collection. Temperature = 295 K, Wave length = 0.71073 Å, Hemisphere acquisition. Total scans = 3,  $F(000) = 952$ ,  $\theta$  range = 2.11 to 24.99°, completeness to  $\theta$  of 24.99° is 100.0 %. SADABS correction applied, Goodness-of-fit on  $F^2 = 0.999$   $C_{23}H_{32}N_4O_5$ ,  $M = 444.53$ . Crystals belong to Orthorhombic, space group P2<sub>1</sub>2<sub>1</sub>2<sub>1</sub>,  $a = 8.9732(8)$ ,  $b = 10.4292(9)$ ,  $c = 25.653(2)$  Å,  $V = 2400.7(4)$  Å<sup>3</sup>,  $Z = 4$ ,  $D_c = 1.230$  mg m<sup>-3</sup>,  $\mu$  (Mo-K $\alpha$ ) = 0.088 mm<sup>-1</sup>, 12181 reflections measured, 4239 unique [ $I > 2\sigma(I)$ ], R value 0.0467, wR2 = 0.1223.

**Crystal Data for 3.** Single crystals of **3** were grown by slow evaporation of the mixture of methanol and dichloromethane. Colorless plate of approximate size 0.17 x 0.12 x 0.02 mm, was used for data collection. Temperature = 296 K, Wave length = 0.71073 Å, Total scans = 4,  $F(000) = 944$ ,  $\theta$  range = 1.62 to 25.00°, completeness to  $\theta$  of 24.99° is 100.0 %. SADABS correction applied, Goodness-of-fit on  $F^2 = 1.203$ ,  $C_{21}H_{22}BrN_3O_4$ ,  $M = 460.33$ . Crystals belong to Orthorhombic, space group P2<sub>1</sub>2<sub>1</sub>2<sub>1</sub>,  $a = 7.1599(7)$ ,  $b = 11.8460(11)$ ,  $c = 25.160(2)$  Å,  $V = 2134.0(4)$  Å<sup>3</sup>,  $Z = 4$ ,  $D_c = 1.433$  mg m<sup>-3</sup>,  $\mu$  (Mo-K $\alpha$ ) = 1.958 mm<sup>-1</sup>, 17385 reflections measured, 3754 unique [ $I > 2\sigma(I)$ ], R value 0.0749, wR2 = 0.1330.

**Crystal Data for 4.** Single crystals of **4** were grown by slow evaporation of the mixture of methanol. Colorless thin plate of approximate size 0.48 x 0.14 x 0.02 mm, was used for data collection. Temperature = 297 K, Wave length = 0.71073 Å, Total scans = 4,  $F(000) = 488$ ,  $\theta$  range = 1.89 to 25.00°, completeness to  $\theta$  of 25.00° is 99.7 %. SADABS correction applied, Goodness-of-fit on  $F^2 = 0.985$ ,  $C_{20}H_{17}BrF_3N_3O_3$ ,  $M = 484.28$ . Crystals belong to monoclinic, space group P21,  $a = 11.016(5)$ ,  $b = 7.612(3)$ ,  $c = 12.920(5)$  Å,  $V = 1059.2(7)$  Å<sup>3</sup>,  $Z = 2$ ,  $D_c = 1.518$  mg m<sup>-3</sup>,  $\mu$  (Mo-K $\alpha$ ) = 1.992 mm<sup>-1</sup>, 5304 reflections measured, 3754 unique [ $I > 2\sigma(I)$ ], R value 0.0469, wR2 = 0.0954.

**Crystal Data for 5.** Single crystals of **5** were grown by slow evaporation of the mixture of methanol. Colorless needle of approximate size 0.62 x 0.15 x 0.11 mm, was used for data collection. Temperature = 297 K, Wave length = 0.71073 Å, Total scans = 4, F(000) = 504,  $\theta$  range = 2.19 to 25.00°, completeness to  $\theta$  of 25.00° is 98.7 %. SADABS correction applied, Goodness-of-fit on F2 = 1.203, C<sub>23</sub>H<sub>26</sub>BrN<sub>3</sub>O<sub>4</sub>, *M* = 488.38. Crystals belong to monoclinic, space group P21, *a* = 12.8420(19), *b* = 7.0231(10), *c* = 13.3863(19) Å, *V* = 1207.3(3) Å<sup>3</sup>, *Z* = 2, *D*<sub>c</sub> = 1.343 mg m<sup>-3</sup>,  $\mu$  (Mo-K $\alpha$ ) = 1.734 mm<sup>-1</sup>, 9259 reflections measured, 4152 unique [*I*>2 $\sigma$ (*I*)], *R* value 0.1045, wR2 = 0.1533.

**Crystal Data for 6.** Single crystals of **6** were grown by slow evaporation of the mixture of methanol and dichloromethane. Colorless needle of approximate size 1.37 x 0.54 x 0.47 mm, was used for data collection. Temperature = 297 K, Wave length = 0.71073 Å, Total scans = 4, F(000) = 744,  $\theta$  range = 2.28 to 25.00°, completeness to  $\theta$  of 25.00° is 99.8 %. SADABS correction applied, Goodness-of-fit on F2 = 1.042, C<sub>18</sub>H<sub>24</sub>N<sub>2</sub>O<sub>5</sub>, *M* = 348.39. Crystals belong to orthorhombic, space group P2(1)2(1)2(1), *a* = 8.547(5), *b* = 9.694(5), *c* = 22.943(12) Å, *V* = 1900.9(18) Å<sup>3</sup>, *Z* = 4, *D*<sub>c</sub> = 1.217 mg m<sup>-3</sup>,  $\mu$  (Mo-K $\alpha$ ) = 0.089 mm<sup>-1</sup>, 18354 reflections measured, 3348 unique [*I*>2 $\sigma$ (*I*)], *R* value 0.0479, wR2 = 0.1257.

**Crystal Data for 7.** Single crystals of **7** were grown by slow evaporation of the mixture of ethylacetate and pet. ether. Colorless rectangular crystals of approximate size 0.43 x 0.31 x 0.14 mm, was used for data collection. Temperature = 296 K, Wave length = 0.71073 Å, Total scans = 4, F(000) = 904,  $\theta$  range = 2.09 to 25.00°, completeness to  $\theta$  of 25.00° is 100 %. SADABS correction applied, Goodness-of-fit on F2 = 1.066, C<sub>24</sub>H<sub>28</sub>N<sub>2</sub>O<sub>5</sub>, *M* = 424.48. Crystals belong to orthorhombic, space group P2(1)2(1)2(1), *a* = 10.6231(7), *b* = 10.9569(7), *c* = 19.5280(12) Å, *V* = 2273.0(3) Å<sup>3</sup>, *Z* = 4, *D*<sub>c</sub> = 1.240 mg m<sup>-3</sup>,  $\mu$  (Mo-K $\alpha$ ) = 0.087 mm<sup>-1</sup>, 11578 reflections measured, 4004 unique [*I*>2 $\sigma$ (*I*)], *R* value 0.0402, wR2 = 0.0946.

**Crystal Data for 8.** Single crystals of **8** were grown by slow evaporation of the mixture of ethylacetate and pet. ether. Colorless thick plate crystals of approximate size 0.50 x 0.27 x 0.22 mm, was used for data collection. Temperature = 173 K, Wave length = 0.71073 Å, Total scans = 4, F(000) = 680,  $\theta$  range = 2.318 to 28.349°, completeness to  $\theta$  of 28.41° is 99.1 %. SADABS correction applied, Goodness-of-fit on F2 = 1.031, C<sub>16</sub>H<sub>20</sub>N<sub>2</sub>O<sub>5</sub>, *M* = 320.34. Crystals belong to orthorhombic, space group P2(1)2(1)2(1), *a* = 8.111(2), *b* = 9.756(2), *c* = 20.126(6) Å, *V* = 1592.6(7) Å<sup>3</sup>, *Z* = 4, *D*<sub>c</sub> = 1.336 mg m<sup>-3</sup>,  $\mu$  (Mo-K $\alpha$ ) = 0.100 mm<sup>-1</sup>, 8457 reflections measured, 3901 unique [*I*>2 $\sigma$ (*I*)], *R* value 0.0353, wR2 = 0.0823.

**Crystal Data for 9.** Single crystals of **9** were grown by slow evaporation of the mixture of ethylacetate and pet. ether. Colorless block crystals of approximate size 0.62 x 0.59 x 0.27 mm, was used for data collection. Temperature = 100 K, Wave length = 0.71073 Å, Total scans = 4, F(000) = 952,  $\theta$  range = 2.10 to 25.00°, completeness to  $\theta$  of 25.00° is 99.8 %. SADABS correction applied, Goodness-of-fit on F2 = 1.090, C<sub>25</sub>H<sub>34</sub>N<sub>2</sub>O<sub>5</sub>, *M* = 442.54. Crystals belong to orthorhombic, space group P2(1)2(1)2(1), *a* = 7.4115(4), *b* = 16.5480(9), *c* = 19.3577(11) Å, *V* = 2374.1(2) Å<sup>3</sup>, *Z* = 4, *D*<sub>c</sub> = 1.238 mg m<sup>-3</sup>,  $\mu$  (Mo-K $\alpha$ ) = 0.086 mm<sup>-1</sup>, 17494 reflections measured, 4176 unique [*I*>2 $\sigma$ (*I*)], *R* value 0.0442, wR2 = 0.1054.

**Crystal Data for 10.** Single crystals of **10** were grown by slow evaporation of the mixture of ethylacetate and pet. ether. Colorless plate crystals of approximate size 0.44 x 0.34 x 0.14 mm, was used for data collection. Temperature = 297 K, Wave length = 0.71073 Å, Total scans = 4, F(000) = 744,  $\theta$  range = 1.77 to 25.00°, completeness to  $\theta$  of 25.00° is 100 %. SADABS correction applied, Goodness-of-fit on F2 = 1.062, C<sub>18</sub>H<sub>24</sub>N<sub>2</sub>O<sub>5</sub>,  $M = 348.39$ . Crystals belong to orthorhombic, space group P2(1)2(1)2(1),  $a = 8.3515(8)$ ,  $b = 9.6398(9)$ ,  $c = 22.979(2)$  Å,  $V = 1850.0(3)$  Å<sup>3</sup>,  $Z = 4$ ,  $D_c = 1.251$  mg m<sup>-3</sup>,  $\mu$  (Mo-K $\alpha$ ) = 0.092 mm<sup>-1</sup>, 9400 reflections measured, 3251 unique [ $I > 2\sigma(I)$ ], R value 0.0430, wR2 = 0.1150.

**Crystal Data for 11.** Single crystals of **11** were grown by slow evaporation of the mixture of diethylether and pet. ether. Colorless plate crystals of approximate size 0.24 x 0.12 x 0.03 mm, was used for data collection. Temperature = 297 K, Wave length = 0.71073 Å, Total scans = 4, F(000) = 744,  $\theta$  range = 1.96 to 25.99°, completeness to  $\theta$  of 25.99° is 99.9 %. SADABS correction applied, Goodness-of-fit on F2 = 1.117, C<sub>40</sub>H<sub>40</sub>N<sub>4</sub>O<sub>8</sub>,  $M = 704.76$ . Crystals belong to orthorhombic, space group P2(1)2(1)2(1),  $a = 8.173(5)$ ,  $b = 13.001(8)$ ,  $c = 17.350(11)$  Å,  $V = 1843.5(19)$  Å<sup>3</sup>,  $Z = 2$ ,  $D_c = 1.270$  mg m<sup>-3</sup>,  $\mu$  (Mo-K $\alpha$ ) = 0.089 mm<sup>-1</sup>, 10075 reflections measured, 3616 unique [ $I > 2\sigma(I)$ ], R value 0.0488, wR2 = 0.1084.

## References

- (1) P. Prabhakaran, S. S. Kale, V. G. Puranik, P. R. Rajamohanan, O. Chetina, J. A. K. Howard, H. –J. Hofmann and G. J. Sanjayan, *J. Am. Chem. Soc.* 2008, **130**, 17743.
- (2) B. Blank, R. S. Cohen and W. D. Spiggle, *J. Chem. Eng. Data*, 1968, **13**, 577.
- (3) L. Xinyun, H. Xing, L. Junpeng, S. Xuegong and P. Xinfu, *Chin. J. Chem.* 2009, **27**, 1379.
- (4) Sheldrick, G. M.; SHELX-97 program for crystal structure solution and refinement, University of Gottingen, Germany, 1997.
